# Supplementary material for: The German National Registry of Primary Immunodeficiencies (2012–2017)
Source: PubMed Central journal article supplement (PMC6659583; doi:10.3389/fimmu.2019.01272), 2019-07-19
Supplement: Presentation_1.pdf [file Presentation_1.pdf]

# Supplements

## Table of Content

|                                                                                                                                                                                                  |    |
|--------------------------------------------------------------------------------------------------------------------------------------------------------------------------------------------------|----|
| S1: Documenting centres .....                                                                                                                                                                    | 4  |
| S2: ESID Online Registry: List of diseases and genes with registered patients. ....                                                                                                              | 16 |
| S3: Genetic delay in 24 SCID patients .....                                                                                                                                                      | 17 |
| S4: Genetic delay in 37 HIES patients .....                                                                                                                                                      | 17 |
| S5: Registered PID-distribution in Germany, March 2012.....                                                                                                                                      | 18 |
| S6: The 12 foremost PID and genes within their main category.....                                                                                                                                | 20 |
| S7: Main categories of PID: Differences in grouping main categories (2012 and 2017).....                                                                                                         | 21 |
| S8: Age and gender distribution of 1,437 living patients of the 12 PIDs patients groups,<br>XLP, WAS, and FHLH patients (no HSCT or gene therapy) .....                                          | 22 |
| S9: Age and gender distribution of 208 living patients of the 12 PIDs patients groups,<br>XLP, WAS, and FHLH patients (with HSCT, and 3 patients also with gene therapy).....                    | 22 |
| S10: Age range and median age at last news from patient in years of the 12 most prevalent PID diagnoses<br>and WAS, XLP and FHLH (patients with HSCT but no gene therapy), living patients ..... | 23 |
| S11: Age at gene therapy.....                                                                                                                                                                    | 23 |
| S12: Age and gender distribution of 665 living CVID patients.<br>No patients received an HSCT or gene therapy.....                                                                               | 24 |
| S13: Age and gender distribution of 221 living unclassified antibody deficiency patients.<br>No patients received an HSCT or gene therapy.....                                                   | 24 |
| S14: Age and gender distribution of 8 living SCID patients.<br>No patients received an HSCT or gene therapy.....                                                                                 | 25 |
| S15: Age and gender distribution of 64 living SCID patients (with HSCT, no gene therapy).....                                                                                                    | 25 |
| S16: Age and gender distribution of 52 living DGS patients (with HSCT, no gene therapy).....                                                                                                     | 26 |
| S17: Age and gender distribution of 82 living isolated IgG subclass deficiency patients.<br>No patients received an HSCT or gene therapy.....                                                    | 26 |
| S18: Age and gender distribution of 42 living unclassified IDs.<br>No patients received an HSCT or gene therapy.....                                                                             | 27 |
| S19: Age and gender distribution of 47 living selective IgA deficiency patients.<br>No patients received an HSCT or gene therapy.....                                                            | 27 |
| S20: Age and gender distribution of 58 living CGD patients.<br>No patients received an HSCT or gene therapy.....                                                                                 | 28 |
| S21: Age and gender distribution of 51 living CGD patients (HSCT but no gene therapy).....                                                                                                       | 28 |
| S22: Age and gender distribution of 97 living agammaglobulinemia.<br>No patients received an HSCT or gene therapy.....                                                                           | 29 |
| S23: Age and gender distribution of 38 living combined ID.<br>No patients received an HSCT or gene therapy.....                                                                                  | 29 |
| S24: Age and gender distribution of 25 living combined ID patients (HSCT but no gene therapy).....                                                                                               | 30 |
| S25: Age and gender distribution of 47 living HIES patients.<br>No patients received an HSCT or gene therapy.....                                                                                | 30 |
| S26: Age and gender distribution of 8 living HIES patients (HSCT but no gene therapy) .....                                                                                                      | 31 |
| S27: Age and gender distribution of 55 living A-T patients.<br>No patients received an HSCT or gene therapy.....                                                                                 | 31 |
| S28: Age-and gender distribution of 21 male patients receiving HSCT and/or gene therapy .....                                                                                                    | 32 |
| S29: Age-and gender distribution of 18 living WAS patients (HSCT but no gene therapy) .....                                                                                                      | 32 |
| S30: Age-and gender distribution of 15 living XLP patients. No patients received an HSCT or gene therapy. ....                                                                                   | 33 |

|                                                                                                                     |    |
|---------------------------------------------------------------------------------------------------------------------|----|
| S31: Age-and gender distribution of 7 living XLP patients (HSCT but no gene therapy).....                           | 33 |
| S32: Age-and gender distribution of 3 living FHLH patients. No patients received an HSCT or gene therapy.....       | 34 |
| S33: Age-and gender distribution of 15 living FHLH patients (HSCT but no gene therapy) .....                        | 34 |
| S34: PIDs with nearly no genetic information.....                                                                   | 35 |
| S35: 12 PIDs: genetic information.....                                                                              | 36 |
| S36: Mainly male and female patients in PID with non-X-linked gene defect, with a diagnosed gene defect .....       | 37 |
| S37: Consanguinity and family case in main categories .....                                                         | 37 |
| S38: Gender, deceased, lost, gene identified, consanguinity, and family case by PIDs.....                           | 45 |
| S39: Presenting symptoms.....                                                                                       | 49 |
| S40: Onset of the 12 most common PIDs .....                                                                         | 50 |
| S41: Onset of symptoms mainly in the first year of life.....                                                        | 51 |
| S42: Onset of symptoms mainly between the ages of 1 to 5.....                                                       | 51 |
| S43: Onset of symptoms with main onset age of 1 to 5 years and late onset .....                                     | 51 |
| S44: Genetic diagnosis before onset of symptoms .....                                                               | 52 |
| S45: Age at diagnosis in 2,314 patients .....                                                                       | 53 |
| S46: Average and median of genetic diagnostic delay.....                                                            | 54 |
| S47: Cause of death for 51 patients.....                                                                            | 58 |
| S48: PID with no IgG substitution (PIDs with minimum 10 patients of 270 patients).....                              | 58 |
| S49: IgG substitution delay.....                                                                                    | 63 |
| S50: Relative IgG-dose [mg per kg body weight per month] and side effects (1,061 patients) .....                    | 65 |
| S51: Patients with HSCT .....                                                                                       | 67 |
| S52: Patients with HSCT and Ig treatment after HSCT .....                                                           | 68 |
| Age distribution by year of birth.....                                                                              | 69 |
| S53: Age distribution by year of birth of 2,453 patients.....                                                       | 69 |
| S54: Age distribution by year of birth of 12 PIDs (1,825 patients).....                                             | 69 |
| S55: Age distribution by year of birth of 728 CVID patients .....                                                   | 70 |
| S56: Age distribution by year of birth of the 5 PIDs with the most patients (all registered patients).....          | 70 |
| S57: Age distribution by year of birth of the first 7-12 PIDs with the most patients (all registered patients)..... | 71 |

| State of Germany       | Centre                                                 | Number of patients 2012 | Number of patients 2017 |
|------------------------|--------------------------------------------------------|-------------------------|-------------------------|
| Baden-Württemberg      |                                                        | 512                     | 526                     |
|                        | Freiburg, CCI (c.d. / a.d.*)                           | 508                     | 488                     |
|                        | Ulm, University Children's Hospital                    | 3                       | 79                      |
|                        | Tübingen, University Hospital (c.d. / a.d.)            | 0                       | 22                      |
|                        | Heidelberg, Children's Hospital (Immunology)           | 0                       | 9                       |
|                        | Stuttgart, Klinikum Stuttgart – Olgahospital (c.d.)    | 4                       | 7                       |
| Bavaria                |                                                        | 221                     | 485                     |
|                        | Munich, LMU: Children's Hospital Dr. von Hauner        | 191                     | 309                     |
|                        | Würzburg, University Hospital (c.d. / a.d.)            | 27                      | 59                      |
|                        | Munich, TUM, Children Hospital Schwabing               | 0                       | 30                      |
|                        | Erlangen, University Children's Hospital               | 0                       | 8                       |
| Berlin                 |                                                        | 33                      | 326                     |
|                        | Berlin, Charité (c.d. / a.d.)                          | 33                      | 322                     |
|                        | Berlin, Vivantes Klinikum im Friedrichshain (c.d.)     | 0                       | 3                       |
|                        | Berlin-Buch, Helios Hospital (c.d.)                    | 0                       | 1                       |
| Bremen                 |                                                        | 5                       | 11                      |
|                        | Bremen, Prof.-Hess-Kinderklinik                        | 5                       | 11                      |
| Hamburg                |                                                        | 0                       | 7                       |
|                        | Hamburg-Eppendorf, Paediatric SCT and Immunology       | 0                       | 7                       |
| Hessen                 |                                                        | 59                      | 103                     |
|                        | Frankfurt, University Hospital                         | 59                      | 103                     |
| Lower Saxony           |                                                        | 270                     | 388                     |
|                        | Hannover, MHH (c.d. / a.d.)                            | 270                     | 384                     |
|                        | Göttingen, UMG: Centre for Child and Adolescent Health | 0                       | 4                       |
| Mecklenburg-Vorpommern |                                                        | 4                       | 5                       |
|                        | Rostock, University Children's Hospital                | 4                       | 5                       |
| North Rhine-Westphalia |                                                        | 177                     | 282                     |
|                        | Düsseldorf, University Children's Hospital             | 57                      | 86                      |
|                        | Krefeld ID Centre                                      | 47                      | 77                      |
|                        | Münster, University Hospital                           | 21                      | 44                      |
|                        | Bochum, University Children's Hospital                 | 37                      | 30                      |
|                        | Bonn, University Hospital (c.d. / a.d.)                | 14                      | 22                      |
|                        | Sankt Augustin, Asklepios Klinik                       | 1                       | 7                       |
|                        | Aachen, Children's University Hospital                 | 0                       | 5                       |
|                        | Dortmund, KlinikumDo, Childrens Hospital               | 0                       | 5                       |
|                        | Cologne, Kinderkrankenhaus Amsterdamer Strasse         | 0                       | 4                       |
|                        | Essen, St. Josef Krankenhaus Essen-Werden GmbH (a.d.)  | 0                       | 2                       |
| Saarland               |                                                        | 0                       | 8                       |
|                        | Homburg, University Children's Hospital                | 0                       | 8                       |

| State of Germany   | Centre                                                | Number of patients 2012 | Number of patients 2017 |
|--------------------|-------------------------------------------------------|-------------------------|-------------------------|
| Saxony             |                                                       | 43                      | 225                     |
|                    | Leipzig, Children's hospital St. Georg                | 0                       | 184                     |
|                    | Leipzig, MVZ Dr. Reising-Ackermann u. Kollegen (a.d.) | 62                      | 67                      |
|                    | Dresden, University Children's Hospital               | 43                      | 41                      |
|                    | Leipzig, University Children's Hospital               | 0                       | 0                       |
| Saxony-Anhalt      |                                                       | 62                      | 68                      |
|                    | Halle, University Children's Hospital                 | 0                       | 1                       |
|                    | Magdeburg, University Children's Hospital             | 0                       | 0                       |
| Schleswig-Holstein |                                                       | 0                       | 19                      |
|                    | Kiel, UKSH (c.d. / a.d.)                              | 0                       | 19                      |
| <b>Total:</b>      |                                                       | <b>1,386</b>            | <b>2,453</b>            |

### S1: Documenting centres

\*c.d.: children department; a.d.: adult department

German centres which entered data into PID-NET registry. We grouped the centres by federal states (alphabetically) and cities (according to the amount of registered patients). Magdeburg and university hospital of Leipzig did not enter any data yet

| Main category                                                          | Sub category                                                                    | PID diagnosis                                                        | Mutated gene*                                             | Number of patients |    |
|------------------------------------------------------------------------|---------------------------------------------------------------------------------|----------------------------------------------------------------------|-----------------------------------------------------------|--------------------|----|
| Autoinflammatory disorders (84 patients)                               | Blau syndrome                                                                   | Caspase recruitment domain-containing protein 15 deficiency (CARD15) | CARD15                                                    | 0                  |    |
|                                                                        | CINCA syndrome                                                                  | CINCA syndrome                                                       | CIAS1 (NLRP3)                                             | 6                  |    |
|                                                                        | Familial cold autoinflammatory syndrome                                         | Familial cold autoinflammatory syndrome                              | CIAS1 (NLRP3)                                             | 2                  |    |
|                                                                        | Familial Mediterranean fever                                                    | Familial Mediterranean fever defect                                  | MEFV                                                      | 24                 |    |
|                                                                        | Familial periodic fever                                                         | Hyper IgD syndrome (MVK)                                             | TNF-receptor associated periodic fever syndrome (TRAPS)   | MVK                | 5  |
|                                                                        |                                                                                 |                                                                      |                                                           | TNFRSF1A           | 18 |
|                                                                        | Muckle-Wells syndrome                                                           | Muckle-Wells syndrome                                                | CIAS1 (NLRP3)                                             | 7                  |    |
|                                                                        | Other autoinflammatory diseases with known genetic defect                       | Other autoinflammatory diseases with known genetic defect            | Other autoinflammatory diseases with known genetic defect | CAD14              | 0  |
|                                                                        |                                                                                 |                                                                      |                                                           | HOIL1              | 0  |
|                                                                        |                                                                                 |                                                                      |                                                           | IL1RN              | 0  |
|                                                                        |                                                                                 |                                                                      |                                                           | IL36RN             | 0  |
|                                                                        |                                                                                 |                                                                      |                                                           | LPIN2              | 0  |
|                                                                        |                                                                                 |                                                                      |                                                           | PLCG2              | 0  |
|                                                                        |                                                                                 |                                                                      |                                                           | PSMB8              | 0  |
|                                                                        |                                                                                 |                                                                      |                                                           | SH3BP2             | 0  |
|                                                                        |                                                                                 | SLC29A3                                                              | 0                                                         |                    |    |
| Periodic fever, unclassified                                           | Periodic fever, unclassified                                                    | none                                                                 | 0                                                         |                    |    |
| Periodic fever aphthous stomatitis, pharyngitis and adenopathy (PFAPA) | PFAPA                                                                           | none                                                                 | 0                                                         |                    |    |
| Pyogenic sterile arthritis pyoderma gangrenosum and acne               | Proline/serine/threonine phosphatase-interacting protein 1 deficiency (PSTPIP1) | PSTPIP1                                                              | 0                                                         |                    |    |
| Unclassified autoinflammatory diseases                                 | Unclassified autoinflammatory diseases                                          | none                                                                 | 22                                                        |                    |    |
| Combined immunodeficiencies (177 patients)                             | Atypical Severe Combined Immunodeficiency (Atypical SCID)                       | Atypical Severe Combined Immunodeficiency (Atypical SCID)            | ADA                                                       | 1                  |    |
|                                                                        |                                                                                 |                                                                      | Artemis                                                   | 1                  |    |
|                                                                        |                                                                                 |                                                                      | CARD11                                                    | 0                  |    |
|                                                                        |                                                                                 |                                                                      | CD3d                                                      | 0                  |    |
|                                                                        |                                                                                 |                                                                      | CD3e                                                      | 0                  |    |
|                                                                        |                                                                                 |                                                                      | CD3z                                                      | 0                  |    |
|                                                                        |                                                                                 |                                                                      | Coronin-1A                                                | 1                  |    |
|                                                                        |                                                                                 |                                                                      | IL2RG (X-linked)                                          | 0                  |    |
|                                                                        |                                                                                 |                                                                      | IL21R                                                     | 0                  |    |
|                                                                        |                                                                                 |                                                                      | IL7Ralpha                                                 | 0                  |    |
|                                                                        |                                                                                 |                                                                      | JAK3                                                      | 0                  |    |
|                                                                        |                                                                                 |                                                                      | PNP                                                       | 2                  |    |
|                                                                        |                                                                                 |                                                                      | RAG1                                                      | 1                  |    |
| RAG2                                                                   | 1                                                                               |                                                                      |                                                           |                    |    |

| Main category                          | Sub category                    | PID diagnosis                   | Mutated gene* | Number of patients         |   |
|----------------------------------------|---------------------------------|---------------------------------|---------------|----------------------------|---|
|                                        | CD4-deficiency                  | Selective CD4 cell deficiency   | <i>CD4</i>    | 1                          |   |
|                                        |                                 |                                 | none          | 1                          |   |
|                                        | CD8-deficiency                  | CD8 deficiency                  | <i>CD8A</i>   | 0                          |   |
|                                        | Combined immunodeficiency (CID) | Combined immunodeficiency (CID) |               | <i>Artemis</i>             | 2 |
|                                        |                                 |                                 |               | <i>CARD11</i>              | 0 |
|                                        |                                 |                                 |               | <i>Caspase 8</i>           | 0 |
|                                        |                                 |                                 |               | <i>CD3G</i>                | 0 |
|                                        |                                 |                                 |               | <i>CD27</i>                | 0 |
|                                        |                                 |                                 |               | <i>CD70</i>                | 0 |
|                                        |                                 |                                 |               | <i>Cernunnos</i>           | 3 |
|                                        |                                 |                                 |               | <i>CTLA-4</i>              | 4 |
|                                        |                                 |                                 |               | <i>DNA-PKcs</i>            | 0 |
|                                        |                                 |                                 |               | <i>DOCK8</i>               | 5 |
|                                        |                                 |                                 |               | <i>IKBKB</i>               | 0 |
|                                        |                                 |                                 |               | <i>IL21R</i>               | 0 |
|                                        |                                 |                                 |               | <i>IL2Ralpha</i>           | 0 |
|                                        |                                 |                                 |               | <i>ITK</i>                 | 1 |
|                                        |                                 |                                 |               | <i>LCK</i>                 | 0 |
|                                        |                                 |                                 |               | <i>LIG4</i>                | 2 |
|                                        |                                 |                                 |               | <i>LRBA</i>                | 1 |
|                                        |                                 |                                 |               | <i>MAGT1</i>               | 0 |
|                                        |                                 |                                 |               | <i>MALT1</i>               | 0 |
|                                        |                                 |                                 |               | <i>MSN (moesin)</i>        | 0 |
|                                        |                                 |                                 |               | <i>MST1 (STK4)</i>         | 0 |
|                                        |                                 |                                 |               | <i>Orai1 (TMEM142A)</i>    | 2 |
|                                        |                                 |                                 |               | <i>OX40</i>                | 0 |
|                                        |                                 |                                 |               | <i>PGM3</i>                | 0 |
|                                        |                                 |                                 |               | <i>PIK3CD (PI3K-delta)</i> | 4 |
|                                        |                                 |                                 |               | <i>PIK3R1</i>              | 0 |
|                                        |                                 |                                 |               | <i>PNP</i>                 | 6 |
| <i>PRKDC</i>                           |                                 |                                 |               | 2                          |   |
| <i>RECQL4 (Poikiloderma congenita)</i> | 0                               |                                 |               |                            |   |
| <i>RhoH</i>                            | 0                               |                                 |               |                            |   |
| <i>RLTPR</i>                           | 0                               |                                 |               |                            |   |
| <i>STAT1</i>                           | 0                               |                                 |               |                            |   |
| <i>STAT5</i>                           | 0                               |                                 |               |                            |   |
| <i>STAT5a</i>                          | 0                               |                                 |               |                            |   |

| Main category                           | Sub category                            | PID diagnosis                        | Mutated gene*                        | Number of patients         |             |
|-----------------------------------------|-----------------------------------------|--------------------------------------|--------------------------------------|----------------------------|-------------|
|                                         |                                         |                                      | <i>STAT5b</i>                        | 0                          |             |
|                                         |                                         |                                      | <i>STIM1</i>                         | 1                          |             |
|                                         |                                         |                                      | <i>TRAC</i>                          | 0                          |             |
|                                         |                                         |                                      | <i>TTC7A</i>                         | 0                          |             |
|                                         |                                         |                                      | <i>UNC119D</i>                       | 0                          |             |
|                                         |                                         |                                      | <i>ZAP70</i>                         | 0                          |             |
|                                         |                                         |                                      | none                                 | 41                         |             |
|                                         |                                         |                                      | Activated PI3K-delta syndrome (APDS) | <i>PIK3R1 (PI3K-delta)</i> | 0           |
|                                         |                                         |                                      |                                      | <i>PIK3R1</i>              | 0           |
|                                         |                                         |                                      | HLA class I deficiency               | HLA class I deficiency     | <i>TAP1</i> |
|                                         |                                         |                                      | <i>TAP2</i>                          | 0                          |             |
|                                         |                                         |                                      | <i>TAPBP</i>                         | 0                          |             |
|                                         | HLA class II deficiency                 | HLA class II deficiency              | <i>MHC2TA</i>                        | 1                          |             |
|                                         |                                         |                                      | <i>RFX5</i>                          | 0                          |             |
|                                         |                                         |                                      | <i>RFXANK</i>                        | 1                          |             |
|                                         |                                         |                                      | <i>RFXAP</i>                         | 2                          |             |
|                                         |                                         |                                      | none                                 | 1                          |             |
|                                         | NUDE/SCID                               | Winged-helix nude deficiency (FOXN1) | <i>FOXN1</i>                         | 0                          |             |
|                                         | Omenn syndrome                          | Omenn syndrome                       | <i>ADA</i>                           | 0                          |             |
|                                         |                                         |                                      | <i>Artemis</i>                       | 0                          |             |
|                                         |                                         |                                      | <i>CD45</i>                          | 0                          |             |
|                                         |                                         |                                      | <i>Coronin-1A</i>                    | 0                          |             |
|                                         |                                         |                                      | <i>Del 22q11.2</i>                   | 0                          |             |
|                                         |                                         |                                      | <i>IL2RG (X-linked)</i>              | 0                          |             |
|                                         |                                         |                                      | <i>IL21R</i>                         | 0                          |             |
|                                         |                                         |                                      | <i>IL2Ralpha</i>                     | 0                          |             |
|                                         |                                         |                                      | <i>IL7Ralpha</i>                     | 0                          |             |
|                                         |                                         |                                      | <i>JAK3</i>                          | 0                          |             |
|                                         |                                         |                                      | <i>RAG1</i>                          | 1                          |             |
|                                         |                                         |                                      | <i>RAG2</i>                          | 1                          |             |
|                                         |                                         | <i>RMRP</i>                          | 0                                    |                            |             |
|                                         |                                         | none                                 | 3                                    |                            |             |
| Severe combined immunodeficiency (SCID) | Reticular Dysgenesis - AK2 (SCID)       | <i>AK2</i>                           | 1                                    |                            |             |
|                                         | Reticular Dysgenesis - UNK (SCID)       | none                                 | 0                                    |                            |             |
|                                         | Severe combined immunodeficiency (SCID) | <i>ADA</i>                           | 10                                   |                            |             |
|                                         |                                         | <i>Artemis</i>                       | 11                                   |                            |             |
|                                         |                                         | <i>CD3d</i>                          | 0                                    |                            |             |
|                                         |                                         | <i>CD3e</i>                          | 0                                    |                            |             |
|                                         |                                         | <i>CD3z</i>                          | 0                                    |                            |             |

| Main category                         | Sub category          | PID diagnosis                                                  | Mutated gene*             | Number of patients |
|---------------------------------------|-----------------------|----------------------------------------------------------------|---------------------------|--------------------|
|                                       |                       |                                                                | <i>CD45</i>               | 0                  |
|                                       |                       |                                                                | <i>Coronin-1A</i>         | 0                  |
|                                       |                       |                                                                | <i>Del 22q11.2</i>        | 0                  |
|                                       |                       |                                                                | <i>DNA-PKcs</i>           | 0                  |
|                                       |                       |                                                                | <i>IL2RG (X-linked)</i>   | 18                 |
|                                       |                       |                                                                | <i>IL21R</i>              | 0                  |
|                                       |                       |                                                                | <i>IL7Ralpha</i>          | 3                  |
|                                       |                       |                                                                | <i>JAK3</i>               | 2                  |
|                                       |                       |                                                                | <i>LIG4</i>               | 0                  |
|                                       |                       |                                                                | <i>RAG1</i>               | 14                 |
|                                       |                       |                                                                | <i>RAG2</i>               | 6                  |
|                                       |                       |                                                                | none                      | 19                 |
| Complement deficiencies (44 patients) | Complement deficiency | Acquired angioedema                                            | none                      | 1                  |
|                                       |                       | C3b inactivator deficiency                                     | <i>C3b inactivator</i>    | 0                  |
|                                       |                       | CD59 antigen P18-20 deficiency (CD59)                          | <i>CD59</i>               | 0                  |
|                                       |                       | Complement component 1 deficiency                              | <i>C1Q-alpha</i>          | 0                  |
|                                       |                       |                                                                | <i>C1Q-beta</i>           | 1                  |
|                                       |                       |                                                                | <i>C1Q-gamma</i>          | 0                  |
|                                       |                       |                                                                | <i>C1r</i>                | 0                  |
|                                       |                       |                                                                | <i>C1s</i>                | 0                  |
|                                       |                       |                                                                | <i>Q, subunit unknown</i> | 0                  |
|                                       |                       | Complement component 2 deficiency                              | <i>C2</i>                 | 6                  |
|                                       |                       | Complement component 3 deficiency                              | <i>C3</i>                 | 0                  |
|                                       |                       | Complement component 4 deficiency                              | <i>C4</i>                 | 0                  |
|                                       |                       | Complement component 5 deficiency                              | <i>C5</i>                 | 0                  |
|                                       |                       | Complement component 6 deficiency                              | <i>C6</i>                 | 0                  |
|                                       |                       | Complement component 7 deficiency                              | <i>C7</i>                 | 1                  |
|                                       |                       | Complement component 8 deficiency                              | <i>C8</i>                 | 3                  |
|                                       |                       | Complement component 9 deficiency                              | <i>C9</i>                 | 0                  |
|                                       |                       | Complement factor B deficiency                                 | <i>Factor B</i>           | 0                  |
|                                       |                       | Complement factor H deficiency                                 | <i>Factor H</i>           | 0                  |
|                                       |                       | Decay-accelerating factor for complement deficiency (DAF CD55) | <i>CD55</i>               | 0                  |
| Factor D deficiency                   | <i>Factor D</i>       | 0                                                              |                           |                    |
| Factor I deficiency                   | <i>Factor I</i>       | 1                                                              |                           |                    |
| Ficolin3 deficiency                   | <i>FCN3</i>           | 0                                                              |                           |                    |
| Hereditary Angioedema (C1inh)         | <i>C1 Inhibitor</i>   | 20                                                             |                           |                    |
|                                       | none                  | 3                                                              |                           |                    |



| Main category                                                   | Sub category                                                    | PID diagnosis                                           | Mutated gene*                               | Number of patients |   |
|-----------------------------------------------------------------|-----------------------------------------------------------------|---------------------------------------------------------|---------------------------------------------|--------------------|---|
|                                                                 |                                                                 | Mannan-binding lectin serine protease (MASP) deficiency | <i>COLEC11</i>                              | 0                  |   |
|                                                                 |                                                                 |                                                         | <i>MASP1</i>                                | 0                  |   |
|                                                                 |                                                                 |                                                         | <i>MASP2</i>                                | 0                  |   |
|                                                                 |                                                                 | Membrane Attack Complex Inhibitor (CD59) deficiency     | <i>CD59</i>                                 | 0                  |   |
|                                                                 |                                                                 |                                                         | Membrane Cofactor Protein (CD46) deficiency | <i>CD46</i>        | 0 |
|                                                                 |                                                                 | Properdin P factor complement deficiency (PFC)          | <i>Properdin</i>                            | 1                  |   |
|                                                                 |                                                                 |                                                         | none                                        | 1                  |   |
|                                                                 |                                                                 | Thrombomodulin deficiency                               | <i>THBD</i>                                 | 0                  |   |
|                                                                 |                                                                 | Mannose-binding lectin (MBL)                            | Mannose-binding lectin deficiency (MBL)     | <i>MBL</i>         | 1 |
|                                                                 |                                                                 | Unclassified complement deficiencies                    | Unclassified complement deficiencies        | none               | 5 |
| Defects in innate immunity (45 patients)                        | CARD 9 deficiency                                               | CARD9 deficiency                                        | <i>CARD9</i>                                | 0                  |   |
|                                                                 | Chronic mucocutaneous candidiasis (CMC)                         | Chronic mucocutaneous candidiasis (CMC)                 | <i>ACT1</i>                                 | 0                  |   |
|                                                                 |                                                                 |                                                         | <i>AIRE</i>                                 | 0                  |   |
|                                                                 |                                                                 |                                                         | <i>IL-17 F</i>                              | 1                  |   |
|                                                                 |                                                                 |                                                         | <i>IL-17 receptor alpha</i>                 | 1                  |   |
|                                                                 |                                                                 |                                                         | <i>STAT1</i>                                | 13                 |   |
|                                                                 |                                                                 |                                                         | none                                        | 4                  |   |
|                                                                 | Defects of TLR/NFkappa-B signalling                             | Defects of TLR/NFkappa-B signalling                     | <i>IKK-gamma (NEMO, IKBKG)</i>              | 3                  |   |
|                                                                 |                                                                 |                                                         | <i>IRAK4</i>                                | 3                  |   |
|                                                                 |                                                                 |                                                         | <i>MyD88</i>                                | 3                  |   |
|                                                                 |                                                                 |                                                         | <i>NFKBIA</i>                               | 0                  |   |
|                                                                 |                                                                 |                                                         | <i>TIRAP</i>                                | 0                  |   |
|                                                                 | Epidermodysplasia verruciformis                                 | Epidermodysplasia verruciformis                         | <i>TMC6 (gene 1)</i>                        | 0                  |   |
|                                                                 |                                                                 |                                                         | <i>TMC8 (gene 2)</i>                        | 0                  |   |
|                                                                 | Herpetic encephalitis                                           | Herpetic encephalitis (HSE)                             | <i>TBK1</i>                                 | 0                  |   |
|                                                                 |                                                                 |                                                         | <i>TLR3</i>                                 | 0                  |   |
|                                                                 |                                                                 |                                                         | <i>TRAF3</i>                                | 0                  |   |
|                                                                 |                                                                 |                                                         | <i>TRIF</i>                                 | 0                  |   |
|                                                                 |                                                                 |                                                         | <i>UNC93</i>                                | 0                  |   |
|                                                                 | HOIL1 deficiency                                                | HOIL1 deficiency                                        | none                                        | 0                  |   |
|                                                                 | Predisposition to several viral infection                       | Predisposition to several viral infection               | <i>MCM4</i>                                 | 0                  |   |
|                                                                 |                                                                 |                                                         | <i>STAT2</i>                                | 0                  |   |
| Trypanosomias                                                   | Trypanosomias                                                   | <i>APOL-I</i>                                           | 0                                           |                    |   |
| Unclassified defects in innate immunity                         | Unclassified defects in innate immunity                         | none                                                    | 12                                          |                    |   |
| Warts hypogammaglobulinemia infections and myelokathexis (WHIM) | Warts hypogammaglobulinemia infections and myelokathexis (WHIM) | <i>CXCR4</i>                                            | 5                                           |                    |   |

| Main category                                                | Sub category                                                            | PID diagnosis                                                           | Mutated gene*                     | Number of patients |
|--------------------------------------------------------------|-------------------------------------------------------------------------|-------------------------------------------------------------------------|-----------------------------------|--------------------|
| Diseases of immune dysregulation (136 patients)              | Autoimmune lymphoproliferative syndrome (ALPS)                          | Autoimmune lymphoproliferative syndrome (ALPS)                          | <i>CARD11</i>                     | 0                  |
|                                                              |                                                                         |                                                                         | <i>Caspase 10 (ALPS IIA)</i>      | 0                  |
|                                                              |                                                                         |                                                                         | <i>Caspase 8 (ALPS IIB)</i>       | 0                  |
|                                                              |                                                                         |                                                                         | <i>CD95 (germline - ALPS IA)</i>  | 18                 |
|                                                              |                                                                         |                                                                         | <i>CD95 (somatic - ALPS Im)</i>   | 5                  |
|                                                              |                                                                         |                                                                         | <i>FAS (TNFRSF6)</i>              | 8                  |
|                                                              |                                                                         |                                                                         | <i>FASL (CD178) (ALPS IB)</i>     | 3                  |
|                                                              |                                                                         |                                                                         | <i>PRKCD</i>                      | 0                  |
|                                                              |                                                                         |                                                                         | none                              | 4                  |
|                                                              |                                                                         |                                                                         | ALPS-like disease                 | <i>LRBA</i>        |
|                                                              | <i>FADD</i>                                                             | 0                                                                       |                                   |                    |
|                                                              | Ras associated lymphoproliferative disease (RALD)                       | <i>K-Ras</i>                                                            | 1                                 |                    |
|                                                              |                                                                         | <i>N-Ras</i>                                                            | 0                                 |                    |
|                                                              | Autoimmune polyendocrinopathy candidiasis ectodermal dystrophy (APECED) | Autoimmune polyendocrinopathy candidiasis ectodermal dystrophy (APECED) | <i>AIRE</i>                       | 4                  |
|                                                              |                                                                         |                                                                         | <i>ITCH</i>                       | 0                  |
|                                                              | Early-onset inflammatory bowel disease                                  | Early-onset inflammatory bowel disease                                  | <i>ILR10</i>                      | 0                  |
|                                                              |                                                                         |                                                                         | <i>ILR10 receptor alpha chain</i> | 3                  |
|                                                              |                                                                         |                                                                         | <i>ILR10 receptor beta chain</i>  | 1                  |
|                                                              |                                                                         |                                                                         | none                              | 1                  |
|                                                              | Inflammatory Bowel Disease-like (IBD-like)                              | <i>LRBA</i>                                                             | 1                                 |                    |
|                                                              | Early-onset multi-organ autoimmune disease                              | Early-onset multi-organ AI                                              | <i>CTLA-4</i>                     | 0                  |
|                                                              |                                                                         |                                                                         | <i>STAT3-GOF</i>                  | 2                  |
|                                                              | Hemophagocytic lymphohistiocytosis (HLH)                                | CD27 deficiency                                                         | <i>CD27</i>                       | 1                  |
| <i>CD70</i>                                                  |                                                                         |                                                                         | 0                                 |                    |
| Chediak Higashi syndrome                                     |                                                                         | <i>LYST</i>                                                             | 3                                 |                    |
|                                                              |                                                                         | none                                                                    | 1                                 |                    |
| Familial hemophagocytic lymphohistiocytosis syndromes (FHLH) |                                                                         | Familial hemophagocytic lymphohistiocytosis syndromes (FHLH)            | <i>PRF1</i>                       | 6                  |
|                                                              |                                                                         |                                                                         | <i>STX11</i>                      | 0                  |
|                                                              |                                                                         |                                                                         | <i>STXBP2 (Munc 18-2)</i>         | 5                  |
|                                                              | <i>UNC13D</i>                                                           |                                                                         | 5                                 |                    |
| none                                                         | 4                                                                       |                                                                         |                                   |                    |

| Main category                          | Sub category                                                                                  | PID diagnosis                                                                                 | Mutated gene*                                                   | Number of patients |    |
|----------------------------------------|-----------------------------------------------------------------------------------------------|-----------------------------------------------------------------------------------------------|-----------------------------------------------------------------|--------------------|----|
|                                        |                                                                                               | Griscelli syndrome type 2                                                                     | <i>RAB27A</i>                                                   | 2                  |    |
|                                        |                                                                                               |                                                                                               | none                                                            | 1                  |    |
|                                        |                                                                                               | Hermansky-Pudlak syndrome                                                                     | <i>AP3B1</i>                                                    | 1                  |    |
|                                        |                                                                                               | ITK deficiency (HLH phenotype)                                                                | <i>ITK</i>                                                      | 0                  |    |
|                                        |                                                                                               | X-linked lymphoproliferative syndrome (XLP)                                                   | <i>BIRC4/XIAP (XLP2)</i>                                        | 19                 |    |
|                                        | IPEX                                                                                          | FOXP3 deficiency (IPEX)                                                                       |                                                                 | <i>FOXP3</i>       | 5  |
|                                        |                                                                                               |                                                                                               | Interleukin 2 receptor alpha deficiency (CD25) (IPEX phenotype) | <i>IL2Ralpha</i>   | 1  |
|                                        |                                                                                               |                                                                                               | IPEX-like disease                                               | <i>LRBA</i>        | 0  |
|                                        | Type 1 interferonopathies                                                                     | Type 1 interferonopathies                                                                     |                                                                 | <i>ACP5</i>        | 1  |
|                                        |                                                                                               |                                                                                               |                                                                 | <i>ADAR1</i>       | 0  |
|                                        |                                                                                               |                                                                                               |                                                                 | <i>RNASEH2A</i>    | 0  |
|                                        |                                                                                               |                                                                                               |                                                                 | <i>RNASEH2B</i>    | 0  |
|                                        |                                                                                               |                                                                                               |                                                                 | <i>RNASEH2C</i>    | 0  |
|                                        |                                                                                               |                                                                                               |                                                                 | <i>SAMHD1</i>      | 0  |
|                                        |                                                                                               |                                                                                               |                                                                 | <i>TREX1</i>       | 0  |
|                                        |                                                                                               | <i>STING (TMEM173)</i>                                                                        | 0                                                               |                    |    |
|                                        | Unclassified disorders of immune dysregulation                                                | Unclassified disorders of immune dysregulation                                                | none                                                            | 20                 |    |
| Other well defined PIDs (283 patients) | Asplenia syndrome                                                                             | Asplenia syndrome (Ivemark syndrome)                                                          | none                                                            | 4                  |    |
|                                        |                                                                                               | Isolated congenital asplenia                                                                  | <i>RPSA</i>                                                     | 0                  |    |
|                                        |                                                                                               |                                                                                               | none                                                            | 2                  |    |
|                                        | Cartilage hair hypoplasia                                                                     | Cartilage hair hypoplasia                                                                     | <i>RMRP</i>                                                     | 4                  |    |
|                                        | CHARGE syndrome                                                                               | CHARGE syndrome                                                                               |                                                                 | <i>CHARGE-CHD7</i> | 0  |
|                                        |                                                                                               |                                                                                               |                                                                 | <i>SEMA3E</i>      | 0  |
|                                        | Congenital sideroblastic anemia with immunodeficiency, fevers, and developmental delay (SIFD) | Congenital sideroblastic anemia with immunodeficiency, fevers, and developmental delay (SIFD) | <i>TNRT1</i>                                                    | 0                  |    |
|                                        | Defects of Vitamin B12 and Folate metabolism                                                  | Defects of Vitamin B12 and Folate metabolism                                                  |                                                                 | <i>MTHFD1</i>      | 0  |
|                                        |                                                                                               |                                                                                               |                                                                 | <i>SLC46A1</i>     | 0  |
|                                        |                                                                                               |                                                                                               |                                                                 | <i>TCN2</i>        | 0  |
|                                        | DiGeorge syndrome                                                                             | DiGeorge syndrome                                                                             |                                                                 | <i>Del 10p</i>     | 0  |
|                                        |                                                                                               |                                                                                               |                                                                 | <i>Del 22q11.2</i> | 64 |
|                                        |                                                                                               |                                                                                               |                                                                 | none               | 1  |
|                                        | DNA-breakage disorder                                                                         | AT-like disorder                                                                              |                                                                 | <i>MRE11</i>       | 0  |
|                                        |                                                                                               |                                                                                               | Ataxia telangiectasia (A-T)                                     | <i>ATM</i>         | 63 |
|                                        |                                                                                               |                                                                                               |                                                                 | none               | 3  |

| Main category | Sub category                                                                    | PID diagnosis                                                            | Mutated gene*                 | Number of patients        |   |
|---------------|---------------------------------------------------------------------------------|--------------------------------------------------------------------------|-------------------------------|---------------------------|---|
|               |                                                                                 | Bloom syndrome                                                           | <i>BLM Helicase</i>           | 1                         |   |
|               |                                                                                 |                                                                          | none                          | 0                         |   |
|               |                                                                                 | DNA-ligase 1 ATP-dependent deficiency (LIG1)                             | <i>LIG1</i>                   | 0                         |   |
|               |                                                                                 | Immunodeficiency centromeric instability facial anomalies syndrome (ICF) | <i>DNMT3B</i>                 | 0                         |   |
|               |                                                                                 |                                                                          | <i>ZBTB24</i>                 | 1                         |   |
|               |                                                                                 |                                                                          | none                          | 1                         |   |
|               |                                                                                 | MCM4 deficiency                                                          | <i>MCM4</i>                   | 0                         |   |
|               |                                                                                 | Nijmegen breakage syndrome (NBS1)                                        | <i>NBS1</i>                   | 10                        |   |
|               |                                                                                 | Other DNA-breakage disorder                                              | none                          | 0                         |   |
|               |                                                                                 | Post-Meiotic Segregation 2 (PMS2) deficiency                             | <i>PMS2</i>                   | 1                         |   |
|               | RNF168 deficiency                                                               | <i>RNF168</i>                                                            | 0                             |                           |   |
|               | Seckel syndrome                                                                 | none                                                                     | 0                             |                           |   |
|               | Dyskeratosis congenita                                                          | Dyskeratosis congenita                                                   | <i>DKC1</i>                   | 2                         |   |
|               |                                                                                 |                                                                          | <i>NHP2</i>                   | 0                         |   |
|               |                                                                                 |                                                                          | <i>NOP10</i>                  | 0                         |   |
|               |                                                                                 |                                                                          | <i>RTEL1</i>                  | 1                         |   |
|               |                                                                                 |                                                                          | <i>TERC</i>                   | 3                         |   |
|               |                                                                                 |                                                                          | <i>TERT</i>                   | 0                         |   |
|               |                                                                                 |                                                                          | <i>TINF2</i>                  | 0                         |   |
|               |                                                                                 |                                                                          | none                          | 1                         |   |
|               |                                                                                 |                                                                          | Hoyeraal-Hreidarsson syndrome | <i>APOLLO (snm1b def)</i> | 0 |
|               |                                                                                 |                                                                          |                               | <i>DKC1</i>               | 0 |
|               |                                                                                 | <i>NHP2</i>                                                              |                               | 0                         |   |
|               |                                                                                 | <i>NOP10</i>                                                             |                               | 0                         |   |
|               |                                                                                 | <i>RTEL1</i>                                                             |                               | 0                         |   |
|               |                                                                                 | <i>TERC</i>                                                              |                               | 0                         |   |
|               |                                                                                 | <i>TERT</i>                                                              |                               | 0                         |   |
|               |                                                                                 | <i>TINF2</i>                                                             | 0                             |                           |   |
|               |                                                                                 | Fc receptor deficiencies                                                 | Fc receptor deficiencies      | <i>FCGR1A</i>             | 0 |
|               | <i>FCGR2A</i>                                                                   |                                                                          |                               | 0                         |   |
| <i>FCGR2B</i> | 0                                                                               |                                                                          |                               |                           |   |
| <i>FCGR3A</i> | 0                                                                               |                                                                          |                               |                           |   |
| <i>FCGR3B</i> | 1                                                                               |                                                                          |                               |                           |   |
| <i>FCGRT</i>  | 0                                                                               |                                                                          |                               |                           |   |
| FILS syndrome | Facial dysmorphism, immunodeficiency, livedo, and short stature (FILS syndrome) | <i>POLE1</i>                                                             | 0                             |                           |   |

| Main category                       | Sub category                                                                                         | PID diagnosis                                          | Mutated gene*              | Number of patients |
|-------------------------------------|------------------------------------------------------------------------------------------------------|--------------------------------------------------------|----------------------------|--------------------|
|                                     | GINS1 deficiency                                                                                     | GINS1 deficiency                                       | <i>GINS1</i>               | 0                  |
|                                     | Hyper IgE syndromes                                                                                  | Hyper IgE syndrome (HIES)                              | <i>DOCK8</i>               | 8                  |
|                                     |                                                                                                      |                                                        | <i>STAT3</i>               | 36                 |
|                                     |                                                                                                      |                                                        | <i>STAT3 DN</i>            | 2                  |
|                                     |                                                                                                      |                                                        | <i>Tyk2</i>                | 0                  |
|                                     |                                                                                                      |                                                        | none                       | 9                  |
|                                     | IKAROS deficiency                                                                                    | IKAROS deficiency                                      | <i>IKAROS</i>              | 0                  |
|                                     | Immunodeficiencies with multiple intestinal atresias                                                 | Immunodeficiencies with multiple intestinal atresias   | <i>TTC7A</i>               | 0                  |
|                                     | MonoMAC                                                                                              | Monocytopenia and mycobacterial infection (MonoMAC)    | <i>GATA2</i>               | 3                  |
|                                     | MYSM1 deficiency                                                                                     | MYSM1 deficiency                                       | <i>MYSM1</i>               | 0                  |
|                                     | Netherton syndrome                                                                                   | Netherton syndrome                                     | <i>SPINK5</i>              | 5                  |
|                                     | Other syndromic PID                                                                                  | Activated PI3K-delta syndrome (APDS)                   | <i>PIK3CD (PI3K-delta)</i> | 2                  |
|                                     |                                                                                                      |                                                        | <i>PIK3R1</i>              | 1                  |
|                                     | Schimke disease                                                                                      | Schimke disease                                        | <i>SMARCAL1</i>            | 2                  |
|                                     | Trichohepatoenteric syndrome (Giraud syndrome)                                                       | Trichohepatoenteric syndrome                           | <i>SKIV2L</i>              | 0                  |
|                                     |                                                                                                      |                                                        | <i>TTC37</i>               | 0                  |
|                                     | Unclassified syndromic immunodeficiencies                                                            | Unclassified syndromic immunodeficiencies              | none                       | 16                 |
| VODI                                | Hepatic venoocclusive disease with immunodeficiency (VODI)                                           | <i>SP110</i>                                           | 0                          |                    |
| WILD syndrome                       | Warts, immunodeficiency, lymphedema, dysplasia (WILD) syndrome                                       | none                                                   | 0                          |                    |
| Wiskott-Aldrich syndrome (WAS)      | WIP deficiency<br>Wiskott-Aldrich syndrome (WAS)<br>X-linked thrombocytopenia with mutations in WASP | <i>WIPF1</i>                                           | 0                          |                    |
|                                     |                                                                                                      | <i>WASP (X-linked)</i>                                 | 24                         |                    |
|                                     |                                                                                                      | none                                                   | 5                          |                    |
|                                     |                                                                                                      | <i>WASP (X-linked)</i>                                 | 7                          |                    |
| Phagocytic disorders (199 patients) | Actin beta deficiency                                                                                | Actin beta deficiency (ACTB)                           | <i>Actin beta</i>          | 0                  |
|                                     | Barth syndrome                                                                                       | Barth syndrome                                         | <i>TAZ</i>                 | 0                  |
|                                     | Chronic granulomatous disease (CGD)                                                                  | Chronic granulomatous disease (CGD)                    | <i>GP91-phox (CYBB)</i>    | 80                 |
|                                     |                                                                                                      |                                                        | <i>P22-phox (CYBA)</i>     | 7                  |
|                                     |                                                                                                      |                                                        | <i>P40-phox (NCF4)</i>     | 0                  |
|                                     |                                                                                                      |                                                        | <i>P47-phox (NCF1)</i>     | 24                 |
|                                     |                                                                                                      |                                                        | <i>P67-phox (NCF2)</i>     | 1                  |
|                                     |                                                                                                      |                                                        | none                       | 17                 |
|                                     | Clericuzio-type poikiloderma with neutropenia syndrome                                               | Clericuzio-type poikiloderma with neutropenia syndrome | <i>C16orf57</i>            | 0                  |
|                                     | COHEN syndrome                                                                                       | COHEN syndrome                                         | <i>COH1</i>                | 0                  |
| Congenital neutropenia              | Congenital neutropenia                                                                               | <i>CSF3R</i>                                           | 0                          |                    |
|                                     |                                                                                                      | <i>ELA2</i>                                            | 7                          |                    |

| Main category | Sub category                                                  | PID diagnosis                                                 | Mutated gene*                  | Number of patients |
|---------------|---------------------------------------------------------------|---------------------------------------------------------------|--------------------------------|--------------------|
|               |                                                               |                                                               | <i>G6PC3</i>                   | 4                  |
|               |                                                               |                                                               | <i>GATA2</i>                   | 2                  |
|               |                                                               |                                                               | <i>GFI1</i>                    | 0                  |
|               |                                                               |                                                               | <i>HAX1</i>                    | 4                  |
|               |                                                               |                                                               | <i>JAGN1</i>                   | 1                  |
|               |                                                               |                                                               | <i>P14</i>                     | 0                  |
|               |                                                               |                                                               | <i>WASP (X-linked)</i>         | 2                  |
|               |                                                               |                                                               | none                           | 12                 |
|               | Cyclic neutropenia                                            | Cyclic neutropenia                                            | <i>ELA2</i>                    | 4                  |
|               | Defects with susceptibility to mycobacterial infection (MSMD) | Defects with susceptibility to mycobacterial infection (MSMD) | <i>GP91-phox(CYBB)</i>         | 0                  |
|               |                                                               |                                                               | <i>IFNGR1</i>                  | 4                  |
|               |                                                               |                                                               | <i>IFNGR2</i>                  | 0                  |
|               |                                                               |                                                               | <i>IL12B</i>                   | 0                  |
|               |                                                               |                                                               | <i>IL12R beta-1</i>            | 0                  |
|               |                                                               |                                                               | <i>IL18</i>                    | 0                  |
|               |                                                               |                                                               | <i>IL23-alpha</i>              | 0                  |
|               |                                                               |                                                               | <i>IRAK4</i>                   | 0                  |
|               |                                                               |                                                               | <i>IRF8</i>                    | 0                  |
|               |                                                               |                                                               | <i>ISG15</i>                   | 0                  |
|               |                                                               |                                                               | <i>STAT1</i>                   | 3                  |
|               |                                                               |                                                               | <i>STAT5</i>                   | 0                  |
|               |                                                               |                                                               | none                           | 2                  |
|               | Glycogen storage disease type 1b (GS1b)                       | Glycogen storage disease type 1b (GS1b)                       | <i>G6PT1</i>                   | 1                  |
|               | Leukocyte adhesion deficiency (LAD)                           | Leukocyte adhesion deficiency (LAD)                           | <i>LAD1 / ITGB2</i>            | 1                  |
|               |                                                               |                                                               | <i>LAD2 / FUCT1</i>            | 1                  |
|               |                                                               |                                                               | <i>LAD3</i>                    | 0                  |
|               | Localized juvenile peridontitis                               | Localized juvenile peridontitis                               | <i>Formyl peptide receptor</i> | 0                  |
|               | Myeloperoxidase deficiency (MPO)                              | Myeloperoxidase deficiency (MPO)                              | <i>MPO</i>                     | 0                  |
|               | Neutrophil glucose-6-phosphate dehydrogenase                  | Glucose-6-phosphate dehydrogenase deficiency (G6PD)           | <i>G6PD</i>                    | 1                  |
|               | Papillon-Lefevre syndrome                                     | Papillon-Lefevre syndrome                                     | <i>CTSC</i>                    | 0                  |
|               | PID with partial albinism                                     | Partial albinism and immunodeficiency syndrome                | none                           | 0                  |
|               | Pulmonary alveolar proteinosis                                | Pulmonary alveolar proteinosis                                | <i>CSF2RA</i>                  | 0                  |
|               | RAC2-GTPase defect                                            | RAS-related C3 botulinum toxin substrate 2 deficiency (RAC2)  | <i>RAC2</i>                    | 0                  |
|               | Shwachman-Diamond-syndrome                                    | Shwachman-Diamond-syndrome                                    | <i>SBDS</i>                    | 11                 |
|               | Specific granule defect                                       | CCAAT/enhancer binding protein epsilon deficiency (CEBPE)     | <i>CEBPE</i>                   | 0                  |

| Main category                                        | Sub category                                              | PID diagnosis                                     | Mutated gene*                                                    | Number of patients                                               |                          |    |
|------------------------------------------------------|-----------------------------------------------------------|---------------------------------------------------|------------------------------------------------------------------|------------------------------------------------------------------|--------------------------|----|
|                                                      | Unclassified phagocytic disorders                         | Unclassified phagocytic disorders                 | none                                                             | 10                                                               |                          |    |
| Predominantly antibody disorders<br>(1,390 patients) | Agammaglobulinemias                                       | Agammaglobulinemia                                | <i>BLNK/SLP65</i>                                                | 0                                                                |                          |    |
|                                                      |                                                           |                                                   | <i>BTK (X-linked)</i>                                            | 91                                                               |                          |    |
|                                                      |                                                           |                                                   | <i>CD79A</i>                                                     | 1                                                                |                          |    |
|                                                      |                                                           |                                                   | <i>CD79B</i>                                                     | 0                                                                |                          |    |
|                                                      |                                                           |                                                   | <i>IGHM</i>                                                      | 3                                                                |                          |    |
|                                                      |                                                           |                                                   | <i>IGLL1</i>                                                     | 1                                                                |                          |    |
|                                                      |                                                           |                                                   | <i>LRRC8</i>                                                     | 0                                                                |                          |    |
|                                                      |                                                           |                                                   | <i>PIK3R1</i>                                                    | 0                                                                |                          |    |
|                                                      |                                                           |                                                   | <i>TCF3</i>                                                      | 0                                                                |                          |    |
|                                                      |                                                           |                                                   | none                                                             | 16                                                               |                          |    |
|                                                      | Class switch recombination defects (CSR) / HIGM syndromes | CSR defects and Hyper IgM (HIGM) syndromes        | <i>AID</i>                                                       | 6                                                                |                          |    |
|                                                      |                                                           |                                                   | <i>CD40 (TNFRSF5)</i>                                            | 3                                                                |                          |    |
|                                                      |                                                           |                                                   | <i>CD40L (CD154)</i>                                             | 16                                                               |                          |    |
|                                                      |                                                           |                                                   | <i>PMS2</i>                                                      | 1                                                                |                          |    |
|                                                      |                                                           |                                                   | <i>UNG</i>                                                       | 1                                                                |                          |    |
|                                                      |                                                           |                                                   | none                                                             | 11                                                               |                          |    |
|                                                      | Hypogammaglobulinemias                                    | Common variable immunodeficiency disorders (CVID) | <i>BAFFR</i>                                                     | 1                                                                |                          |    |
|                                                      |                                                           |                                                   | <i>CD19</i>                                                      | 2                                                                |                          |    |
|                                                      |                                                           |                                                   | <i>CD20</i>                                                      | 0                                                                |                          |    |
|                                                      |                                                           |                                                   | <i>CD21</i>                                                      | 0                                                                |                          |    |
|                                                      |                                                           |                                                   | <i>CD81</i>                                                      | 1                                                                |                          |    |
|                                                      |                                                           |                                                   | <i>ICOS</i>                                                      | 2                                                                |                          |    |
|                                                      |                                                           |                                                   | <i>LRBA</i>                                                      | 1                                                                |                          |    |
|                                                      |                                                           |                                                   | <i>NFKB1</i>                                                     | 1                                                                |                          |    |
|                                                      |                                                           |                                                   | <i>NFKB2</i>                                                     | 3                                                                |                          |    |
|                                                      |                                                           |                                                   | <i>TACI</i>                                                      | 10                                                               |                          |    |
|                                                      |                                                           |                                                   | <i>TWEAK</i>                                                     | 0                                                                |                          |    |
|                                                      |                                                           |                                                   | none                                                             | 707                                                              |                          |    |
|                                                      |                                                           |                                                   | Deficiency of specific IgG (Specific antibody deficiency - SPAD) | Deficiency of specific IgG (Specific antibody deficiency - SPAD) | none                     | 18 |
|                                                      |                                                           |                                                   |                                                                  |                                                                  | <i>TACI</i>              | 0  |
|                                                      |                                                           |                                                   | IgA with IgG subclass deficiency                                 | IgA with IgG subclass deficiency                                 | none                     | 26 |
|                                                      |                                                           |                                                   |                                                                  |                                                                  | <i>Heavy chain</i>       | 0  |
|                                                      |                                                           |                                                   | Immunoglobulin chain deficiencies                                | Immunoglobulin chain deficiencies                                | <i>Kappa light chain</i> | 0  |
| <i>Lambda light chain</i>                            |                                                           |                                                   |                                                                  |                                                                  | 0                        |    |
| <i>BAFFR</i>                                         |                                                           |                                                   |                                                                  |                                                                  | 0                        |    |
| Isolated IgG subclass deficiency                     |                                                           |                                                   | Isolated IgG subclass deficiency                                 | <i>CD19</i>                                                      | 0                        |    |
|                                                      | <i>CD21</i>                                               | 0                                                 |                                                                  |                                                                  |                          |    |
|                                                      | <i>CD21</i>                                               | 0                                                 |                                                                  |                                                                  |                          |    |

| Main category                                 | Sub category                               | PID diagnosis                       | Mutated gene*              | Number of patients |
|-----------------------------------------------|--------------------------------------------|-------------------------------------|----------------------------|--------------------|
|                                               |                                            |                                     | <i>CD81</i>                | 0                  |
|                                               |                                            |                                     | <i>ICOS</i>                | 0                  |
|                                               |                                            |                                     | <i>TACI</i>                | 0                  |
|                                               |                                            |                                     | none                       | 101                |
|                                               |                                            | Other immunoglobulin gene deletions | none                       | 0                  |
|                                               |                                            | Selective IgA deficiency            | <i>TACI</i>                | 0                  |
|                                               |                                            |                                     | none                       | 69                 |
|                                               |                                            | Selective IgM deficiency            | none                       | 5                  |
|                                               |                                            | Thymoma with immunodeficiency       | none                       | 2                  |
|                                               |                                            | Transcobalamin II deficiency        | <i>Transcobalamine II</i>  | 0                  |
|                                               | Transient hypogammaglobulinemia of infancy | none                                | 21                         |                    |
|                                               | Unclassified antibody deficiency           | Unclassified antibody deficiency    | <i>11q23</i>               | 2                  |
|                                               |                                            |                                     | <i>LRBA</i>                | 1                  |
|                                               |                                            |                                     | <i>NFKB1</i>               | 0                  |
|                                               |                                            |                                     | <i>PIK3CD (PI3K-delta)</i> | 1                  |
| <i>PRKCD</i>                                  |                                            |                                     | 0                          |                    |
|                                               | none                                       | 263                                 |                            |                    |
|                                               | Steinert myotonia dystrophia               | <i>ZNF9</i>                         | 3                          |                    |
| Unclassified immunodeficiencies (76 patients) | Unclassified immunodeficiencies            | Unclassified immunodeficiencies     | <i>TACI</i>                | 1                  |
|                                               |                                            |                                     | none                       | 75                 |
| No PID documented                             |                                            |                                     |                            | 19                 |
| <b>Total</b>                                  |                                            |                                     |                            | <b>2,453</b>       |

S2: ESID Online Registry: List of diseases and genes with registered patients.

\* Number of patients with a disease-causing mutation identified in this particular gene.



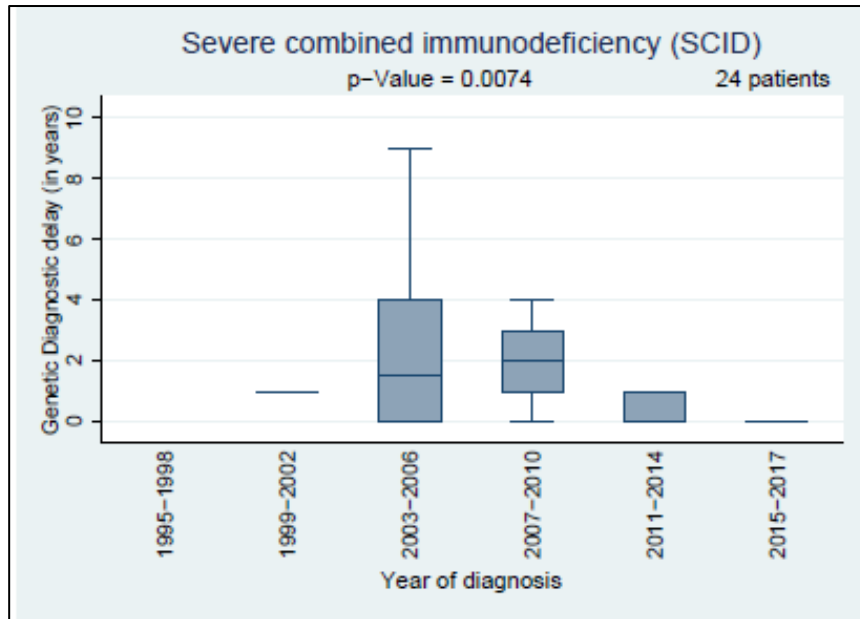

S3: Genetic delay in 24 SCID patients

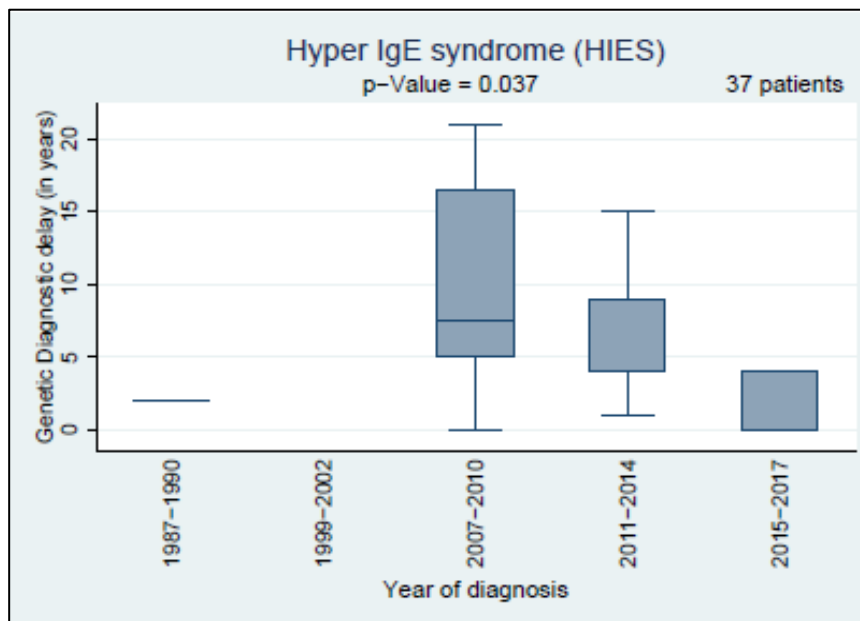

S4: Genetic delay in 37 HIES patients

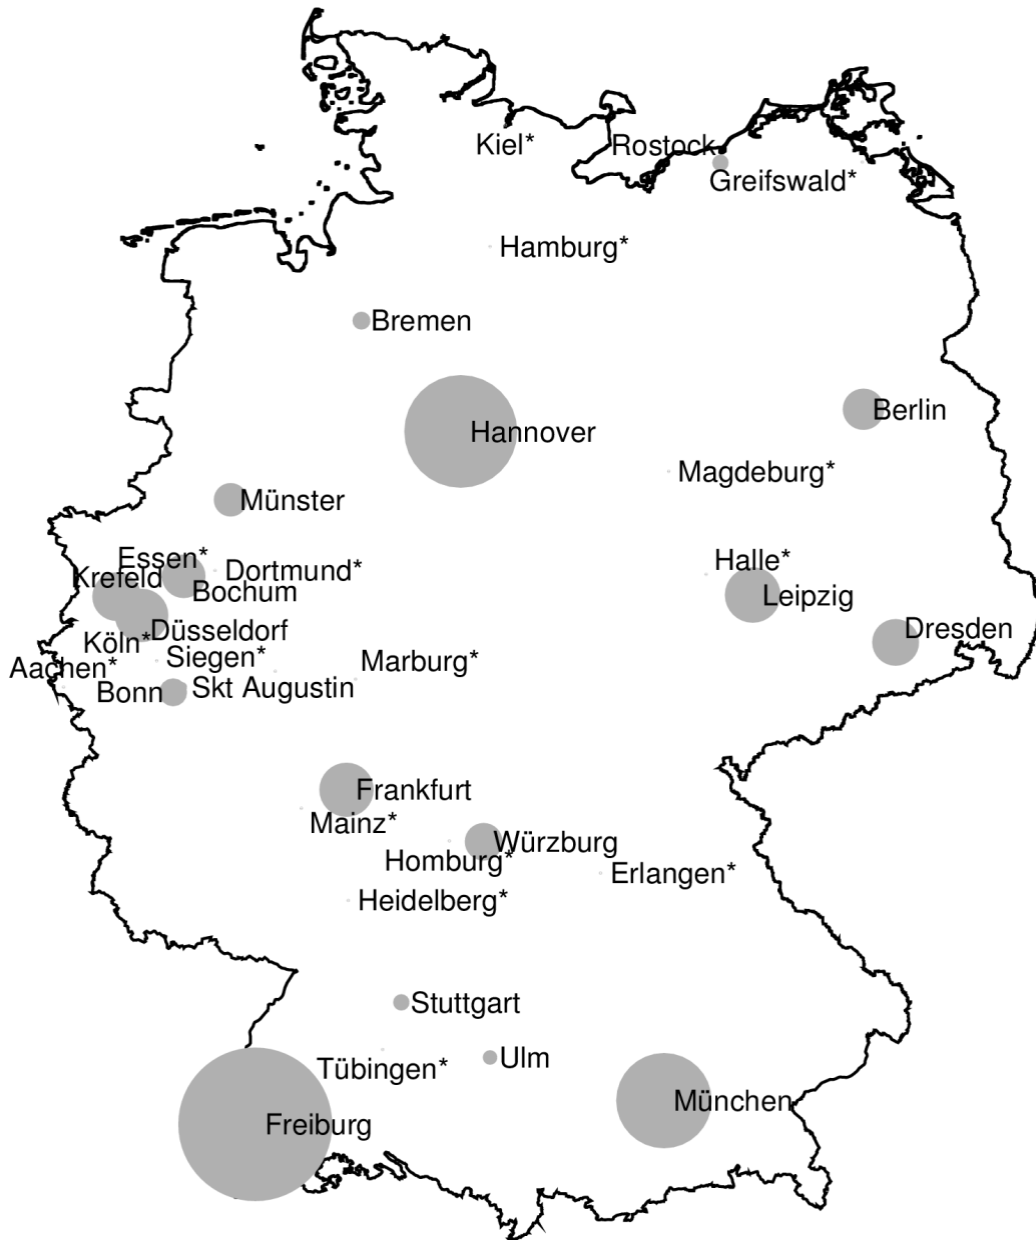

S5: Registered PID-distribution in Germany, March 2012.

Size of the circles is proportional to the numbers of patients. The map is adapted with permission from [www.gadm.org](http://www.gadm.org). [3]

| Main category/PID/Gene           | Number of patients | Number of patients [%] |
|----------------------------------|--------------------|------------------------|
| Predominantly antibody disorders | 1,39               | 56,67%                 |
| CVID                             | 728                | 29,68%                 |
| (no gene documented)             | 707                | 28,82%                 |
| <i>TACI</i>                      | 10                 | 0,41%                  |
| <i>NFKB2</i>                     | 3                  | 0,12%                  |
| <i>CD19</i>                      | 2                  | 0,08%                  |
| <i>ICOS</i>                      | 2                  | 0,08%                  |
| <i>NFKB1</i>                     | 1                  | 0,04%                  |
| <i>BAFFR</i>                     | 1                  | 0,04%                  |
| <i>CD81</i>                      | 1                  | 0,04%                  |
| <i>LRBA</i>                      | 1                  | 0,04%                  |
| Unclassified antibody deficiency | 267                | 10,88%                 |
| (no gene documented)             | 263                | 10,72%                 |
| <i>11q23</i>                     | 2                  | 0,08%                  |
| <i>PIK3CD (PI3K-delta)</i>       | 1                  | 0,04%                  |
| <i>LRBA</i>                      | 1                  | 0,04%                  |
| Agammaglobulinemia               | 112                | 4,57%                  |
| <i>BTK (X-linked)</i>            | 91                 | 3,71%                  |
| (no gene documented)             | 16                 | 0,65%                  |
| <i>IGHM</i>                      | 3                  | 0,12%                  |
| <i>CD79A</i>                     | 1                  | 0,04%                  |
| <i>IGLL1</i>                     | 1                  | 0,04%                  |
| Isolated IgG subclass deficiency | 101                | 4,12%                  |
| (no gene documented)             | 101                | 4,12%                  |
| Selective IgA deficiency         | 69                 | 2,81%                  |
| (no gene documented)             | 69                 | 2,81%                  |
| Other well defined PIDs          | 283                | 11,54%                 |
| A-T                              | 66                 | 2,69%                  |
| <i>ATM</i>                       | 63                 | 2,57%                  |
| (no gene documented)             | 3                  | 0,12%                  |
| DGS                              | 65                 | 2,65%                  |
| <i>Del 22q11.2</i>               | 64                 | 2,61%                  |
| (no gene documented)             | 1                  | 0,04%                  |
| HIES                             | 55                 | 2,24%                  |
| <i>STAT3</i>                     | 36                 | 1,47%                  |
| (no gene documented)             | 9                  | 0,37%                  |
| <i>DOCK8</i>                     | 8                  | 0,33%                  |
| <i>STAT3-DN</i>                  | 2                  | 0,08%                  |

| Main Category/PID/Gene          | Number of patients | Number of patients [%] |
|---------------------------------|--------------------|------------------------|
| Phagocytic disorders            | 199                | 8,11%                  |
| CGD                             | 129                | 5,26%                  |
| <i>GP91-phox(CYBB)</i>          | 80                 | 3,26%                  |
| <i>P47-phox (NCF1)</i>          | 24                 | 0,98%                  |
| (no gene documented)            | 17                 | 0,69%                  |
| <i>P22-phox (CYBA)</i>          | 7                  | 0,29%                  |
| <i>P67-phox (NCF2)</i>          | 1                  | 0,04%                  |
| Combined immunodeficiencies     | 177                | 7,26%                  |
| SCID                            | 83                 | 3,42%                  |
| (no gene documented)            | 19                 | 0,82%                  |
| <i>IL2RG</i> (X-linked)         | 18                 | 0,73%                  |
| <i>RAG1</i>                     | 14                 | 0,57%                  |
| <i>Artemis</i>                  | 11                 | 0,45%                  |
| <i>ADA</i>                      | 10                 | 0,41%                  |
| <i>RAG2</i>                     | 6                  | 0,24%                  |
| <i>IL7Ralpha</i>                | 3                  | 0,12%                  |
| <i>JAK3</i>                     | 2                  | 0,08%                  |
| Combined ID                     | 74                 | 3,02%                  |
| (no gene documented)            | 41                 | 1,67%                  |
| <i>PNP</i>                      | 6                  | 0,24%                  |
| <i>DOCK8</i>                    | 5                  | 0,20%                  |
| <i>PIK3CD (PI3K-delta)</i>      | 4                  | 0,16%                  |
| <i>CTLA-4</i>                   | 4                  | 0,16%                  |
| <i>Cernunnos</i>                | 3                  | 0,12%                  |
| <i>Artemis</i>                  | 2                  | 0,08%                  |
| <i>Orai1 (TMEM142A)</i>         | 2                  | 0,08%                  |
| <i>PRKDC</i>                    | 2                  | 0,08%                  |
| <i>LIG4</i>                     | 2                  | 0,08%                  |
| <i>STIM1</i>                    | 1                  | 0,04%                  |
| <i>ITK</i>                      | 1                  | 0,04%                  |
| <i>LRBA</i>                     | 1                  | 0,04%                  |
| Unclassified immunodeficiencies | 76                 | 3,06%                  |
| Unclassified IDs                | 76                 | 3,06%                  |
| (no gene documented)            | 75                 | 3,02%                  |
| <i>TACI</i>                     | 1                  | 0,04%                  |
| <b>Total</b>                    | <b>1,825</b>       | <b>74,40%</b>          |

S6: The 12 foremost PIDs and genes within their main category

| Main PID Category                                                                        | Number of patients<br>March 2012 |       | Number of patients<br>4.7.2017 |       |
|------------------------------------------------------------------------------------------|----------------------------------|-------|--------------------------------|-------|
|                                                                                          |                                  |       |                                |       |
| Predominantly antibody disorders                                                         | 858                              | (63%) | 1390                           | (57%) |
| Other well defined PIDs                                                                  | 171                              | (13%) | 283                            | (12%) |
| Phagocytic disorders                                                                     | 111                              | (8%)  | 199                            | (8%)  |
| Predominantly T-cell deficiencies*<br>= Combined immunodeficiencies**                    | 60                               | (4%)  | 177                            | (7%)  |
| Autoimmune and immunedysregulation<br>syndromes*<br>= Diseases of immune dysregulation** | 46                               | (3%)  | 136                            | (6%)  |
| Autoinflammatory syndromes*<br>= Autoinflammatory disorders                              | 42                               | (3%)  | 84                             | (3%)  |
| Unclassified immunodeficiencies                                                          | 54                               | (4%)  | 76                             | (3%)  |
| Defects in innate immunity                                                               | 13                               | (1%)  | 45                             | (2%)  |
| Complement deficiencies                                                                  | 13                               | (1%)  | 44                             | (2%)  |
| No PID documented                                                                        |                                  |       | 19                             | (1%)  |
| <b>Total</b>                                                                             | <b>1,368</b>                     |       | <b>2,453</b>                   |       |

S7: Main categories of PID: Differences in grouping main categories (2012 and 2017)

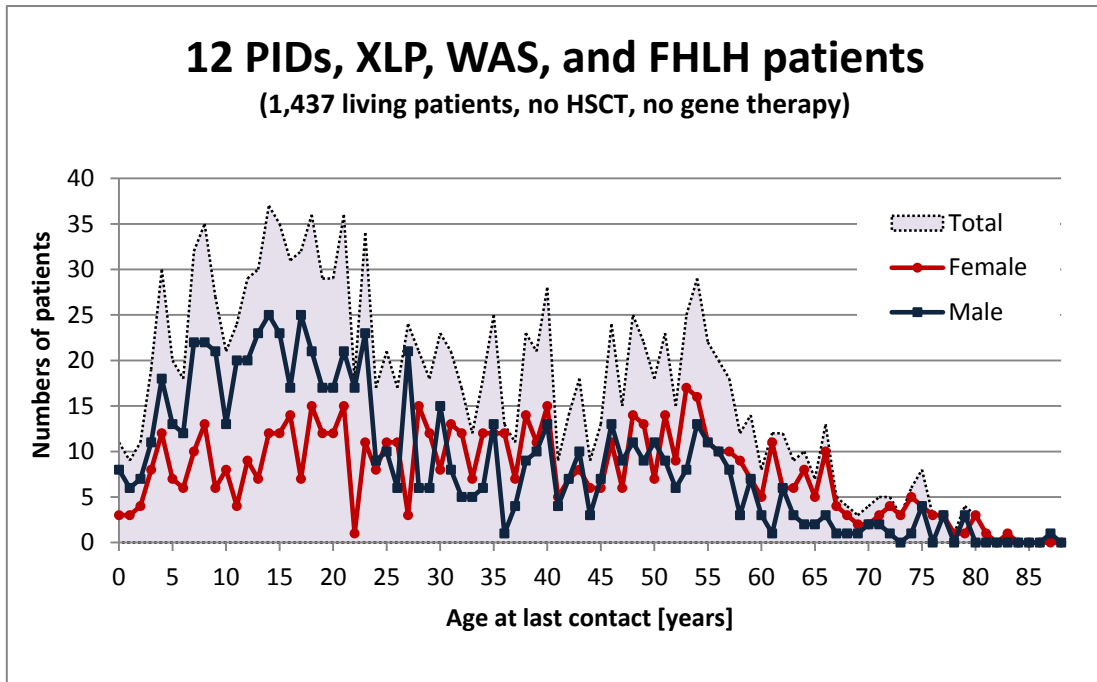

S8: Age and gender distribution of 1,437 living patients of the 12 PIDs patients groups, XLP, WAS, and FHLH patients (no HSCT or gene therapy)

(For further details, see “Age distribution by year of birth” page 69ff).

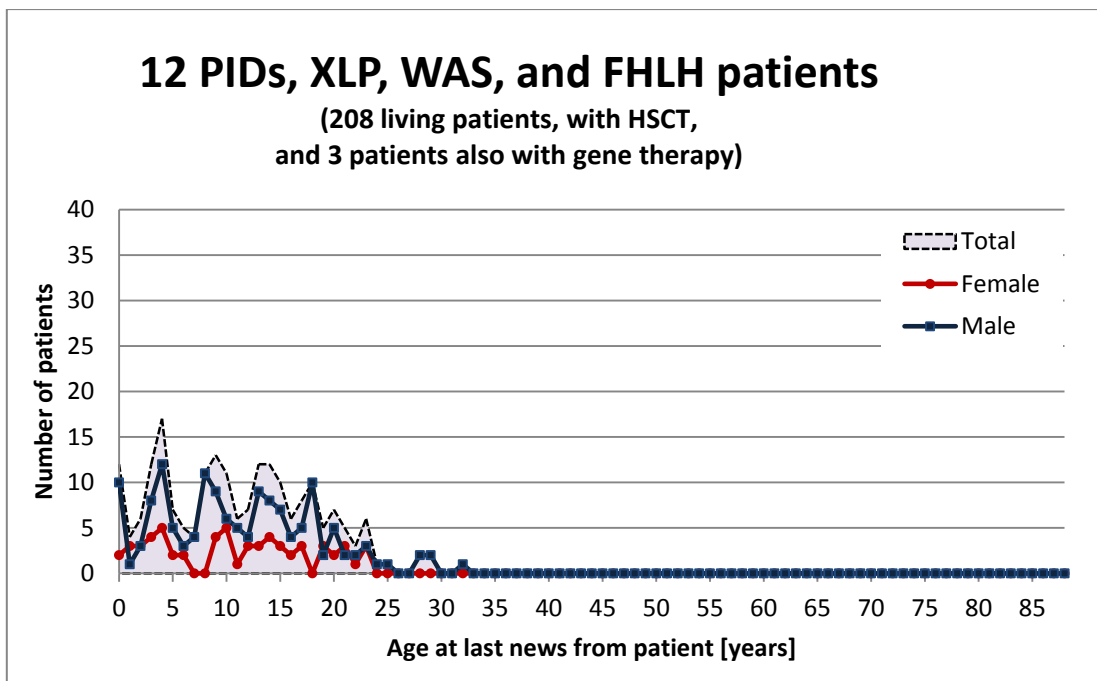

S9: Age and gender distribution of 208 living patients of the 12 PIDs patients groups, XLP, WAS, and FHLH patients (with HSCT, and 3 patients also with gene therapy)

(For further details, please see “Age distribution by year of birth” page 69ff).

| 12 PIDs, WAS, XLP, FHLH                 | Male [n]   | Female [n] | Total (HSCT/ no gene therapy) |            | Age range [years] | Median age [years] | Living patients with and without HSCT/gene therapy |
|-----------------------------------------|------------|------------|-------------------------------|------------|-------------------|--------------------|----------------------------------------------------|
| <b>CVID</b>                             | 1          | 0          | 1                             | 0,15%      | 12                | 12                 | 666                                                |
| <b>Unclassified antibody def.</b>       |            |            | 0                             |            |                   |                    | 223                                                |
| <b>CGD</b>                              | 46         | 5          | 51                            | 45%        | 0 - 29            | 12                 | 114                                                |
| <b>Agammaglobulinemia</b>               | 2          |            | 2                             | 2%         | 12 - 17           | 15                 | 99                                                 |
| <b>Isolated IgG subclass deficiency</b> |            |            | 0                             | 0%         | -                 | -                  | 82                                                 |
| <b>SCID</b>                             | 37         | 27         | 64                            | 83%        | 0 - 28            | 10                 | 77                                                 |
| <b>Unclassified IDs</b>                 | 1          | 2          | 3                             | 7%         | 14 - 19           | 19                 | 44                                                 |
| <b>Combined ID</b>                      | 14         | 11         | 25                            | 40%        | 0 - 24            | 10                 | 63                                                 |
| <b>DGS</b>                              |            |            | 0                             | 0%         | -                 | -                  | 52                                                 |
| <b>Selective IgA deficiency</b>         |            |            | 0                             | 0%         | -                 | -                  | 47                                                 |
| <b>A-T</b>                              | 1          |            | 1                             | 2%         | 9                 | 9                  | 57                                                 |
| <b>HIES</b>                             | 2          | 6          | 8                             | 15%        | 2 - 23            | 16                 | 55                                                 |
| <b>WAS</b>                              | 18         |            | 18                            | 64%        | 0 - 25            | 9                  | 28                                                 |
| <b>XLP</b>                              | 7          |            | 7                             | 32%        | 8 - 32            | 21                 | 22                                                 |
| <b>FHLH</b>                             | 7          | 8          | 15                            | 83%        | 2 - 23            | 5                  | 18                                                 |
| <b>Total</b>                            | <b>136</b> | <b>60</b>  | <b>195</b>                    | <b>12%</b> | <b>0 - 32</b>     |                    | <b>1,647</b>                                       |

S10: Age range and median age at last news from patient in years of the 12 most prevalent PID diagnoses and WAS, XLP and FHLH (patients with HSCT but no gene therapy), living patients

| PID          | Male [n] | Female [n] | Total (gene therapy) |             | Age at gene therapy              | Living patients with and without HSCT/gene therapy |
|--------------|----------|------------|----------------------|-------------|----------------------------------|----------------------------------------------------|
| <b>SCID</b>  | 2        | 0          | 2                    | 0,3%        | 8 month and 8 years*, 16 month** | 666                                                |
| <b>CGD</b>   | 1        | 0          | 1                    | 0,4%        | 4 years 9 months**               | 223                                                |
| <b>WAS</b>   | 2        | 0          | 2                    | 2%          | 2 years 5 month, 4 years**       | 114                                                |
| <b>Total</b> | <b>5</b> | <b>0</b>   | <b>5</b>             | <b>0,5%</b> | <b>N/A</b>                       | <b>1,003</b>                                       |

\* gene therapy was attempted twice

\*\* received HSCT the same day / following gene therapy

S11: Age at gene therapy

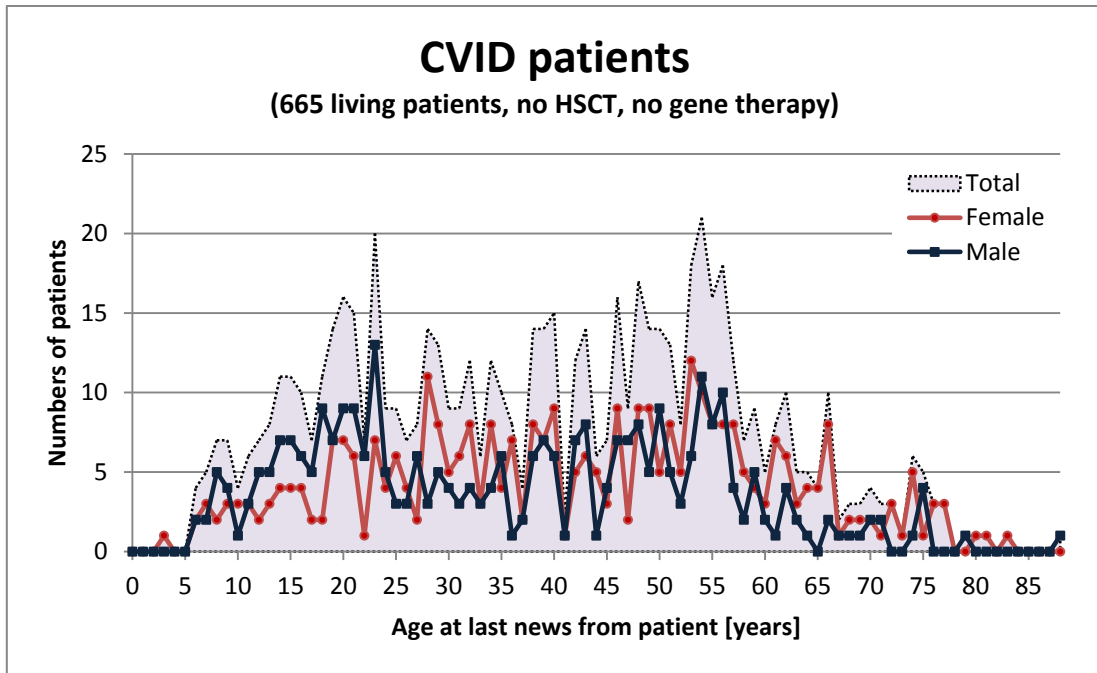

S12: Age and gender distribution of 665 living CVID patients. No patients received an HSCT or gene therapy.

(For further details, see “Age distribution by year of birth” page 69ff)

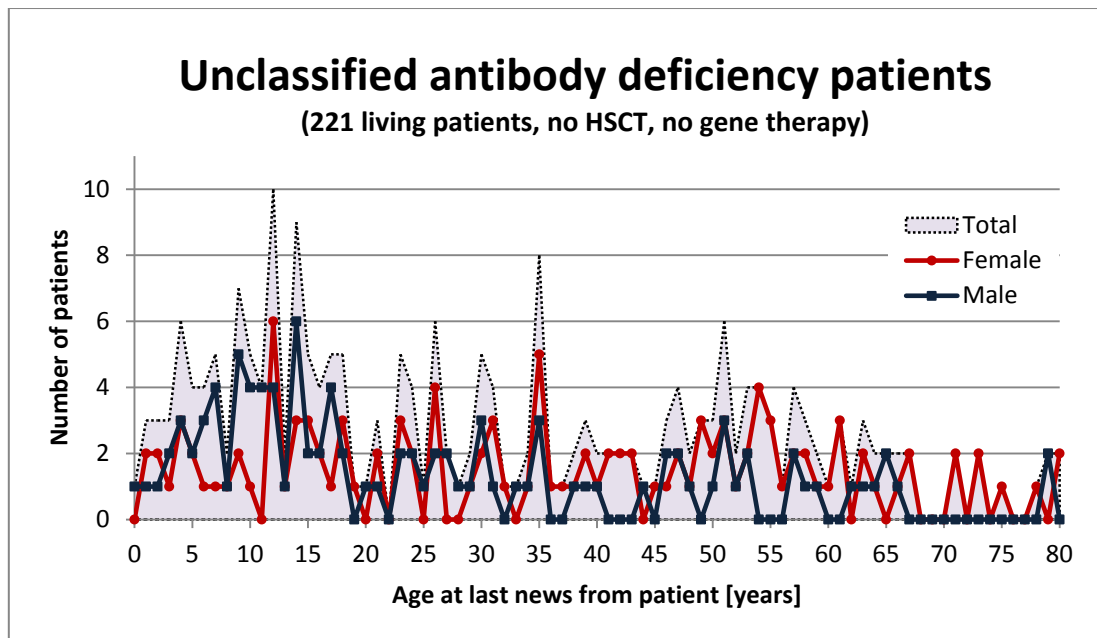

S13: Age and gender distribution of 221 living unclassified antibody deficiency patients. No patients received an HSCT or gene therapy.



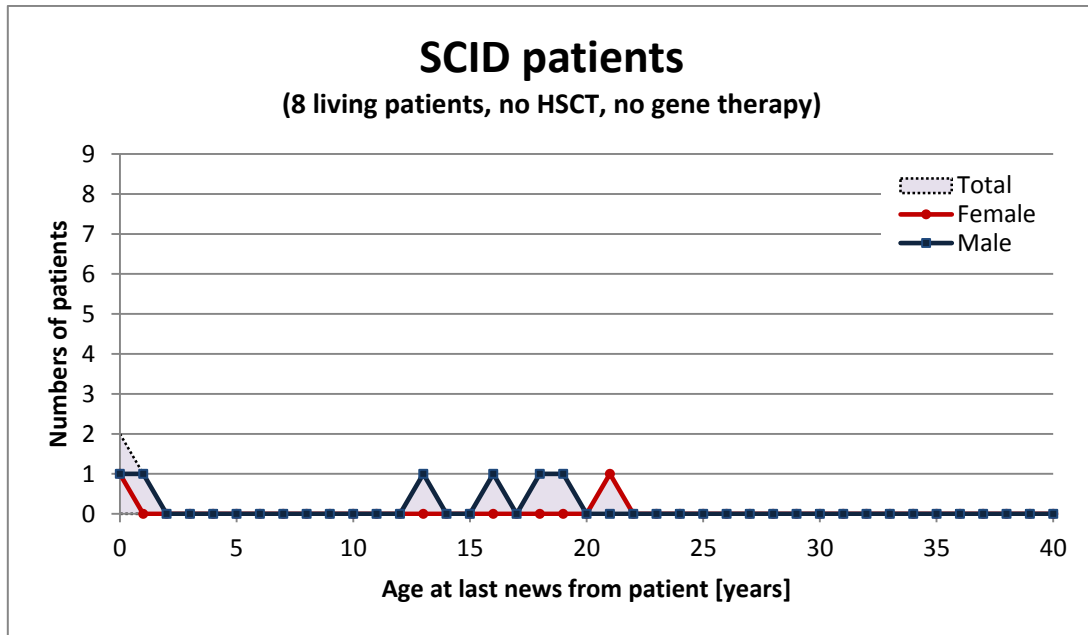

S14: Age and gender distribution of 8 living SCID patients. No patients received an HSCT or gene therapy.

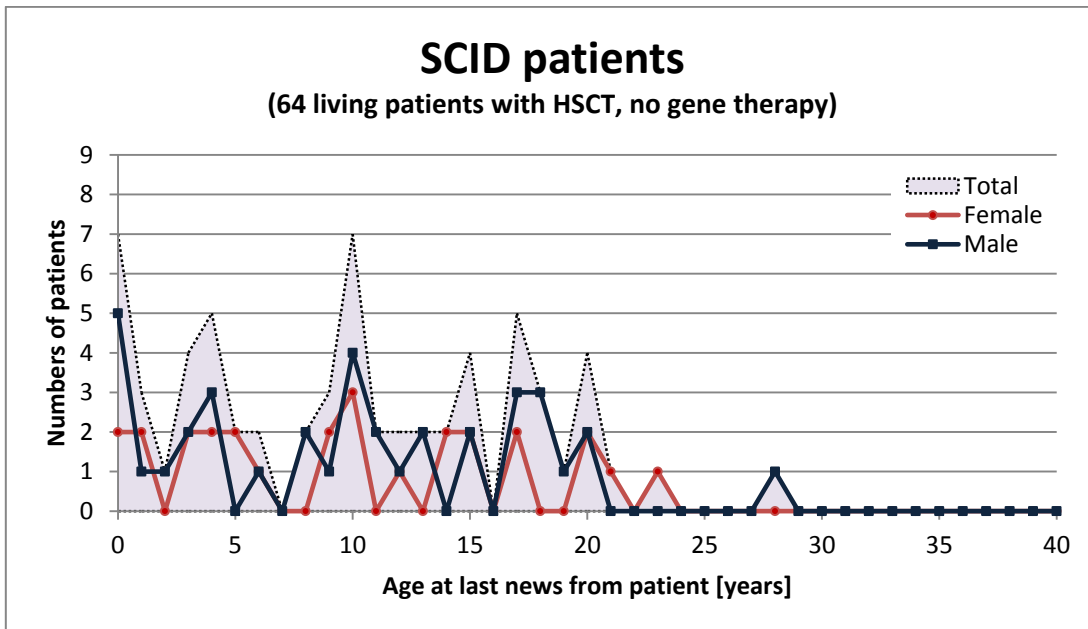

S15: Age and gender distribution of 64 living SCID patients (with HSCT, no gene therapy).

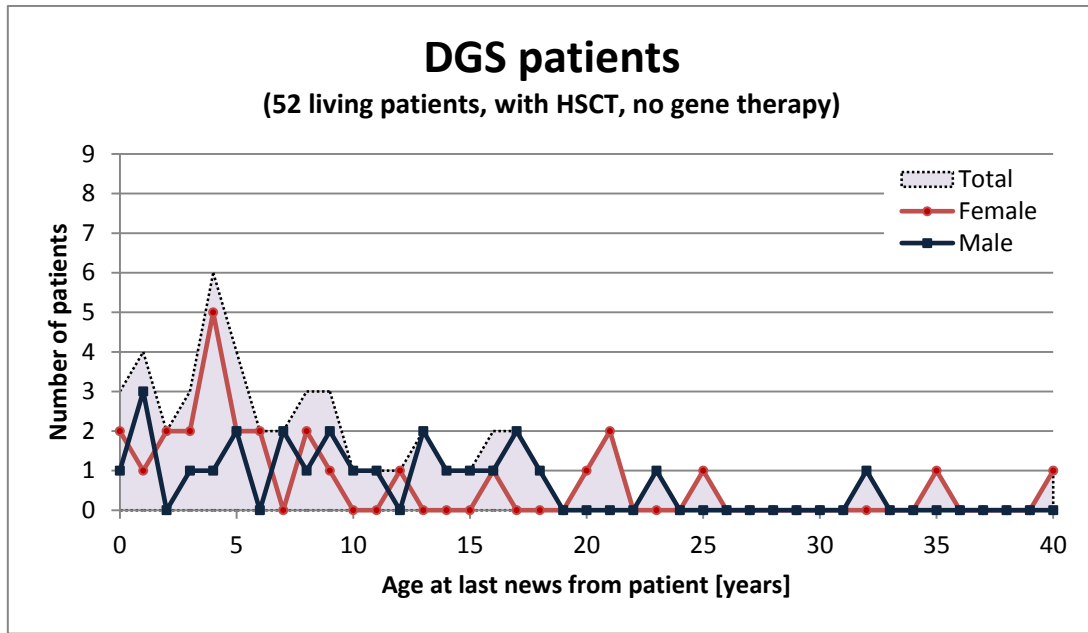

S16: Age and gender distribution of 52 living DGS patients (with HSCT, no gene therapy).

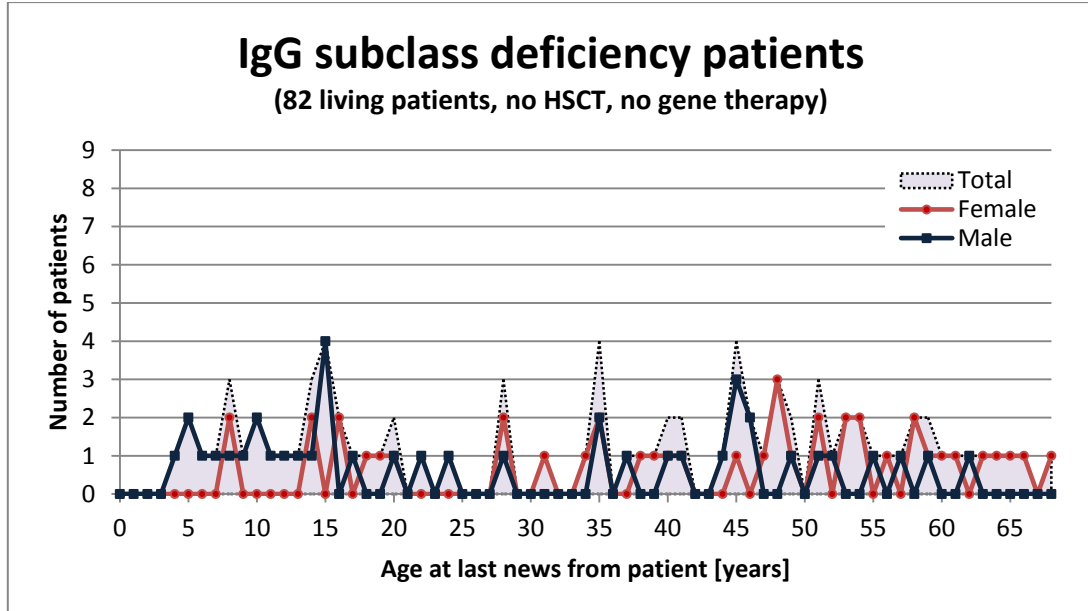

S17: Age and gender distribution of 82 living isolated IgG subclass deficiency patients. No patients received an HSCT or gene therapy.

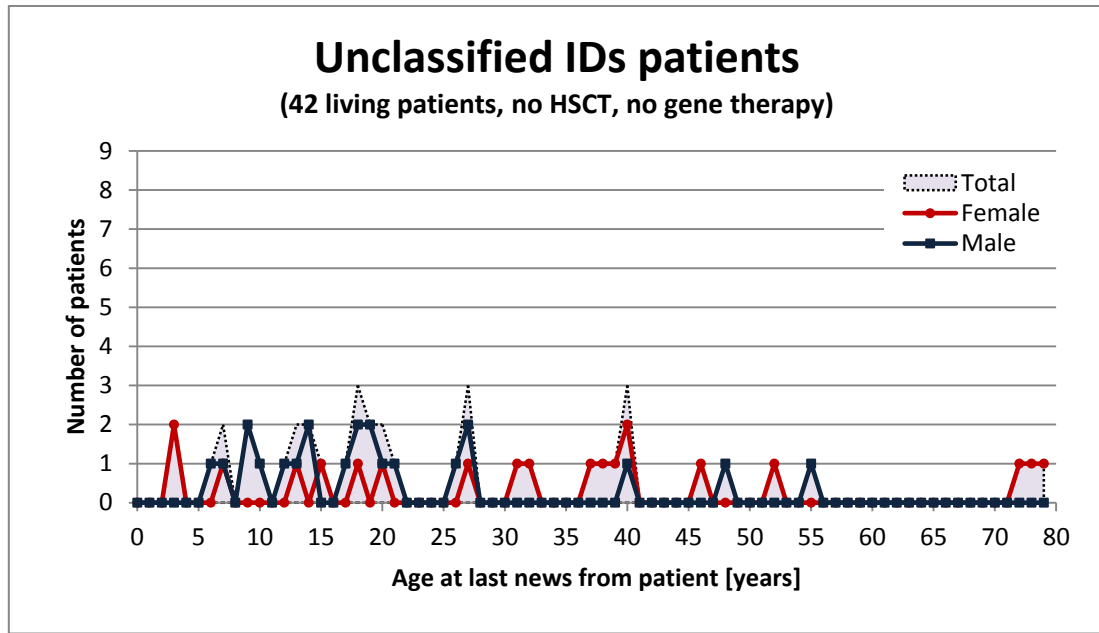

S18: Age and gender distribution of 42 living unclassified IDs. No patients received an HSCT or gene therapy.

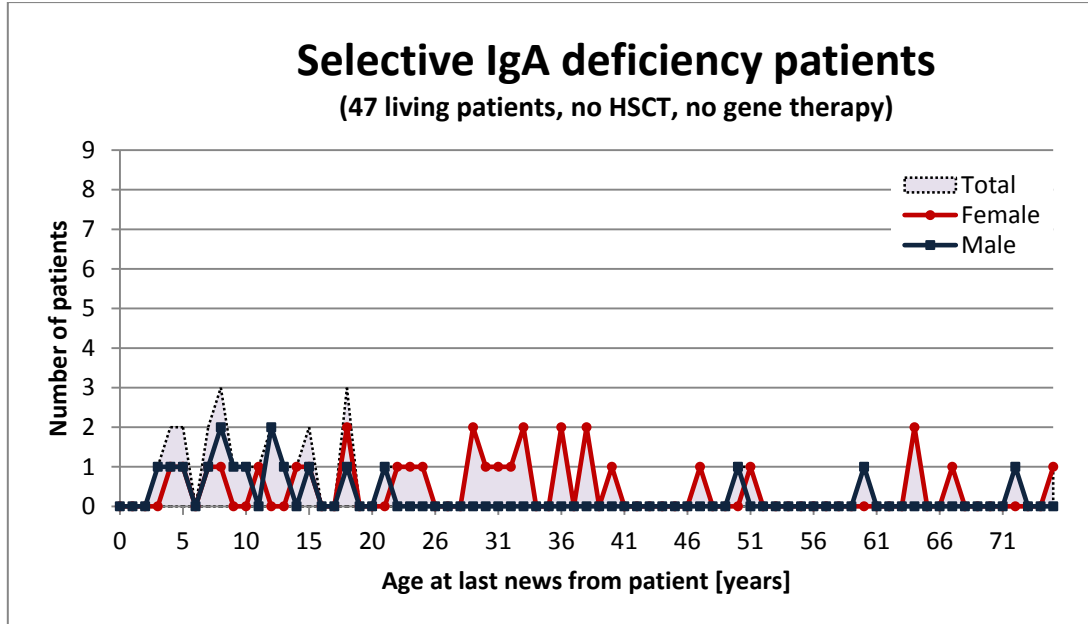

S19: Age and gender distribution of 47 living selective IgA deficiency patients. No patients received an HSCT or gene therapy.

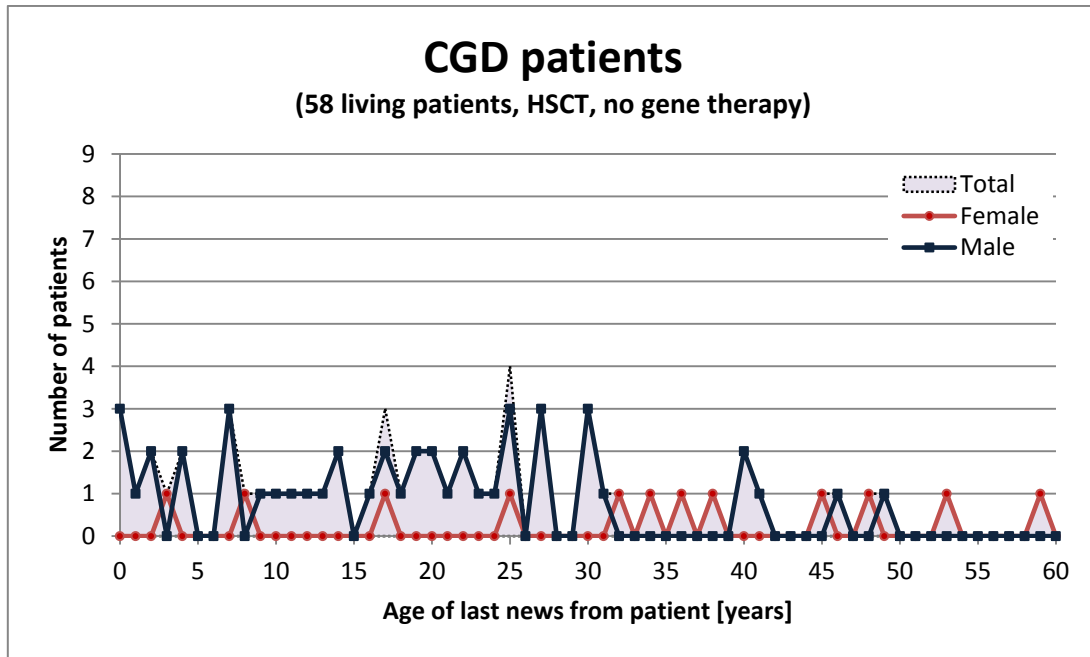

S20: Age and gender distribution of 58 living CGD patients. No patients received an HSCT or gene therapy.

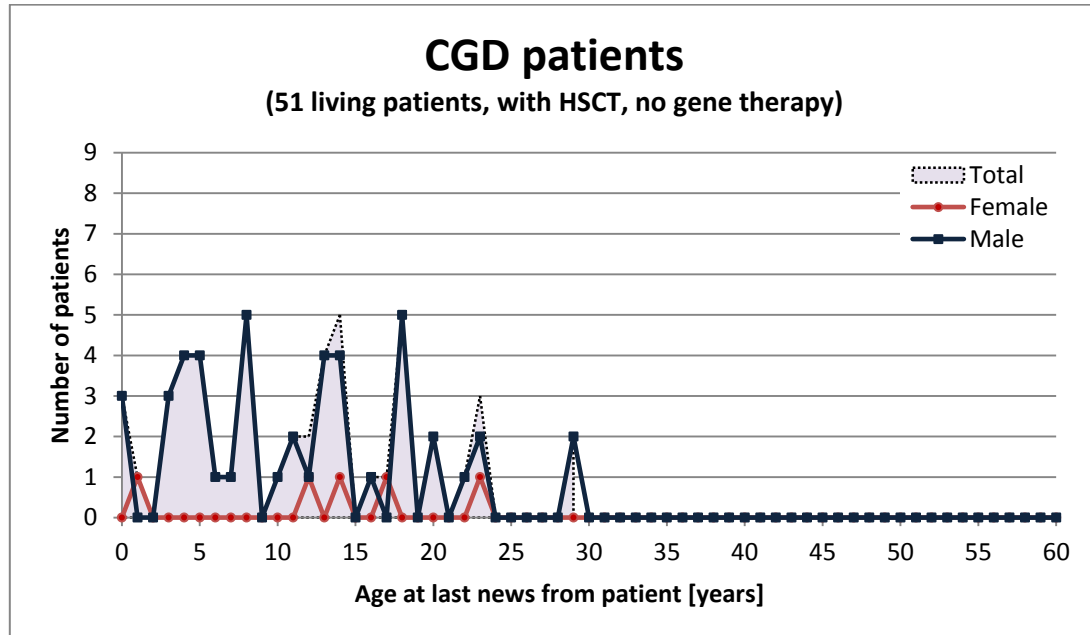

S21: Age and gender distribution of 51 living CGD patients (HSCT but no gene therapy)

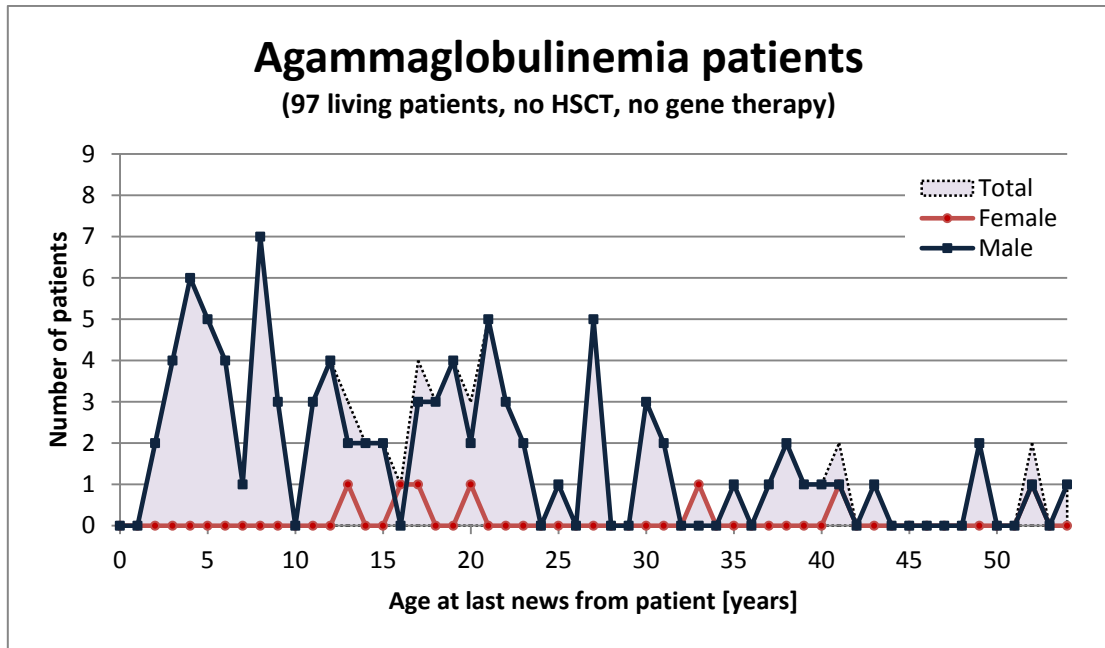

S22: Age and gender distribution of 97 living agammaglobulinemia. No patients received an HSCT or gene therapy.

Two patients with 12 and 17 years who received HSCT are not shown here.

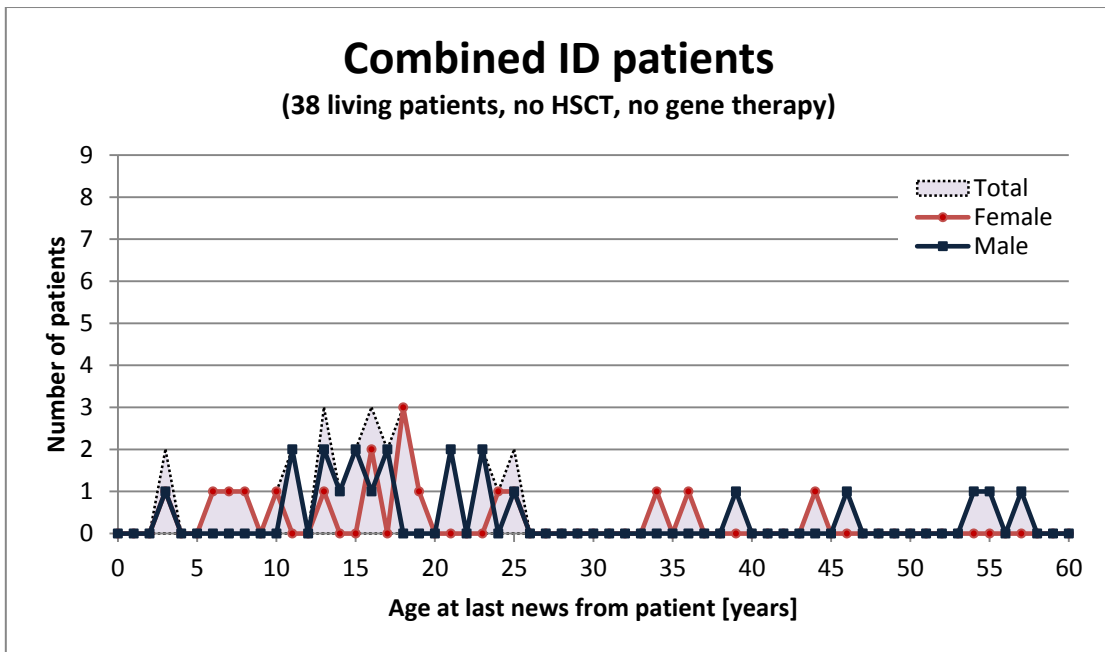

S23: Age and gender distribution of 38 living combined ID. No patients received an HSCT or gene therapy.

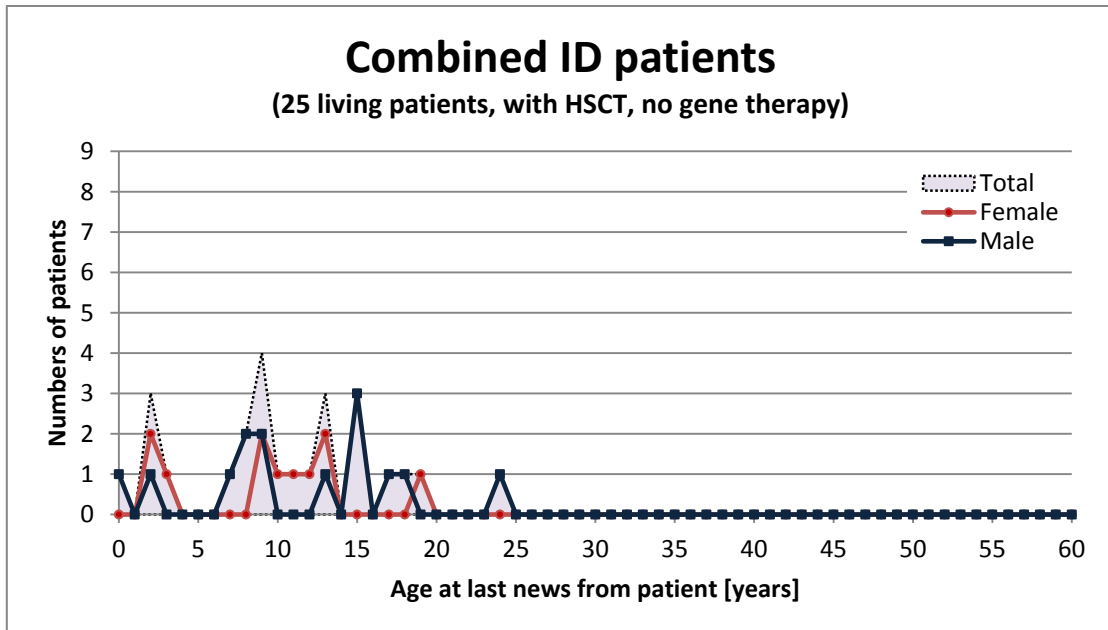

S24: Age and gender distribution of 25 living combined ID patients (HSCT but no gene therapy)

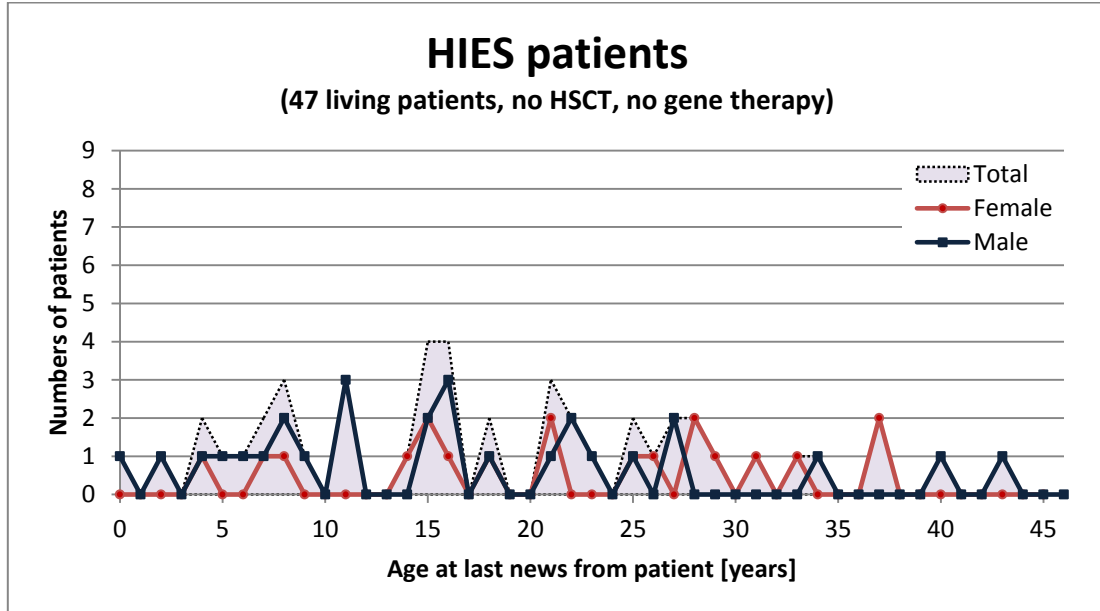

S25: Age and gender distribution of 47 living HIES patients. No patients received an HSCT or gene therapy.

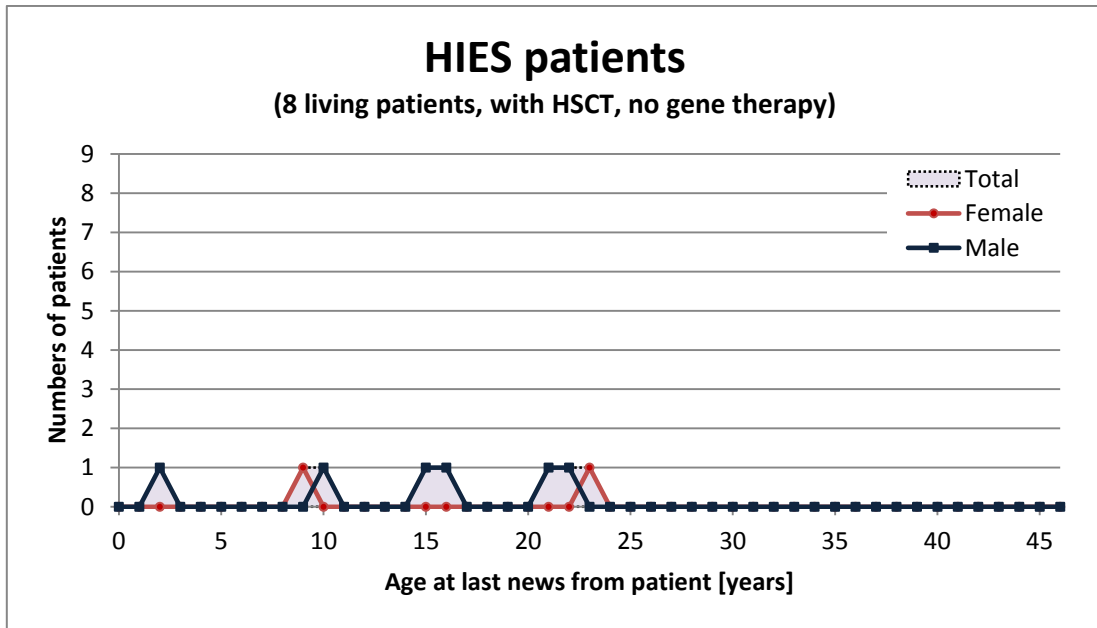

S26: Age and gender distribution of 8 living HIES patients (HSCT but no gene therapy)

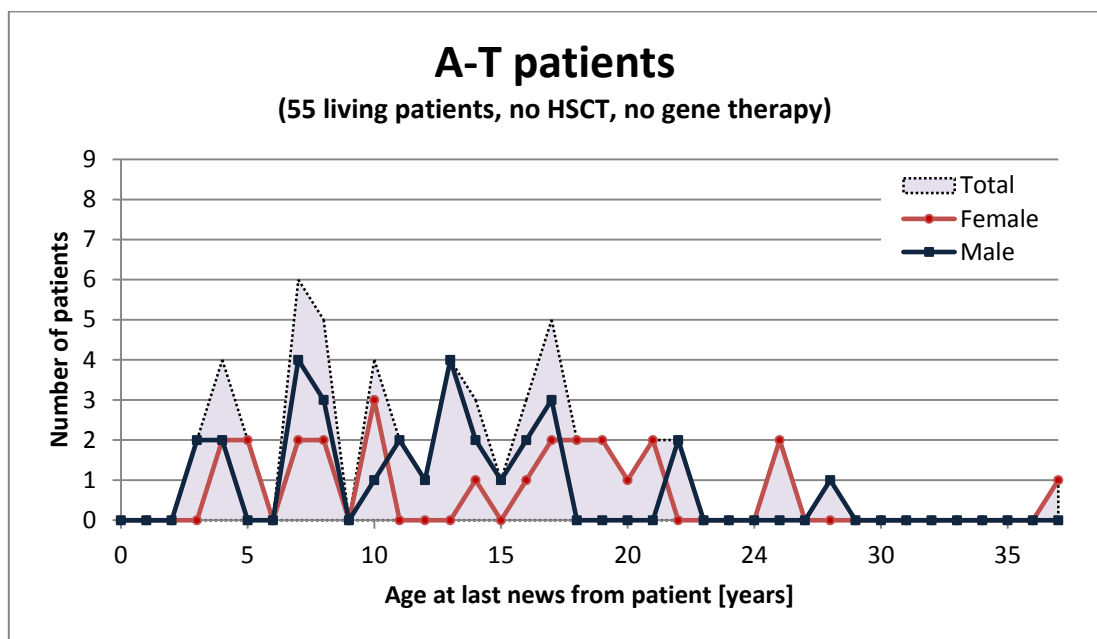

S27: Age and gender distribution of 55 living A-T patients. No patients received an HSCT or gene therapy.

Only 1 male 9 year old patient received HSCT who is not included here.

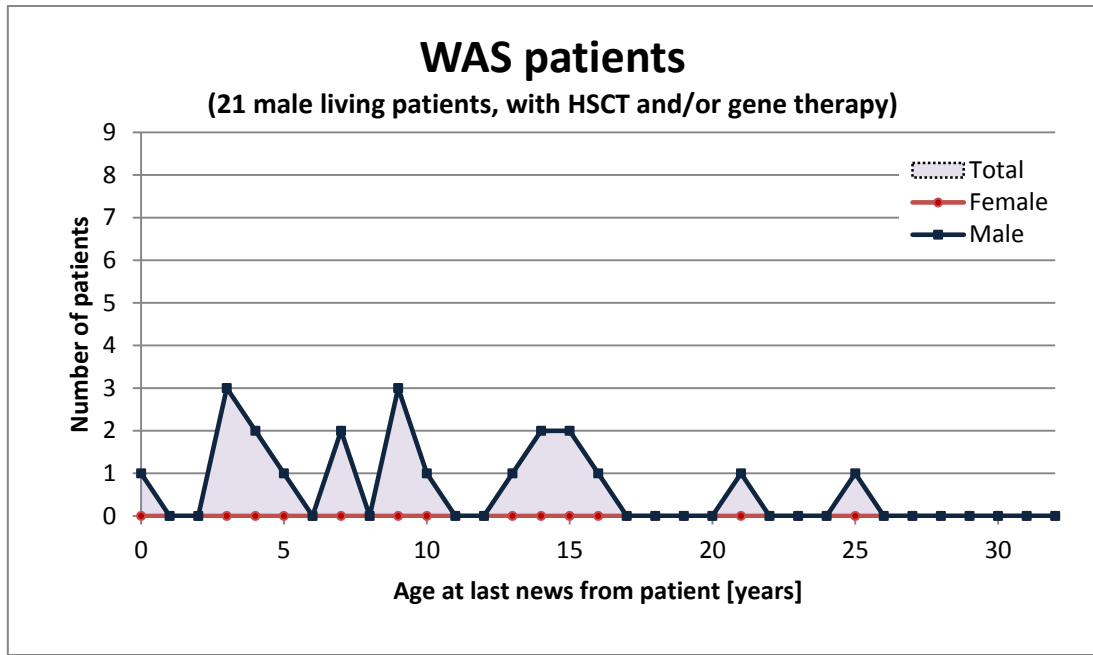

S28: Age-and gender distribution of 21 male WAS patients receiving HSCT and/or gene therapy.

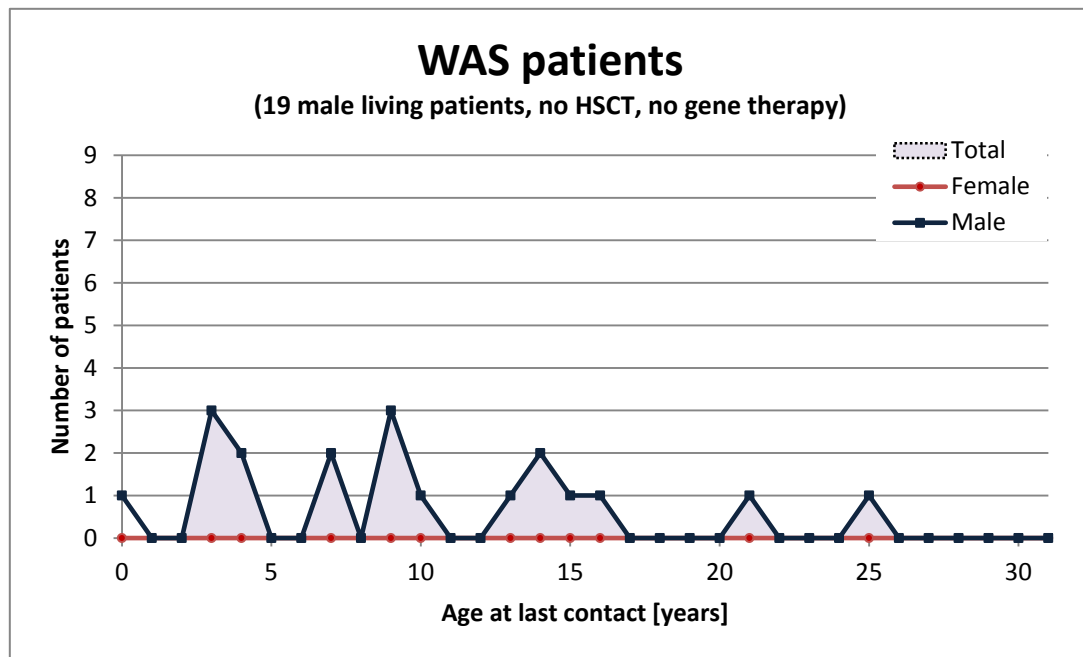

S29: Age-and gender distribution of 18 living WAS patients (HSCT but no gene therapy)



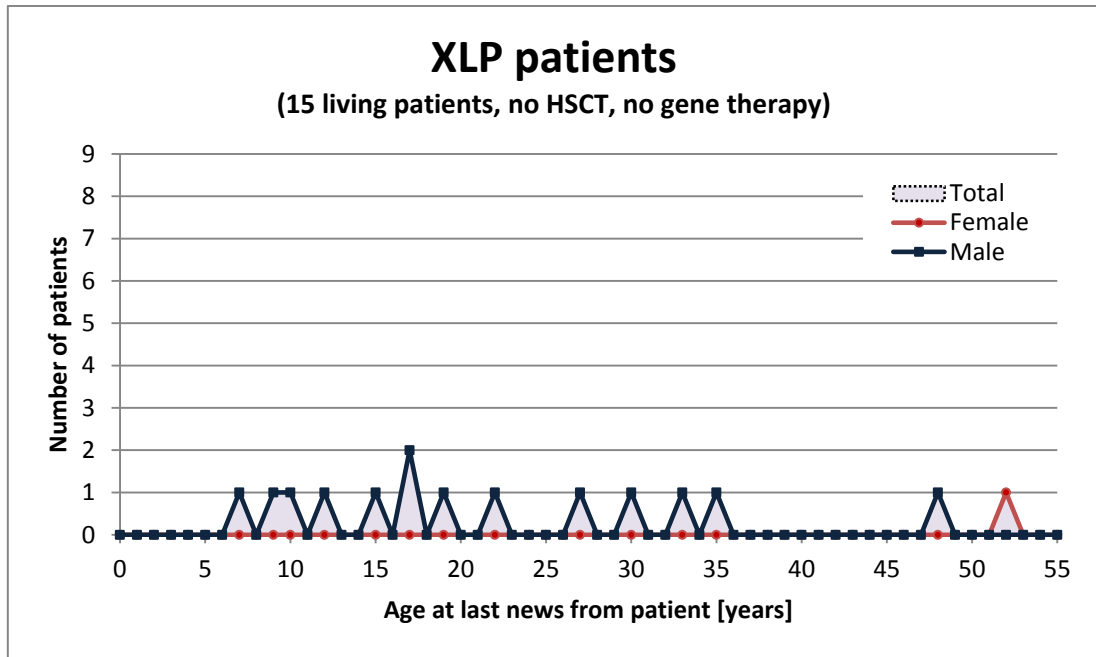

S30: Age-and gender distribution of 15 living XLP patients. No patients received an HSCT or gene therapy.

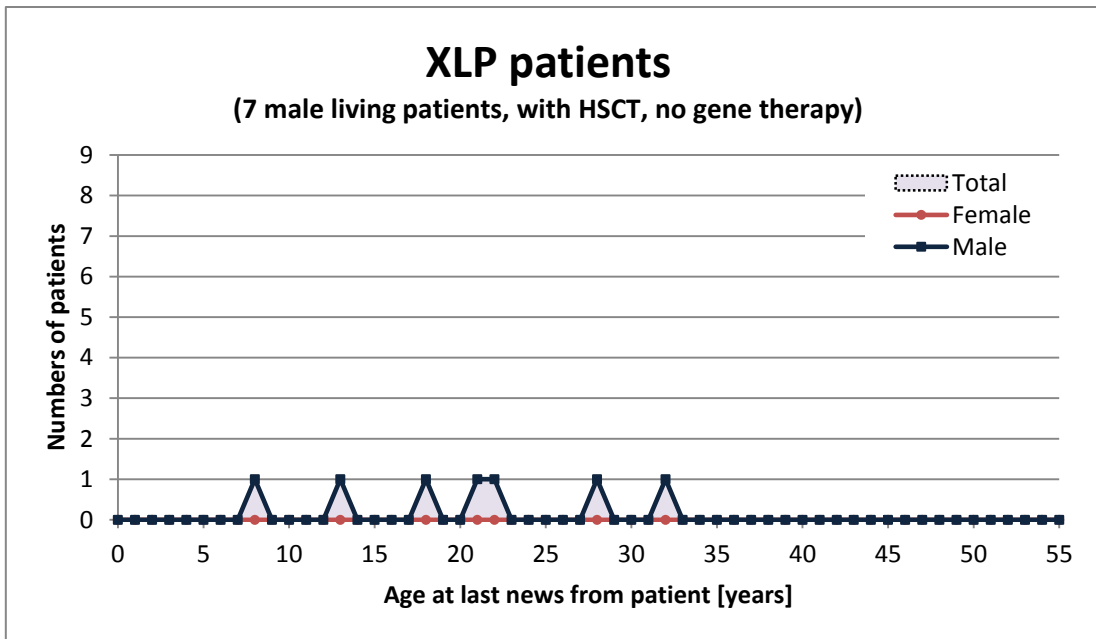

S31: Age-and gender distribution of 7 living XLP patients (HSCT but no gene therapy)

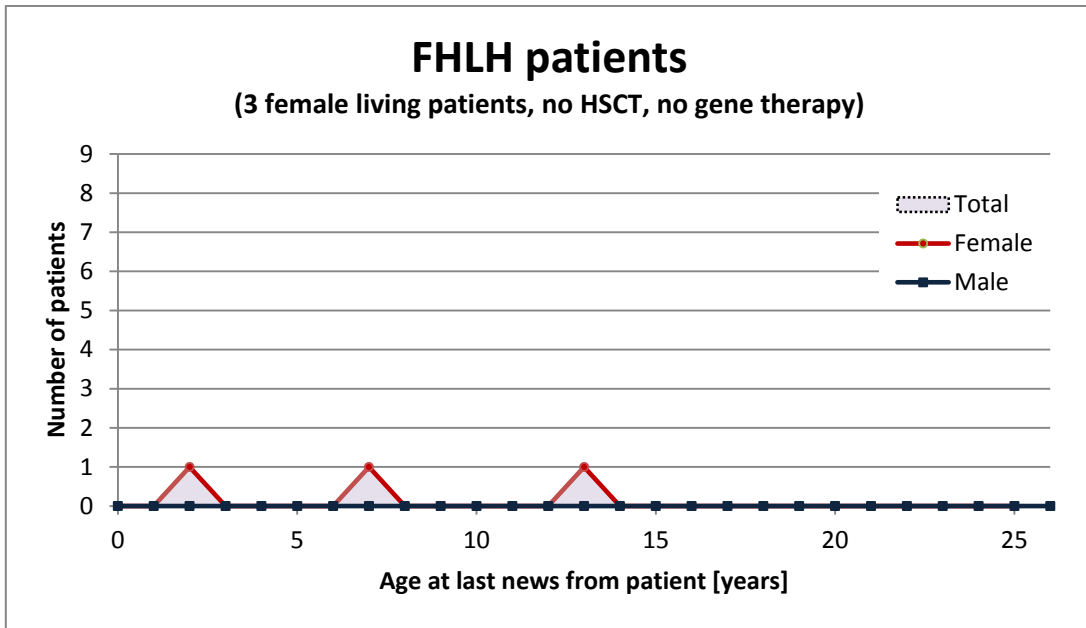

S32: Age-and gender distribution of 3 living FHLH patients. No patients received an HSCT or gene therapy.

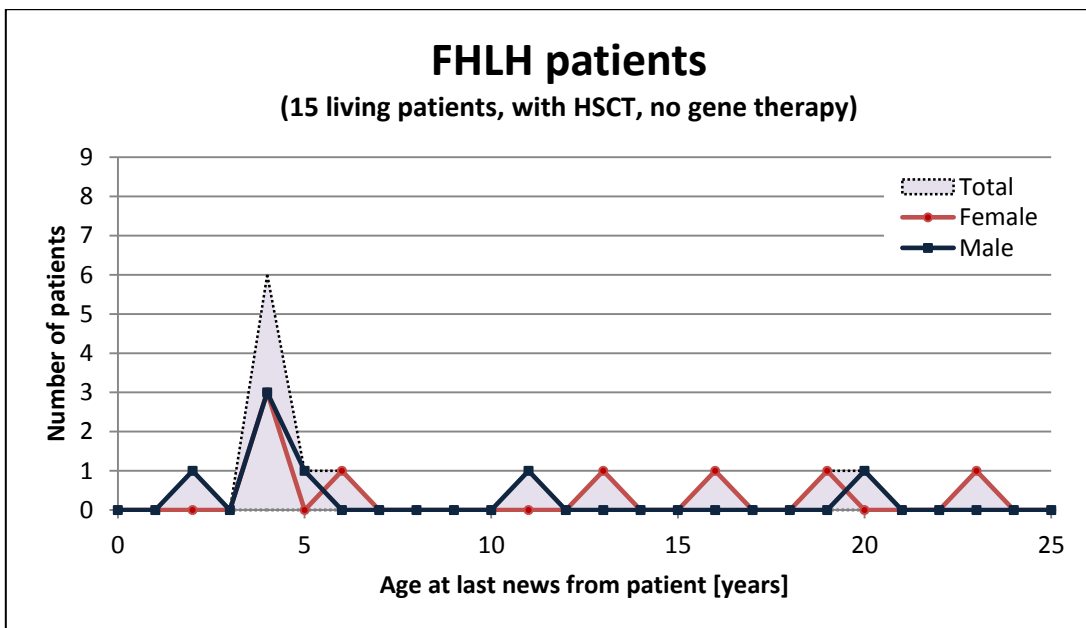

S33: Age-and gender distribution of 15 living FHLH patients (HSCT but no gene therapy)

| PID                                                   | Number of patients | No gene registered | %           | Pending   | %         | No defect found* | %         | Not genetically tested | %          | Genetic test: unknown or no information | %          | Mutation found | %         |
|-------------------------------------------------------|--------------------|--------------------|-------------|-----------|-----------|------------------|-----------|------------------------|------------|-----------------------------------------|------------|----------------|-----------|
| <b>CVID</b>                                           | 728                | 707                | 97%         | 9         | 1%        | 49               | 7%        | 505                    | 69%        | 144                                     | 20%        | 21             | 3%        |
| <b>Unclassified antibody def.</b>                     | 267                | 263                | 99%         | 7         | 3%        | 16               | 6%        | 212                    | 79%        | 28                                      | 10%        | 4              | 1%        |
| <b>Isolated IgG subclass def.</b>                     | 101                | 101                | 100%        | 0         | 0%        | 3                | 3%        | 75                     | 74%        | 23                                      | 23%        | 0              | 0%        |
| <b>Unclassified IDs</b>                               | 75                 | 74                 | 99%         | 6         | 8%        | 16               | 21%       | 24                     | 32%        | 28                                      | 37%        | 1              | 1%        |
| <b>Selective IgA deficiency</b>                       | 69                 | 69                 | 100%        | 0         | 0%        | 2                | 3%        | 52                     | 75%        | 15                                      | 22%        | 0              | 0%        |
| <b>IgA with IgG subclass def.</b>                     | 26                 | 26                 | 100%        | 0         | 0%        | 0                | 0%        | 23                     | 88%        | 3                                       | 12%        | 0              | 0%        |
| <b>Unclassified autoinflammatory</b>                  | 22                 | 22                 | 100%        | 1         | 5%        | 3                | 14%       | 17                     | 77%        | 1                                       | 5%         | 0              | 0%        |
| <b>Transient hypogammaglobulinemia of infancy</b>     | 21                 | 21                 | 100%        | 0         | 0%        | 0                | 0%        | 21                     | 100%       | 0                                       | 0%         | 0              | 0%        |
| <b>Unclassified disorders of immune dysregulation</b> | 20                 | 20                 | 100%        | 1         | 5%        | 7                | 35%       | 11                     | 55%        | 1                                       | 5%         | 0              | 0%        |
| <b>No PID Diagnosis documented yet</b>                | 19                 | 19                 | 100%        | 0         | 0%        | 0                | 0%        | 0                      | 0%         | 19                                      | 100%       | 0              | 0%        |
| <b>Specific IgG def (SPAD)</b>                        | 18                 | 18                 | 100%        | 0         | 0%        | 1                | 6%        | 6                      | 33%        | 11                                      | 61%        | 0              | 0%        |
| <b>Syndromic PID, unclassified</b>                    | 16                 | 16                 | 100%        | 2         | 13%       | 7                | 44%       | 3                      | 19%        | 4                                       | 25%        | 0              | 0%        |
| <b>Innate ID, unclassified</b>                        | 12                 | 12                 | 100%        | 4         | 33%       | 5                | 42%       | 1                      | 8%         | 2                                       | 17%        | 0              | 0%        |
| <b>Unclassified phagocytic disorders</b>              | 10                 | 10                 | 100%        | 2         | 20%       | 5                | 50%       | 1                      | 10%        | 2                                       | 20%        | 0              | 0%        |
| <b>Omenn syndrome</b>                                 | 5                  | 3                  | 60%         | 0         | 0%        | 3                | 60%       | 0                      | 0%         | 0                                       | 0%         | 2              | 40%       |
| <b>Complement ID, unclassified</b>                    | 5                  | 5                  | 100%        | 0         | 0%        | 1                | 20%       | 4                      | 80%        | 0                                       | 0%         | 0              | 0%        |
| <b>Selective IgM deficiency</b>                       | 5                  | 5                  | 100%        | 0         | 0%        | 0                | 0%        | 3                      | 60%        | 2                                       | 40%        | 0              | 0%        |
| <b>Ivemark syndrome</b>                               | 4                  | 4                  | 100%        | 0         | 0%        | 0                | 0%        | 2                      | 50%        | 2                                       | 50%        | 0              | 0%        |
| <b>Isolated congenital asplenia</b>                   | 2                  | 2                  | 100%        | 0         | 0%        | 0                | 0%        | 2                      | 100%       | 0                                       | 0%         | 0              | 0%        |
| <b>Thymoma with immunodef.</b>                        | 2                  | 2                  | 100%        | 0         | 0%        | 0                | 0%        | 2                      | 100%       | 0                                       | 0%         | 0              | 0%        |
| <b>Acquired angioedema</b>                            | 1                  | 1                  | 100%        | 0         | 0%        | 0                | 0%        | 1                      | 100%       | 0                                       | 0%         | 0              | 0%        |
| <b>Total</b>                                          | <b>1,428</b>       | <b>1,400</b>       | <b>100%</b> | <b>32</b> | <b>2%</b> | <b>118</b>       | <b>8%</b> | <b>965</b>             | <b>68%</b> | <b>285</b>                              | <b>20%</b> | <b>28</b>      | <b>2%</b> |

\*= Patient has been genetically tested but no defect has been found.

S34: PIDs with nearly no genetic information

| 12 PIDs                                 | Number of patients | No gene registered | %          | Pending   | %         | No defect found* | %         | Not genetically tested | %          | Genetic test: unknown or no information | %          | Mutation found | %          |
|-----------------------------------------|--------------------|--------------------|------------|-----------|-----------|------------------|-----------|------------------------|------------|-----------------------------------------|------------|----------------|------------|
| <b>CVID</b>                             | 728                | 707                | 97%        | 9         | 1%        | 49               | 7%        | 505                    | 69%        | 144                                     | 20%        | 21             | 3%         |
| <b>Unclassified antibody deficiency</b> | 267                | 263                | 99%        | 7         | 3%        | 16               | 6%        | 212                    | 79%        | 28                                      | 10%        | 4              | 1%         |
| <b>CGD</b>                              | 129                | 17                 | 13%        | 4         | 3%        | 1                | 1%        | 5                      | 4%         | 7                                       | 5%         | 112            | 87%        |
| <b>Agammaglobulinemia</b>               | 112                | 16                 | 14%        | 0         | 0%        | 9                | 8%        | 3                      | 3%         | 4                                       | 4%         | 96             | 86%        |
| <b>Isolated IgG subclass deficiency</b> | 101                | 101                | 100%       | 0         | 0%        | 3                | 3%        | 75                     | 74%        | 23                                      | 23%        | 0              | 0%         |
| <b>SCID</b>                             | 83                 | 19                 | 24%        | 3         | 4%        | 6                | 7%        | 2                      | 2%         | 8                                       | 10%        | 64             | 76%        |
| <b>Unclassified IDs</b>                 | 76                 | 75                 | 99%        | 6         | 8%        | 16               | 21%       | 24                     | 32%        | 29                                      | 38%        | 1              | 1%         |
| <b>Combined ID</b>                      | 74                 | 41                 | 55%        | 7         | 9%        | 17               | 23%       | 13                     | 18%        | 4                                       | 5%         | 33             | 45%        |
| <b>Selective IgA deficiency</b>         | 69                 | 69                 | 100%       | 0         | 0%        | 2                | 3%        | 52                     | 75%        | 15                                      | 22%        | 0              | 0%         |
| <b>A-T</b>                              | 66                 | 3                  | 5%         | 0         | 0%        | 0                | 0%        | 1                      | 2%         | 2                                       | 3%         | 63             | 95%        |
| <b>DGS</b>                              | 65                 | 1                  | 2%         | 0         | 0%        | 0                | 0%        | 0                      | 0%         | 1                                       | 2%         | 64             | 98%        |
| <b>HIES</b>                             | 55                 | 9                  | 16%        | 1         | 2%        | 6                | 11%       | 1                      | 2%         | 1                                       | 2%         | 46             | 84%        |
| <b>Total</b>                            | <b>1,825</b>       | <b>1,321</b>       | <b>72%</b> | <b>37</b> | <b>2%</b> | <b>125</b>       | <b>7%</b> | <b>893</b>             | <b>49%</b> | <b>266</b>                              | <b>15%</b> | <b>504</b>     | <b>28%</b> |

\*= Patient has been genetically tested but no defect has been found.

S35: 12 PIDs: genetic information

| PID/Gene                  | Female [n] | %   | Male [n] | %   | Total [n] |
|---------------------------|------------|-----|----------|-----|-----------|
| <b>HIES: <i>STAT3</i></b> | 13         | 36% | 23       | 64% | <b>36</b> |
| <b>FMF: <i>MEFV</i></b>   | 9          | 38% | 15       | 63% | <b>24</b> |
| <b>A-T: <i>ATM</i></b>    | 26         | 41% | 37       | 59% | <b>63</b> |
| <b>HAE: C1 Inhibitor</b>  | 15         | 75% | 5        | 25% | <b>20</b> |

S36: Mainly male and female patients in PID with non-X-linked gene defect, with a diagnosed gene defect

| Main category                           | Number of patients | Consanguinity |     | Familial case |     | Relative to index patient |     |
|-----------------------------------------|--------------------|---------------|-----|---------------|-----|---------------------------|-----|
| <b>Autoinflammatory disorders</b>       | 84                 | 7             | 8%  | 26            | 31% | 6                         | 7%  |
| <b>Combined immunodeficiencies</b>      | 178                | 44            | 25% | 46            | 26% | 9                         | 5%  |
| <b>Complement deficiencies</b>          | 44                 | 2             | 5%  | 25            | 57% | 9                         | 20% |
| <b>Defects in innate immunity</b>       | 45                 | 7             | 16% | 18            | 40% | 5                         | 11% |
| <b>Diseases of immune dysregulation</b> | 136                | 15            | 11% | 56            | 41% | 24                        | 18% |
| <b>No PID entered</b>                   | 19                 |               | 0%  | 4             | 21% | 1                         | 5%  |
| <b>Other well defined PIDs</b>          | 283                | 38            | 13% | 61            | 22% | 23                        | 8%  |
| <b>Phagocytic disorders</b>             | 199                | 26            | 13% | 55            | 28% | 16                        | 8%  |
| <b>Predominantly antibody disorders</b> | 1,390              | 40            | 3%  | 218           | 16% | 62                        | 4%  |
| <b>Unclassified immunodeficiencies</b>  | 75                 | 7             | 9%  | 12            | 16% | 5                         | 7%  |
| <b>Total</b>                            | <b>2,453</b>       | <b>186</b>    |     | <b>521</b>    |     | <b>160</b>                |     |

S37: Consanguinity and family case in main categories

| Main category                    | Subcategory                                               | Disease                                                          | Number of patients           | Male | Female | Deceased | Lost to follow-up | Mutated gene identified | Consanguinity | Familial case |     |
|----------------------------------|-----------------------------------------------------------|------------------------------------------------------------------|------------------------------|------|--------|----------|-------------------|-------------------------|---------------|---------------|-----|
| Predominantly antibody disorders |                                                           |                                                                  | 1,390                        | 53%  | 47%    | 18       | 88                | 11%                     | 3%            | 16%           |     |
|                                  | Agammaglobulinemias                                       |                                                                  | 112                          | 93%  | 7%     |          | 6                 | 86%                     | 4%            | 29%           |     |
|                                  |                                                           | Agammaglobulinemia                                               | 112                          | 93%  | 7%     |          | 6                 | 86%                     | 4%            | 29%           |     |
|                                  | Class switch recombination defects (CSR) / HIGM syndromes |                                                                  | 38                           | 76%  | 24%    |          | 1                 | 71%                     | 24%           | 24%           |     |
|                                  |                                                           | CSR defects and Hyper IgM (HIGM) syndromes                       | 38                           | 76%  | 24%    |          | 1                 | 71%                     | 24%           | 24%           |     |
|                                  | Hypogammaglobulinemias                                    |                                                                  | 970                          | 48%  | 52%    | 13       | 56                | 2%                      | 2%            | 14%           |     |
|                                  |                                                           | Common variable immunodeficiency disorders (CVID)                | 728                          | 48%  | 52%    | 12       | 30                | 3%                      | 2%            | 14%           |     |
|                                  |                                                           | Deficiency of specific IgG (Specific antibody deficiency - SPAD) | 18                           | 72%  | 28%    |          | 4                 | 0%                      | 11%           | 39%           |     |
|                                  |                                                           | IgA with IgG subclass deficiency                                 | 26                           | 27%  | 73%    |          | 1                 | 0%                      | 8%            | 12%           |     |
|                                  |                                                           | Isolated IgG subclass deficiency                                 | 101                          | 50%  | 50%    | 1        | 8                 | 0%                      | 2%            | 15%           |     |
|                                  |                                                           | Selective IgA deficiency                                         | 69                           | 42%  | 59%    |          | 11                | 0%                      | 3%            | 10%           |     |
|                                  |                                                           | Selective IgM deficiency                                         | 5                            | 80%  | 20%    |          |                   | 0%                      | 0%            | 0%            |     |
|                                  |                                                           | Thymoma with immunodeficiency                                    | 2                            | 100% | 0%     |          |                   | 0%                      | 0%            | 0%            |     |
|                                  |                                                           | Transient hypogammaglobulinemia of infancy                       | 21                           | 76%  | 23%    |          | 2                 | 0%                      | 5%            | 14%           |     |
|                                  |                                                           | Unclassified antibody deficiency                                 |                              | 270  | 50%    | 51%      | 5                 | 25                      | 3%            | 1%            | 14% |
|                                  |                                                           |                                                                  | Steinert myotonia dystrophia | 3    | 33%    | 67%      | 1                 |                         | 100%          | 0%            | 0%  |
|                                  |                                                           | Unclassified antibody deficiency                                 | 267                          | 50%  | 51%    | 4        | 25                | 1%                      | 1%            | 15%           |     |
| Other well defined PIDs          |                                                           |                                                                  | 283                          | 58%  | 41%    | 8        | 12                | 85%                     | 13%           | 22%           |     |
|                                  | Asplenia syndrome                                         |                                                                  | 6                            | 17%  | 80%    |          | 1                 | 0%                      | 0%            | 17%           |     |
|                                  |                                                           | Asplenia syndrome (Ivemark syndrome)                             | 4                            | 25%  | 67%    |          | 1                 | 0%                      | 0%            | 0%            |     |
|                                  |                                                           | Isolated congenital asplenia                                     | 2                            | 0%   | 100%   |          |                   | 0%                      | 0%            | 50%           |     |

| Main category | Subcategory               | Disease                                                                  | Number of patients | Male | Female | Deceased | Lost to follow-up | Mutated gene identified | Consanguinity | Familial case |
|---------------|---------------------------|--------------------------------------------------------------------------|--------------------|------|--------|----------|-------------------|-------------------------|---------------|---------------|
|               | Cartilage hair hypoplasia |                                                                          | 4                  | 50%  | 50%    | 1        |                   | 100%                    | 0%            | 50%           |
|               |                           | Cartilage hair hypoplasia                                                | 4                  | 50%  | 50%    | 1        |                   | 100%                    | 0%            | 50%           |
|               | DiGeorge syndrome         |                                                                          | 65                 | 48%  | 52%    |          | 4                 | 98%                     | 2%            | 2%            |
|               |                           | DiGeorge syndrome (DGS)                                                  | 65                 | 48%  | 52%    |          | 4                 | 98%                     | 2%            | 2%            |
|               | DNA-breakage disorder     |                                                                          | 80                 | 59%  | 41%    | 7        | 3                 | 95%                     | 26%           | 23%           |
|               |                           | Ataxia telangiectasia (A-T)                                              | 66                 | 58%  | 42%    | 6        | 3                 | 95%                     | 30%           | 23%           |
|               |                           | Bloom syndrome                                                           | 1                  | 0%   | 100%   |          |                   | 100%                    | 0%            | 0%            |
|               |                           | Immunodeficiency centromeric instability facial anomalies syndrome (ICF) | 2                  | 50%  | 50%    |          |                   | 50%                     | 50%           | 0%            |
|               |                           | Nijmegen breakage syndrome (NBS1)                                        | 10                 | 70%  | 30%    | 1        |                   | 100%                    | 0%            | 30%           |
|               |                           | Post-Meiotic Segregation 2 (PMS2) deficiency                             | 1                  | 100% | 0%     |          |                   | 100%                    | 0%            | 0%            |
|               | Dyskeratosis congenita    |                                                                          | 7                  | 57%  | 43%    |          | 1                 | 86%                     | 29%           | 43%           |
|               |                           | Dyskeratosis congenita                                                   | 7                  | 57%  | 43%    |          | 1                 | 86%                     | 29%           | 43%           |
|               | Fc receptor deficiencies  |                                                                          | 1                  | 100% | 0%     |          |                   | 100%                    | 0%            | 0%            |
|               |                           | Fc receptor deficiencies                                                 | 1                  | 100% | 0%     |          |                   | 100%                    | 0%            | 0%            |
|               | Hyper IgE syndromes       |                                                                          | 55                 | 55%  | 45%    |          |                   | 84%                     | 15%           | 38%           |
|               |                           | Hyper IgE syndrome (HIES)                                                | 55                 | 55%  | 45%    |          |                   | 84%                     | 15%           | 38%           |
|               | MonoMAC                   |                                                                          | 3                  | 33%  | 67%    |          |                   | 100%                    | 0%            | 33%           |
|               |                           | Monocytopenia and mycobacterial infection (MonoMAC)                      | 3                  | 33%  | 67%    |          |                   | 100%                    | 0%            | 33%           |
|               | Netherton syndrome        |                                                                          | 5                  | 20%  | 80%    |          |                   | 100%                    | 40%           | 40%           |
|               |                           | Netherton syndrome                                                       | 5                  | 20%  | 80%    |          |                   | 100%                    | 40%           | 40%           |
|               | Other syndromic PID       |                                                                          | 3                  | 33%  | 67%    |          |                   | 100%                    | 0%            | 33%           |
|               |                           | Activated PI3K-delta syndrome (APDS)                                     | 3                  | 33%  | 67%    |          |                   | 100%                    | 0%            | 33%           |
|               | Schimke disease           |                                                                          | 2                  | 50%  | 50%    |          |                   | 100%                    | 50%           | 0%            |
|               |                           | Schimke disease                                                          | 2                  | 50%  | 50%    |          |                   | 100%                    | 50%           | 0%            |

| Main category        | Subcategory                                                   | Disease                                                       | Number of patients | Male | Female | Deceased | Lost to follow-up | Mutated gene identified | Consanguinity | Familial case |
|----------------------|---------------------------------------------------------------|---------------------------------------------------------------|--------------------|------|--------|----------|-------------------|-------------------------|---------------|---------------|
|                      | Unclassified syndromic immunodeficiencies                     |                                                               | 16                 | 56%  | 44%    |          | 1                 | 0%                      | 19%           | 19%           |
|                      |                                                               | Unclassified syndromic immunodeficiencies                     | 16                 | 56%  | 44%    |          | 1                 | 0%                      | 19%           | 19%           |
|                      | Wiskott-Aldrich syndrome (WAS)                                |                                                               | 36                 | 100% | 0%     |          | 2                 | 86%                     | 0%            | 22%           |
|                      |                                                               | Wiskott-Aldrich syndrome (WAS)                                | 29                 | 100% | 0%     |          | 1                 | 83%                     | 0%            | 14%           |
|                      |                                                               | X-linked thrombocytopenia with mutations in WASP              | 7                  | 100% | 0%     |          | 1                 | 100%                    | 0%            | 57%           |
| Phagocytic disorders |                                                               |                                                               | 199                | 71%  | 28%    | 7        | 5                 | 79%                     | 13%           | 28%           |
|                      | Chronic granulomatous disease (CGD)                           |                                                               | 129                | 84%  | 16%    | 7        | 5                 | 87%                     | 12%           | 31%           |
|                      |                                                               | Chronic granulomatous disease (CGD)                           | 129                | 84%  | 16%    | 7        | 5                 | 87%                     | 12%           | 31%           |
|                      | Congenital neutropenia                                        |                                                               | 32                 | 41%  | 58%    |          |                   | 63%                     | 6%            | 22%           |
|                      |                                                               | Congenital neutropenia                                        | 32                 | 42%  | 58%    |          |                   | 63%                     | 6%            | 22%           |
|                      | Cyclic neutropenia                                            |                                                               | 4                  | 50%  | 50%    |          |                   | 100%                    | 0%            | 25%           |
|                      |                                                               | Cyclic neutropenia                                            | 4                  | 50%  | 50%    |          |                   | 100%                    | 0%            | 25%           |
|                      | Defects with susceptibility to mycobacterial infection (MSMD) |                                                               | 9                  | 44%  | 56%    |          |                   | 78%                     | 33%           | 22%           |
|                      |                                                               | Defects with susceptibility to mycobacterial infection (MSMD) | 9                  | 44%  | 56%    |          |                   | 78%                     | 33%           | 22%           |
|                      | Glycogen storage disease type 1b (GS1b)                       |                                                               | 1                  | 0%   | 100%   |          |                   | 100%                    | 0%            | 0%            |
|                      |                                                               | Glycogen storage disease type 1b (GS1b)                       | 1                  | 0%   | 100%   |          |                   | 100%                    | 0%            | 0%            |
|                      | Leukocyte adhesion deficiency (LAD)                           |                                                               | 2                  | 50%  | 50%    |          |                   | 100%                    | 50%           | 0%            |
|                      |                                                               | Leukocyte adhesion deficiency (LAD)                           | 2                  | 50%  | 50%    |          |                   | 100%                    | 50%           | 0%            |
|                      | Neutrophil glucose-6-phosphate dehydrogenase                  |                                                               | 1                  | 100% | 0%     |          |                   | 100%                    | 100%          | 0%            |
|                      |                                                               | Glucose-6-phosphate dehydrogenase deficiency (G6PD)           | 1                  | 100% | 0%     |          |                   | 100%                    | 100%          | 0%            |



| Main category               | Subcategory                                               | Disease                                                   | Number of patients | Male | Female | Deceased | Lost to follow-up | Mutated gene identified | Consanguinity | Familial case |
|-----------------------------|-----------------------------------------------------------|-----------------------------------------------------------|--------------------|------|--------|----------|-------------------|-------------------------|---------------|---------------|
|                             | Shwachman-Diamond-syndrome                                |                                                           | 11                 | 64%  | 36%    |          |                   | 100%                    | 9%            | 0%            |
|                             |                                                           | Shwachman-Diamond-syndrome                                | 11                 | 64%  | 36%    |          |                   | 100%                    | 9%            | 0%            |
|                             | Unclassified phagocytic disorders                         |                                                           | 10                 | 60%  | 40%    |          |                   | 0%                      | 30%           | 50%           |
|                             |                                                           | Unclassified phagocytic disorders                         | 10                 | 60%  | 40%    |          |                   | 0%                      | 30%           | 50%           |
| Combined immunodeficiencies |                                                           |                                                           | 177                | 56%  | 44%    | 11       | 8                 | 63%                     | 25%           | 26%           |
|                             | Atypical severe combined immunodeficiency (Atypical SCID) |                                                           | 7                  | 57%  | 43%    | 1        |                   | 100%                    | 43%           | 0%            |
|                             |                                                           | Atypical severe combined immunodeficiency (Atypical SCID) | 7                  | 57%  | 43%    | 1        |                   | 100%                    | 43%           | 0%            |
|                             | CD4-deficiency                                            |                                                           | 2                  | 0%   | 100%   |          |                   | 50%                     | 0%            | 0%            |
|                             |                                                           | Selective CD4 cell deficiency                             | 2                  | 0%   | 100%   |          |                   | 50%                     | 0%            | 0%            |
|                             | Combined immunodeficiency (CID)                           |                                                           | 74                 | 55%  | 45%    | 5        | 5                 | 45%                     | 23%           | 26%           |
|                             |                                                           | Combined immunodeficiency (CID)                           | 74                 | 55%  | 45%    | 5        | 5                 | 45%                     | 23%           | 26%           |
|                             | HLA class II deficiency                                   |                                                           | 5                  | 40%  | 60%    | 1        |                   | 80%                     | 0%            | 0%            |
|                             |                                                           | HLA class II deficiency                                   | 5                  | 40%  | 60%    | 1        |                   | 80%                     | 0%            | 0%            |
|                             | Omenn syndrome                                            |                                                           | 5                  | 40%  | 60%    | 1        |                   | 40%                     | 0%            | 40%           |
|                             |                                                           | Omenn syndrome                                            | 5                  | 40%  | 60%    | 1        |                   | 40%                     | 0%            | 40%           |
|                             | Severe combined immunodeficiency (SCID)                   |                                                           | 84                 | 61%  | 39%    | 3        | 3                 | 77%                     | 29%           | 30%           |
|                             |                                                           | Reticular Dysgenesis - AK2 (SCID)                         | 1                  | 0%   | 100%   |          |                   | 100%                    | 0%            | 0%            |
|                             |                                                           | Severe combined immunodeficiency (SCID)                   | 83                 | 61%  | 39%    | 3        | 3                 | 77%                     | 29%           | 30%           |

| Main category                    | Subcategory                                                             | Disease                                                                                          | Number of patients | Male | Female | Deceased | Lost to follow-up | Mutated gene identified | Consanguinity | Familial case |
|----------------------------------|-------------------------------------------------------------------------|--------------------------------------------------------------------------------------------------|--------------------|------|--------|----------|-------------------|-------------------------|---------------|---------------|
| Diseases of immune dysregulation |                                                                         |                                                                                                  | 136                | 66%  | 34%    | 4        | 8                 | 77%                     | 11%           | 41%           |
|                                  | Autoimmune lymphoproliferative syndrome (ALPS)                          |                                                                                                  | 39                 | 59%  | 41%    |          | 2                 | 90%                     | 5%            | 49%           |
|                                  |                                                                         | Autoimmune lymphoproliferative syndrome (ALPS)                                                   | 38                 | 61%  | 39%    |          | 2                 | 89%                     | 5%            | 50%           |
|                                  |                                                                         | Ras associated lymphoproliferative disease (RALD)                                                | 1                  | 0%   | 100%   |          |                   | 100%                    | 0%            | 0%            |
|                                  | Autoimmune polyendocrinopathy candidiasis ectodermal dystrophy (APECED) |                                                                                                  | 4                  | 0%   | 100%   |          | 1                 | 100%                    | 0%            | 0%            |
|                                  |                                                                         | APECED / APS1 with CMC - Autoimmune polyendocrinopathy candidiasis ectodermal dystrophy (APECED) | 4                  | 0%   | 100%   |          | 1                 | 100%                    | 0%            | 0%            |
|                                  | Early-onset inflammatory bowel disease                                  |                                                                                                  | 6                  | 50%  | 50%    |          |                   | 83%                     | 83%           | 50%           |
|                                  |                                                                         | Early-onset inflammatory bowel disease                                                           | 5                  | 40%  | 60%    |          |                   | 80%                     | 100%          | 60%           |
|                                  |                                                                         | Inflammatory Bowel Disease-like                                                                  | 1                  | 100% | 0%     |          |                   | 100%                    | 0%            | 0%            |
|                                  | Early-onset multi-organ autoimmune disease                              |                                                                                                  | 2                  | 0%   | 100%   |          |                   | 100%                    | 0%            | 0%            |
|                                  |                                                                         | Early-onset multi-organ autoimmune disease                                                       | 2                  | 0%   | 100%   |          |                   | 100%                    | 0%            | 0%            |
|                                  | Hemophagocytic lymphohistiocytosis (HLH)                                |                                                                                                  | 58                 | 76%  | 24%    | 3        | 5                 | 90%                     | 12%           | 50%           |
|                                  |                                                                         | CD27 deficiency                                                                                  | 1                  | 0%   | 100%   |          |                   | 100%                    | 0%            | 0%            |
|                                  |                                                                         | Chediak Higashi syndrome                                                                         | 4                  | 50%  | 50%    |          |                   | 75%                     | 0%            | 0%            |
|                                  |                                                                         | Familial hemophagocytic lymphohistiocytosis syndromes (FHLH)                                     | 20                 | 60%  | 40%    | 1        | 1                 | 80%                     | 25%           | 50%           |
|                                  |                                                                         | Griscelli syndrome, type 2                                                                       | 3                  | 67%  | 33%    |          |                   | 67%                     | 33%           | 67%           |
|                                  |                                                                         | Hermansky-Pudlak syndrome                                                                        | 1                  | 0%   | 100%   |          |                   | 100%                    | 100%          | 100%          |

| Main category              | Subcategory                                    | Disease                                                         | Number of patients | Male | Female | Deceased | Lost to follow-up | Mutated gene identified | Consanguinity | Familial case |
|----------------------------|------------------------------------------------|-----------------------------------------------------------------|--------------------|------|--------|----------|-------------------|-------------------------|---------------|---------------|
|                            |                                                | X-linked lymphoproliferative syndrome (XLP)                     | 29                 | 97%  | 3%     | 2        | 4                 | 100%                    | 0%            | 55%           |
|                            | IPEX                                           |                                                                 | 6                  | 100% | 0%     |          |                   | 100%                    | 17%           | 0%            |
|                            |                                                | FOXP3 deficiency (IPEX)                                         | 5                  | 100% | 0%     |          |                   | 100%                    | 0%            | 0%            |
|                            |                                                | Interleukin 2 receptor alpha deficiency (CD25) (IPEX phenotype) | 1                  | 100% | 0%     |          |                   | 100%                    | 100%          | 0%            |
|                            | Type 1 interferonopathies                      |                                                                 | 1                  | 0%   | 100%   |          |                   | 100%                    | 0%            | 0%            |
|                            |                                                | Type 1 interferonopathies                                       | 1                  | 0%   | 100%   |          |                   | 100%                    | 0%            | 0%            |
|                            | Unclassified disorders of immune dysregulation |                                                                 | 20                 | 70%  | 30%    | 1        |                   | 0%                      | 0%            | 25%           |
|                            | Unclassified disorders of immune dysregulation | 20                                                              | 70%                | 30%  | 1      |          | 0%                | 0%                      | 25%           |               |
| Autoinflammatory disorders |                                                |                                                                 | 84                 | 64%  | 36%    | 1        | 14                | 74%                     | 8%            | 31%           |
|                            | CINCA syndrome                                 |                                                                 | 6                  | 67%  | 33%    |          | 1                 | 100%                    | 17%           | 33%           |
|                            |                                                | CINCA syndrome                                                  | 6                  | 67%  | 33%    |          | 1                 | 100%                    | 17%           | 33%           |
|                            | Familial cold autoinflammatory syndrome        |                                                                 | 2                  | 100% | 0%     |          |                   | 100%                    | 0%            | 0%            |
|                            |                                                | Familial cold autoinflammatory syndrome                         | 2                  | 100% | 0%     |          |                   | 100%                    | 0%            | 0%            |
|                            | Familial Mediterranean fever (FMF)             |                                                                 | 24                 | 63%  | 38%    |          | 4                 | 100%                    | 21%           | 42%           |
|                            |                                                | Familial Mediterranean fever defect (FMF)                       | 24                 | 63%  | 38%    |          | 4                 | 100%                    | 21%           | 42%           |
|                            | Familial periodic fever                        |                                                                 | 23                 | 52%  | 48%    |          | 3                 | 100%                    | 4%            | 43%           |
|                            |                                                | Hyper IgD syndrome (MVK)                                        | 5                  | 40%  | 60%    |          | 2                 | 100%                    | 20%           | 20%           |
|                            |                                                | TNF-receptor associated periodic fever syndrome (TRAPS)         | 18                 | 56%  | 44%    |          | 1                 | 100%                    | 0%            | 50%           |
|                            | Muckle-Wells syndrome                          |                                                                 | 7                  | 57%  | 43%    |          |                   | 100%                    | 0%            | 29%           |
|                            |                                                | Muckle-Wells syndrome                                           | 7                  | 57%  | 43%    |          |                   | 100%                    | 0%            | 29%           |

| Main category                   | Subcategory                                                     | Disease                                                         | Number of patients | Male | Female | Deceased | Lost to follow-up | Mutated gene identified | Consanguinity | Familial case |
|---------------------------------|-----------------------------------------------------------------|-----------------------------------------------------------------|--------------------|------|--------|----------|-------------------|-------------------------|---------------|---------------|
|                                 | Unclassified autoinflammatory diseases                          |                                                                 | 22                 | 77%  | 23%    | 1        | 6                 | 0%                      | 0%            | 9%            |
|                                 |                                                                 | Unclassified autoinflammatory diseases                          | 22                 | 77%  | 23%    | 1        | 6                 | 0%                      | 0%            | 9%            |
| Unclassified immunodeficiencies |                                                                 |                                                                 | 76                 | 49%  | 51%    |          | 6                 | 1%                      | 9%            | 16%           |
|                                 | Unclassified immunodeficiencies                                 |                                                                 | 76                 | 49%  | 51%    |          | 6                 | 1%                      | 10%           | 16%           |
|                                 |                                                                 | Unclassified immunodeficiencies                                 | 76                 | 49%  | 51%    |          | 6                 | 1%                      | 10%           | 16%           |
| Defects in innate immunity      |                                                                 |                                                                 | 45                 | 56%  | 44%    |          | 4                 | 64%                     | 16%           | 40%           |
|                                 | Chronic mucocutaneous candidiasis (CMC)                         |                                                                 | 19                 | 58%  | 42%    |          | 3                 | 79%                     | 11%           | 42%           |
|                                 |                                                                 | Chronic mucocutaneous candidiasis (CMC)                         | 19                 | 58%  | 42%    |          | 3                 | 79%                     | 11%           | 42%           |
|                                 | Defects of TLR/NFkappa-B signalling                             |                                                                 | 9                  | 78%  | 22%    |          |                   | 100%                    | 33%           | 33%           |
|                                 |                                                                 | Defects of TLR/NFkappa-B signalling                             | 9                  | 78%  | 22%    |          |                   | 100%                    | 33%           | 33%           |
|                                 | Unclassified defects in innate immunity                         |                                                                 | 12                 | 42%  | 58%    |          | 1                 | 0%                      | 17%           | 33%           |
|                                 |                                                                 | Unclassified defects in innate immunity                         | 12                 | 42%  | 58%    |          | 1                 | 0%                      | 17%           | 33%           |
|                                 | Warts hypogammaglobulinemia infections and myelokathexis (WHIM) |                                                                 | 5                  | 40%  | 60%    |          |                   | 100%                    | 0%            | 60%           |
|                                 |                                                                 | Warts hypogammaglobulinemia infections and myelokathexis (WHIM) | 5                  | 40%  | 60%    |          |                   | 100%                    | 0%            | 60%           |
| Complement deficiencies         |                                                                 |                                                                 | 44                 | 45%  | 56%    | 2        | 4                 | 77%                     | 5%            | 57%           |
|                                 | Complement deficiency                                           |                                                                 | 38                 | 45%  | 57%    | 2        | 4                 | 87%                     | 5%            | 63%           |
|                                 |                                                                 | Acquired angioedema                                             | 1                  | 100% | 0%     |          |                   | 0%                      | 0%            | 100%          |
|                                 |                                                                 | Complement component 1 deficiency                               | 1                  | 0%   | 100%   | 1        |                   | 100%                    | 100%          | 0%            |
|                                 |                                                                 | Complement component 2 deficiency                               | 6                  | 50%  | 50%    |          | 1                 | 100%                    | 0%            | 0%            |

| Main category  | Subcategory                          | Disease                                        | Number of patients | Male | Female | Deceased  | Lost to follow-up | Mutated gene identified | Consanguinity | Familial case |
|----------------|--------------------------------------|------------------------------------------------|--------------------|------|--------|-----------|-------------------|-------------------------|---------------|---------------|
|                |                                      | Complement component 7 deficiency              | 1                  | 100% | 0%     |           |                   | 100%                    | 100%          | 0%            |
|                |                                      | Complement component 8 deficiency              | 3                  | 67%  | 33%    |           | 3                 | 100%                    | 0%            | 100%          |
|                |                                      | Factor I deficiency                            | 1                  | 100% | 0%     |           |                   | 100%                    | 0%            | 0%            |
|                |                                      | Hereditary Angioedema (HAE, C1inh)             | 23                 | 30%  | 73%    |           |                   | 87%                     | 0%            | 78%           |
|                |                                      | Properdin P factor complement deficiency (PFC) | 2                  | 100% | 0%     | 1         |                   | 50%                     | 0%            | 100%          |
|                | Mannose-binding lectin (MBL)         |                                                | 1                  | 0%   | 100%   |           |                   | 100%                    | 0%            | 0%            |
|                |                                      | Mannose-binding lectin deficiency (MBL)        | 1                  | 0%   | 100%   |           |                   | 100%                    | 0%            | 0%            |
|                | Unclassified complement deficiencies |                                                | 5                  | 60%  | 40%    |           |                   | 0%                      | 0%            | 20%           |
|                |                                      | Unclassified complement deficiencies           | 5                  | 60%  | 40%    |           |                   | 0%                      | 0%            | 20%           |
| No PID entered |                                      |                                                | 19                 | 68%  | 32%    |           |                   | 0%                      |               | 21%           |
|                |                                      | no PID entered                                 | 19                 | 68%  | 32%    |           |                   | 0%                      | 0%            | 21%           |
| <b>Total</b>   |                                      |                                                | <b>2,453</b>       |      |        | <b>51</b> | <b>149</b>        |                         |               |               |

### S38: Gender, deceased, lost, gene identified, consanguinity, and family case by PIDs

Distribution of patients on main categories, subcategories, diseases, number of patients, share of gender distribution, number of patients deceased or lost to follow-up, and share of patients with known genetic cause, consanguinity of parents and PID case with family members of the patient. Missing values: unknown or no information given.

| PID / presenting symptoms                      | PID patients with information | Infections | %   | Immune dysregulation | %   | Syndromal | %   | Malignancy | %     | Other symptoms | %   | No first symptoms | %   | Diagnosis by lab abnormalities | %   |
|------------------------------------------------|-------------------------------|------------|-----|----------------------|-----|-----------|-----|------------|-------|----------------|-----|-------------------|-----|--------------------------------|-----|
| CVID                                           | 626                           | 577        | 92% | 144                  | 23% | 11        | 2%  | 8          | 1%    | 31             | 5%  | 8                 | 1%  | 8                              | 1%  |
| Unclassified antibody deficiency               | 238                           | 208        | 87% | 37                   | 16% | 17        | 7%  | 1          | 0,42% | 20             | 8%  | 10                | 4%  | 8                              | 3%  |
| CGD                                            | 113                           | 87         | 77% | 36                   | 32% |           | 0%  |            | 0%    | 7              | 6%  | 6                 | 5%  | 1                              | 1%  |
| Agammaglobulinemia                             | 99                            | 91         | 92% | 6                    | 6%  | 1         | 1%  |            | 0%    | 3              | 3%  | 5                 | 5%  | 4                              | 4%  |
| Isolated IgG subclass deficiency               | 89                            | 83         | 93% | 9                    | 10% | 3         | 3%  | 1          | 1%    | 7              | 8%  | 2                 | 2%  | 2                              | 2%  |
| SCID                                           | 77                            | 59         | 77% | 16                   | 21% | 3         | 4%  |            | 0%    | 8              | 10% | 10                | 13% | 2                              | 3%  |
| Combined ID                                    | 71                            | 45         | 63% | 37                   | 52% | 5         | 7%  |            | 0%    | 10             | 14% | 3                 | 4%  | 2                              | 3%  |
| A-T                                            | 59                            | 15         | 25% | 4                    | 7%  | 20        | 34% |            | 0%    | 39             | 66% | 1                 | 2%  | 1                              | 2%  |
| DGS                                            | 56                            | 16         | 29% | 4                    | 7%  | 47        | 84% |            | 0%    | 6              | 11% | 3                 | 5%  | 1                              | 2%  |
| Selective IgA deficiency                       | 56                            | 43         | 77% | 12                   | 21% | 1         | 2%  |            | 0%    | 5              | 9%  | 3                 | 5%  | 3                              | 5%  |
| HIES                                           | 53                            | 42         | 79% | 15                   | 28% | 13        | 25% |            | 0%    | 6              | 11% |                   | 0%  |                                |     |
| Unclassified IDs                               | 50                            | 38         | 76% | 16                   | 32% | 3         | 6%  | 2          | 4%    | 5              | 10% | 1                 | 2%  | 1                              | 2%  |
| ALPS                                           | 34                            | 6          | 18% | 30                   | 88% |           | 0%  |            | 0%    | 3              | 9%  | 2                 | 6%  | 1                              | 3%  |
| CSR/HIGM (Hyper-IgM)                           | 33                            | 32         | 97% | 9                    | 27% | 1         | 3%  |            | 0%    | 1              | 3%  |                   | 0%  |                                |     |
| Congenital neutropenia                         | 29                            | 22         | 76% | 5                    | 17% | 3         | 10% |            | 0%    | 6              | 21% | 3                 | 10% | 3                              | 10% |
| XLP                                            | 27                            | 13         | 48% | 14                   | 52% |           | 0%  | 3          | 11%   | 3              | 11% | 3                 | 11% |                                |     |
| IgA with IgG subclass deficiency               | 26                            | 25         | 96% | 6                    | 23% | 2         | 8%  |            | 0%    | 3              | 12% |                   | 0%  |                                |     |
| FMF                                            | 24                            | 4          | 17% | 16                   | 67% |           | 0%  |            | 0%    | 7              | 29% | 1                 | 4%  |                                |     |
| WAS                                            | 24                            | 10         | 42% | 10                   | 42% | 4         | 17% |            | 0%    | 9              | 38% | 1                 | 4%  |                                |     |
| HAE (C1Inh)                                    | 21                            |            | 0%  |                      | 0%  |           | 0%  |            | 0%    | 16             | 76% | 5                 | 24% | 4                              | 19% |
| Transient hypogammaglobulinemia of infancy     | 21                            | 14         | 67% | 1                    | 5%  |           | 0%  |            | 0%    | 1              | 5%  | 5                 | 24% | 5                              | 24% |
| FHLH                                           | 20                            | 6          | 30% | 12                   | 60% | 2         | 10% |            | 0%    | 2              | 10% | 2                 | 10% |                                |     |
| Unclassified disorders of immune dysregulation | 20                            | 7          | 35% | 16                   | 80% | 1         | 5%  |            | 0%    |                | 0%  | 3                 | 15% | 2                              | 10% |
| Unclassified autoinflammatory                  | 20                            | 1          | 5%  | 12                   | 60% |           | 0%  |            | 0%    | 8              | 40% |                   | 0%  |                                |     |

| PID / presenting symptoms         | PID patients with information | Infections | %    | Immune dysregulation | %    | Syndromal | %   | Malignancy | %   | Other symptoms | %   | No first symptoms | %   | Diagnosis by lab abnormalities | %   |
|-----------------------------------|-------------------------------|------------|------|----------------------|------|-----------|-----|------------|-----|----------------|-----|-------------------|-----|--------------------------------|-----|
| TRAPS                             | 17                            | 2          | 12%  | 7                    | 41%  |           | 0%  |            | 0%  | 6              | 35% | 3                 | 18% | 2                              | 12% |
| CMC                               | 16                            | 15         | 94%  | 1                    | 6%   | 2         | 13% |            | 0%  | 2              | 13% |                   | 0%  |                                |     |
| Syndromic PID, unclassified       | 15                            | 11         | 73%  | 4                    | 27%  | 10        | 67% |            | 0%  | 2              | 13% |                   | 0%  |                                |     |
| Innate ID, unclassified           | 12                            | 11         | 92%  | 2                    | 17%  | 3         | 25% |            | 0%  | 1              | 8%  |                   | 0%  |                                |     |
| Shwachman-Diamond-syndrome        | 11                            | 8          | 73%  | 6                    | 55%  | 6         | 55% |            | 0%  | 2              | 18% |                   | 0%  |                                |     |
| Specific IgG deficiency (SPAD)    | 11                            | 11         | 100% | 1                    | 9%   |           | 0%  |            | 0%  | 3              | 27% |                   | 0%  |                                |     |
| NBS1                              | 9                             | 5          | 56%  |                      | 0%   | 8         | 89% |            | 0%  | 1              | 11% |                   | 0%  |                                |     |
| Unclassified phagocytic disorders | 9                             | 4          | 44%  | 3                    | 33%  | 2         | 22% |            | 0%  | 1              | 11% | 1                 | 11% | 1                              | 11% |
| TLR/NFkappa-B                     | 8                             | 6          | 75%  | 1                    | 13%  | 1         | 13% |            | 0%  |                | 0%  | 1                 | 13% |                                |     |
| Atypical SCID                     | 7                             | 5          | 71%  | 1                    | 14%  | 1         | 14% |            | 0%  | 1              | 14% |                   | 0%  |                                |     |
| MSMD                              | 7                             | 6          | 86%  | 3                    | 43%  |           | 0%  |            | 0%  | 1              | 14% | 1                 | 14% |                                |     |
| Muckle-Wells syndrome             | 7                             | 1          | 14%  | 5                    | 71%  | 1         | 14% |            | 0%  | 1              | 14% |                   | 0%  |                                |     |
| No PID entered                    | 7                             | 5          | 71%  | 2                    | 29%  |           | 0%  |            | 0%  |                | 0%  |                   | 0%  |                                |     |
| XLT (WASP)                        | 7                             | 1          | 14%  | 1                    | 14%  | 1         | 14% |            | 0%  | 5              | 71% | 1                 | 14% | 1                              | 14% |
| CINCA syndrome                    | 6                             |            | 0%   | 2                    | 33%  | 2         | 33% |            | 0%  | 4              | 67% |                   | 0%  |                                |     |
| Dyskeratosis congenita            | 6                             | 3          | 50%  | 2                    | 33%  | 2         | 33% | 1          | 17% |                | 0%  | 1                 | 17% |                                |     |
| C2 deficiency                     | 5                             | 4          | 80%  | 1                    | 20%  |           | 0%  |            | 0%  |                | 0%  |                   | 0%  |                                |     |
| Complement ID, unclassified       | 5                             | 5          | 100% | 1                    | 20%  |           | 0%  |            | 0%  |                | 0%  |                   | 0%  |                                |     |
| Early onset of IBD                | 5                             | 2          | 40%  | 4                    | 80%  |           | 0%  |            | 0%  |                | 0%  |                   | 0%  |                                |     |
| HLA class II deficiency           | 5                             | 4          | 80%  | 1                    | 20%  |           | 0%  |            | 0%  |                | 0%  | 1                 | 20% |                                |     |
| Hyper IgD syndrome (MVK)          | 5                             | 1          | 20%  | 5                    | 100% |           | 0%  |            | 0%  |                | 0%  |                   | 0%  |                                |     |
| IPEX                              | 5                             | 1          | 20%  | 4                    | 80%  |           | 0%  |            | 0%  |                | 0%  |                   | 0%  |                                |     |
| Netherton syndrome                | 5                             |            | 0%   | 1                    | 20%  | 3         | 60% |            | 0%  | 2              | 40% |                   | 0%  |                                |     |
| Omenn syndrome                    | 5                             | 2          | 40%  | 2                    | 40%  |           | 0%  |            | 0%  | 1              | 20% |                   | 0%  |                                |     |
| WHIM                              | 5                             | 4          | 80%  | 3                    | 60%  |           | 0%  |            | 0%  |                | 0%  | 1                 | 20% |                                |     |

| PID / presenting symptoms                  | PID patients with information | Infections | %    | Immune dysregulation | %    | Syndromal | %    | Malignancy | %    | Other symptoms | %    | No first symptoms | %    | Diagnosis by lab abnormalities | %    |
|--------------------------------------------|-------------------------------|------------|------|----------------------|------|-----------|------|------------|------|----------------|------|-------------------|------|--------------------------------|------|
| Cartilage hair hypoplasia                  | 4                             | 3          | 75%  |                      | 0%   | 4         | 100% |            | 0%   |                | 0%   |                   | 0%   |                                |      |
| Chediak Higashi syndrome                   | 4                             | 3          | 75%  | 1                    | 25%  | 1         | 25%  |            | 0%   | 1              | 25%  |                   | 0%   |                                |      |
| Cyclic neutropenia                         | 4                             | 3          | 75%  | 1                    | 25%  |           | 0%   |            | 0%   |                | 0%   |                   | 0%   |                                |      |
| IgM deficiency                             | 4                             | 4          | 100% |                      | 0%   |           | 0%   |            | 0%   |                | 0%   |                   | 0%   |                                |      |
| Ivemark syndrome                           | 4                             | 1          | 25%  |                      | 0%   | 2         | 50%  |            | 0%   | 1              | 25%  |                   | 0%   |                                |      |
| APDS                                       | 3                             | 3          | 100% | 1                    | 33%  |           | 0%   | 1          | 33%  |                | 0%   |                   | 0%   |                                |      |
| APECED                                     | 3                             |            | 0%   | 1                    | 33%  |           | 0%   |            | 0%   | 2              | 67%  |                   | 0%   |                                |      |
| C8 deficiency                              | 3                             | 1          | 33%  |                      | 0%   |           | 0%   |            | 0%   |                | 0%   | 2                 | 67%  |                                |      |
| MonoMAC                                    | 3                             | 1          | 33%  | 1                    | 33%  |           | 0%   |            | 0%   | 1              | 33%  |                   | 0%   |                                |      |
| Steinert myotonic dystrophia               | 3                             | 1          | 33%  | 1                    | 33%  | 1         | 33%  |            | 0%   |                | 0%   |                   | 0%   |                                |      |
| Early-onset multi-organ autoimmune disease | 2                             | 1          | 50%  | 2                    | 100% |           | 0%   |            | 0%   |                | 0%   |                   | 0%   |                                |      |
| FCAS                                       | 2                             |            | 0%   |                      | 0%   |           | 0%   |            | 0%   | 2              | 100% |                   | 0%   |                                |      |
| Griscelli, type 2                          | 2                             |            | 0%   | 1                    | 50%  |           | 0%   |            | 0%   |                | 0%   | 1                 | 50%  |                                |      |
| ICF                                        | 2                             | 2          | 100% | 1                    | 50%  | 1         | 50%  |            | 0%   |                | 0%   |                   | 0%   |                                |      |
| Isolated congenital asplenia               | 2                             |            | 0%   |                      | 0%   |           | 0%   |            | 0%   |                | 0%   | 2                 | 100% | 2                              | 100% |
| LAD                                        | 2                             | 2          | 100% |                      | 0%   |           | 0%   |            | 0%   |                | 0%   |                   | 0%   |                                |      |
| PFC                                        | 2                             | 2          | 100% |                      | 0%   |           | 0%   |            | 0%   |                | 0%   |                   | 0%   |                                |      |
| Thymoma with immunodeficiency              | 2                             | 1          | 50%  |                      | 0%   |           | 0%   | 2          | 100% |                | 0%   |                   | 0%   |                                |      |
| Acquired angioedema                        | 1                             |            | 0%   | 1                    | 100% |           | 0%   |            | 0%   |                | 0%   |                   | 0%   |                                |      |
| Bloom syndrome                             | 1                             |            | 0%   |                      | 0%   | 1         | 100% |            | 0%   |                | 0%   |                   | 0%   |                                |      |
| C1 deficiency                              | 1                             | 1          | 100% | 1                    | 100% |           | 0%   |            | 0%   |                | 0%   |                   | 0%   |                                |      |
| C7 deficiency                              | 1                             | 1          | 100% |                      | 0%   |           | 0%   |            | 0%   |                | 0%   |                   | 0%   |                                |      |
| CD25 deficiency                            | 1                             | 1          | 100% |                      | 0%   | 1         | 100% |            | 0%   |                | 0%   |                   | 0%   |                                |      |
| CD27 deficiency                            | 1                             | 1          | 100% |                      | 0%   |           | 0%   |            | 0%   |                | 0%   |                   | 0%   |                                |      |
| CD4 deficiency                             | 1                             |            | 0%   | 1                    | 100% |           | 0%   |            | 0%   |                | 0%   |                   | 0%   |                                |      |



| PID / presenting symptoms         | PID patients with information | Infections   | %          | Immune dysregulation | %          | Syndromal  | %         | Malignancy | %            | Other symptoms | %          | No first symptoms | %         | Diagnosis by lab abnormalities | %         |
|-----------------------------------|-------------------------------|--------------|------------|----------------------|------------|------------|-----------|------------|--------------|----------------|------------|-------------------|-----------|--------------------------------|-----------|
| G6PD                              | 1                             | 1            | 100%       |                      | 0%         |            | 0%        |            | 0%           |                | 0%         |                   | 0%        |                                |           |
| GSD 1b                            | 1                             |              | 0%         |                      | 0%         |            | 0%        |            | 0%           |                | 0%         | 1                 | 100%      | 1                              | 100%      |
| Hermansky-Pudlak syndrome         | 1                             |              | 0%         | 1                    | 100%       |            | 0%        |            | 0%           |                | 0%         |                   | 0%        |                                |           |
| IBD-like                          | 1                             |              | 0%         | 1                    | 100%       |            | 0%        |            | 0%           | 1              | 100%       |                   | 0%        |                                |           |
| MBL                               | 1                             | 1            | 100%       |                      | 0%         |            | 0%        |            | 0%           |                | 0%         |                   | 0%        |                                |           |
| PMS2 deficiency                   | 1                             | 1            | 100%       |                      | 0%         |            | 0%        |            | 0%           |                | 0%         |                   | 0%        |                                |           |
| RALD                              | 1                             | 1            | 100%       | 1                    | 100%       |            | 0%        |            | 0%           |                | 0%         |                   | 0%        |                                |           |
| Reticular Dysgenesis - AK2 (SCID) | 1                             |              | 0%         |                      | 0%         |            | 0%        |            | 0%           | 1              | 100%       |                   | 0%        |                                |           |
| Type 1 interferonopathies         | 1                             | 1            | 100%       | 1                    | 100%       |            | 0%        |            | 0%           |                | 0%         |                   | 0%        |                                |           |
| <b>Total</b>                      | <b>2,153</b>                  | <b>1,598</b> | <b>74%</b> | <b>547</b>           | <b>25%</b> | <b>190</b> | <b>9%</b> | <b>19</b>  | <b>1%</b>    | <b>248</b>     | <b>12%</b> | <b>93</b>         | <b>4%</b> | <b>55</b>                      | <b>3%</b> |
| <b>Female</b>                     | <b>927</b>                    | <b>690</b>   | <b>74%</b> | <b>248</b>           | <b>27%</b> | <b>87</b>  | <b>9%</b> | <b>5</b>   | <b>0,54%</b> | <b>97</b>      | <b>10%</b> | <b>41</b>         | <b>4%</b> | <b>26</b>                      | <b>3%</b> |
| <b>Male</b>                       | <b>1,226</b>                  | <b>908</b>   | <b>74%</b> | <b>299</b>           | <b>24%</b> | <b>103</b> | <b>8%</b> | <b>14</b>  | <b>1,14%</b> | <b>151</b>     | <b>12%</b> | <b>52</b>         | <b>4%</b> | <b>29</b>                      | <b>2%</b> |

S39: Presenting symptoms

pink: 50% and more, less than 15 patients, dark pink: 50% and more, more than 15 patients

| Top 12 PIDs / Age                | 0          | 01 to 5    | 06 to 10   | 11 to 15   | 16 to 20   | 21 to 25  | 26 to 30  | 31 to 35  | 36 to 40  | 41 to 45  | 46 to 50  | 51 to 100 | Total        |
|----------------------------------|------------|------------|------------|------------|------------|-----------|-----------|-----------|-----------|-----------|-----------|-----------|--------------|
| CVID                             | 55         | 132        | 73         | 62         | 74         | 36        | 45        | 40        | 39        | 29        | 16        | 33        | 634          |
| Unclassified antibody deficiency | 36         | 74         | 22         | 16         | 10         | 8         | 13        | 9         | 8         | 8         | 9         | 9         | 222          |
| Isolated IgG subclass deficiency | 21         | 22         | 3          | 8          | 3          | 3         | 2         | 7         | 5         | 3         | 1         | 3         | 81           |
| Unclassified IDs                 | 12         | 31         | 6          | 4          | 2          | 1         | 2         | 2         |           | 1         | 1         | 2         | 64           |
| Selective IgA deficiency         | 9          | 28         | 4          | 4          | 3          | 2         | 2         | 2         |           | 1         | 1         | 2         | 58           |
| CGD                              | 45         | 52         | 10         | 3          | 4          |           |           |           |           |           |           |           | 114          |
| Combined ID                      | 30         | 20         | 6          | 8          | 2          |           |           |           |           |           | 2         |           | 68           |
| Agammaglobulinemia               | 48         | 46         | 4          |            | 1          |           | 3         |           |           |           |           |           | 102          |
| HIES                             | 30         | 17         | 3          |            | 1          |           | 1         |           |           |           |           |           | 52           |
| SCID                             | 60         | 9          | 1          |            |            |           |           |           |           |           |           |           | 70           |
| A-T                              | 6          | 52         | 2          |            |            |           |           |           |           |           |           |           | 60           |
| DGS                              | 46         | 9          |            | 1          |            |           |           |           |           |           |           |           | 56           |
| <b>Total (Top 12)</b>            | <b>398</b> | <b>492</b> | <b>134</b> | <b>106</b> | <b>100</b> | <b>50</b> | <b>68</b> | <b>60</b> | <b>52</b> | <b>42</b> | <b>30</b> | <b>49</b> | <b>1,581</b> |
| %                                | 25         | 31         | 8          | 7          | 6          | 3         | 4         | 4         | 3         | 3         | 2         | 3         | 100          |
| <b>Total (all PID)</b>           | <b>616</b> | <b>680</b> | <b>201</b> | <b>133</b> | <b>120</b> | <b>54</b> | <b>74</b> | <b>64</b> | <b>54</b> | <b>46</b> | <b>34</b> | <b>53</b> | <b>2,129</b> |
| %                                | 29         | 32         | 9          | 6          | 6          | 3         | 3         | 3         | 3         | 2         | 2         | 2         | 100          |

S40: Onset of the 12 most common PIDs

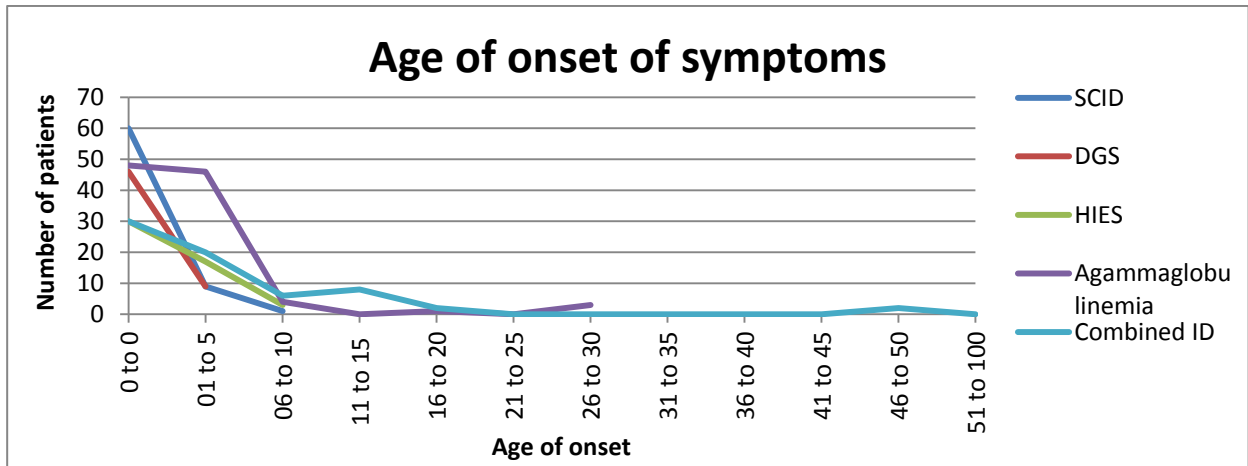

S41: Onset of symptoms mainly in the first year of life

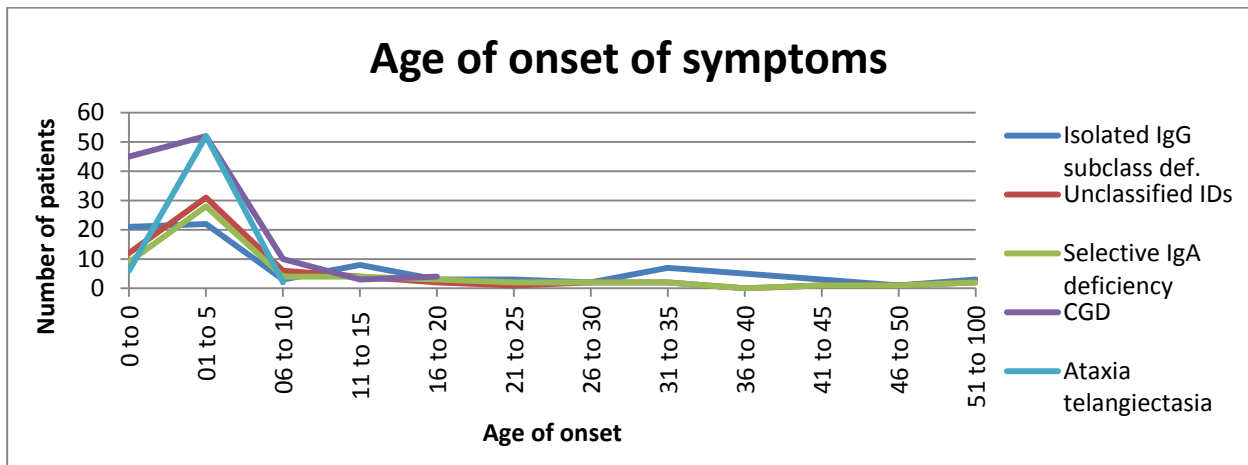

S42: Onset of symptoms mainly between the ages of 1 to 5

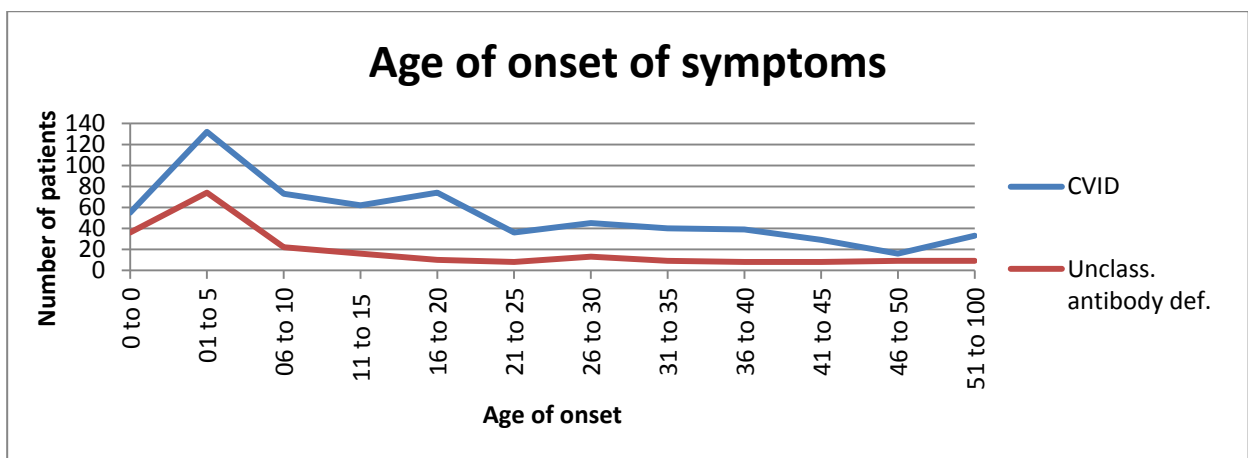

S43: Onset of symptoms with main onset age of 1 to 5 years and late onset

| Main category                           | PID                       | Gene                   | Number of patients | Symptoms after genetic diagnosis [years] |
|-----------------------------------------|---------------------------|------------------------|--------------------|------------------------------------------|
| <b>Complement deficiencies</b>          | HAE (C1Inh)               | <i>C1 Inhibitor</i>    | 2                  | Between 1 and 4                          |
| <b>Diseases of immune dysregulation</b> | ALPS                      | <i>FAS (TNFRSF6)</i>   | 1                  | 1                                        |
|                                         | FHLH                      | <i>PRF1</i>            | 1                  | 1*                                       |
| <b>Other well defined PIDs</b>          | Cartilage hair hypoplasia | <i>RMRP</i>            | 1                  | 2                                        |
|                                         | DGS                       | <i>Del 22q11.2</i>     | 2                  | 1**                                      |
|                                         | HIES                      | <i>STAT3</i>           | 1                  | 1                                        |
|                                         | XLT (WASP)                | <i>WASP (X-linked)</i> | 1                  | 1                                        |
| <b>Phagocytic disorders</b>             | G6PD                      | <i>G6PD</i>            | 1                  | 1                                        |

S44: Genetic diagnosis before onset of symptoms

\* prenatal genetic diagnosis

\*\* One of the two patients had a prenatal diagnosis.



| 12 PIDs                                 | Number of patients | Patients with genetic defect | Average of genetic diagnostic delay [years] | Median of genetic diagnostic delay [years] |
|-----------------------------------------|--------------------|------------------------------|---------------------------------------------|--------------------------------------------|
| <b>CVID</b>                             | 527                | 12                           | 11.08                                       | 9                                          |
| <b>HIES</b>                             | 43                 | 37                           | 7.84                                        | 7                                          |
| <b>Unclassified antibody deficiency</b> | 168                | 2                            | 7.00                                        | 7                                          |
| <b>Combined ID</b>                      | 51                 | 21                           | 6.90                                        | 5                                          |
| <b>CGD</b>                              | 89                 | 75                           | 4.55                                        | 2                                          |
| <b>Agammaglobulinemia</b>               | 87                 | 68                           | 3.90                                        | 1                                          |
| <b>A-T</b>                              | 49                 | 42                           | 3.26                                        | 3                                          |
| <b>SCID</b>                             | 40                 | 24                           | 1.42                                        | 0.5                                        |
| <b>DGS</b>                              | 38                 | 33                           | 0.48                                        | 0                                          |
| <b>Unclassified IDs</b>                 | 50                 | 0                            |                                             |                                            |
| <b>Isolated IgG subclass deficiency</b> | 64                 | 0                            |                                             |                                            |
| <b>Selective IgA deficiency</b>         | 37                 | 0                            |                                             |                                            |
| <b>Total</b>                            | <b>1,243</b>       | <b>314</b>                   | <b>4.38</b>                                 | <b>2</b>                                   |

S46: Average and median of genetic diagnostic delay

| Main cause(s) leading to death                             |                        |                    |              |      |              |               |                     |               |               |                        |             |            |                            |                        |               |                       |                         |                           | Underlying morbid setting(s) associated with mortality |                                 |       |           |            |                      |                         |       |                             |
|------------------------------------------------------------|------------------------|--------------------|--------------|------|--------------|---------------|---------------------|---------------|---------------|------------------------|-------------|------------|----------------------------|------------------------|---------------|-----------------------|-------------------------|---------------------------|--------------------------------------------------------|---------------------------------|-------|-----------|------------|----------------------|-------------------------|-------|-----------------------------|
| PID                                                        | Gene                   | Number of patients | Age [year]   | HSCt | Septic shock | Heart failure | Respiratory failure | Liver failure | Renal failure | Multiple organ failure | Haemorrhage | Thrombosis | Neurological complications | Surgical complications | Drug toxicity | Relapse of malignancy | Veno occlusive disorder | Graft versus host disease | Post-transplant lymphoproliferative disorder           | Rejection/poor graft transplant | Other | Infection | Malignancy | Immune dysregulation | Transplantation related | Other |                             |
|                                                            |                        |                    |              |      |              |               |                     |               |               |                        |             |            |                            |                        |               |                       |                         |                           |                                                        |                                 |       |           |            |                      |                         |       | Ataxia telangiectasia (A-T) |
| Atypical severe combined immuno-deficiency (Atypical SCID) | <i>RAG1</i>            | 1                  | 23           | 1    | 1            |               | 1                   |               |               | 1                      | 1           |            |                            |                        |               |                       |                         |                           |                                                        |                                 |       |           |            |                      | 1                       |       |                             |
| Cartilage hair hypoplasia                                  | <i>RMRP</i>            | 1                  | 18           |      |              | 1             |                     |               |               |                        |             |            |                            |                        |               |                       |                         |                           |                                                        |                                 |       |           |            |                      | 1                       |       |                             |
| Chronic granulomatous disease (CGD)                        |                        | 7                  |              | 2    |              |               | 2                   |               | 1             | 3                      | 1           |            |                            | 2                      |               |                       |                         | 3                         |                                                        |                                 |       |           | 3          |                      | 2                       | 2     |                             |
|                                                            | <i>GP91-phox(CYBB)</i> | 4                  | 6, 10,19, 20 | 2    |              |               | 2                   |               | 1             | 2                      | 1           |            |                            | 1                      |               |                       |                         | 3                         |                                                        |                                 |       |           | 2          |                      | 1                       | 2     |                             |
|                                                            | <i>P47-phox(NCF1)</i>  | 1                  | 62           |      |              |               |                     |               |               |                        |             |            |                            |                        |               |                       |                         |                           |                                                        |                                 |       |           |            |                      |                         |       |                             |
|                                                            | N/A                    | 2                  | 1            |      |              |               |                     |               |               | 1                      |             |            |                            | 1                      |               |                       |                         |                           |                                                        |                                 |       |           | 1          |                      | 1                       |       |                             |
| Combined immuno-deficiency (CID)                           |                        | 5                  |              | 2    | 1            |               | 2                   |               |               | 3                      |             |            |                            |                        |               |                       |                         |                           |                                                        |                                 |       |           | 4          |                      | 1                       | 1     |                             |
|                                                            | <i>Orai1(TMEM142A)</i> | 1                  | 1            | 1    |              |               | 1                   |               |               |                        |             |            |                            |                        |               |                       |                         |                           |                                                        |                                 |       |           | 1          |                      |                         |       |                             |
|                                                            | <i>PRKDC</i>           | 2                  | 7, 23        |      |              |               |                     |               |               | 2                      |             |            |                            |                        |               |                       |                         |                           |                                                        |                                 |       |           | 2          |                      |                         |       |                             |
|                                                            | N/A                    | 2                  | 3,18         | 1    | 1            |               | 1                   |               |               | 1                      |             |            |                            |                        |               |                       |                         |                           |                                                        |                                 |       |           | 1          |                      | 1                       | 1     |                             |

| Main cause(s) leading to death                               |                 |                    |            |       |              |               |                     |               |               |                        |             |            |                            |                        |               |                       |                         | Underlying morbid setting(s) associated with mortality |                                              |                                 |       |           |            |                      |                         |       |
|--------------------------------------------------------------|-----------------|--------------------|------------|-------|--------------|---------------|---------------------|---------------|---------------|------------------------|-------------|------------|----------------------------|------------------------|---------------|-----------------------|-------------------------|--------------------------------------------------------|----------------------------------------------|---------------------------------|-------|-----------|------------|----------------------|-------------------------|-------|
| PID                                                          | Gene            | Number of patients | Age [year] | HSCCT | Septic shock | Heart failure | Respiratory failure | Liver failure | Renal failure | Multiple organ failure | Haemorrhage | Thrombosis | Neurological complications | Surgical complications | Drug toxicity | Relapse of malignancy | Veno occlusive disorder | Graft versus host disease                              | Post-transplant lymphoproliferative disorder | Rejection/poor graft transplant | Other | Infection | Malignancy | Immune dysregulation | Transplantation related | Other |
|                                                              |                 |                    |            |       |              |               |                     |               |               |                        |             |            |                            |                        |               |                       |                         |                                                        |                                              |                                 |       |           |            |                      |                         |       |
| Common variable immunodeficiency disorders (CVID)            | N/A             | 12                 | 18-88      | 1     | 3            | 3             |                     | 1             |               | 1                      | 1           |            |                            |                        |               |                       |                         |                                                        |                                              |                                 | 1*    | 1         | 5          | 3                    | 1                       | 1**   |
| Complement component 1 deficiency                            | <i>C1Q-beta</i> | 1                  | 14         |       |              |               |                     |               |               |                        |             |            |                            |                        |               |                       |                         |                                                        |                                              |                                 | 1**   |           |            | 1                    |                         |       |
| Familial hemophagocytic lymphohistiocytosis syndromes (FHLH) | <i>PRF1</i>     | 1                  | 10 month   | 1     |              |               | 1                   |               |               |                        |             |            |                            |                        |               |                       |                         |                                                        |                                              |                                 |       | 1         |            |                      |                         |       |
| HLA class II deficiency                                      | <i>RFXAP</i>    | 1                  | 16         | 1     |              |               |                     |               |               | 1                      |             |            |                            |                        |               |                       |                         |                                                        |                                              |                                 |       | 1         |            |                      |                         |       |
| Isolated IgG subclass deficiency                             | N/A             | 1                  | N/A        |       |              |               |                     |               |               |                        |             |            |                            |                        |               |                       |                         |                                                        |                                              |                                 |       |           |            |                      |                         |       |
| Nijmegen breakage syndrome (NBS1)                            | <i>NBS1</i>     | 1                  | 15         |       |              |               |                     |               |               |                        |             |            |                            |                        |               |                       |                         |                                                        |                                              |                                 |       |           |            |                      |                         |       |
| Omenn syndrome                                               | <i>RAG1</i>     | 1                  | 5 month    | 1     |              |               | 1                   |               |               |                        |             |            |                            |                        |               |                       |                         |                                                        |                                              |                                 |       | 1         |            |                      |                         |       |
| Properdin P factor complement deficiency (PFC)               | N/A             | 1                  | 18         |       | 1            |               |                     |               |               |                        |             |            |                            |                        |               |                       |                         |                                                        |                                              |                                 |       | 1         |            |                      |                         |       |



| Main cause(s) leading to death                 |      |                    |            |       |              |               |                     |               |               |                        |             |            |                            |                        |               |                       |                         | Underlying morbid setting(s) associated with mortality |                                              |                                 |       |           |            |                      |                         |       |
|------------------------------------------------|------|--------------------|------------|-------|--------------|---------------|---------------------|---------------|---------------|------------------------|-------------|------------|----------------------------|------------------------|---------------|-----------------------|-------------------------|--------------------------------------------------------|----------------------------------------------|---------------------------------|-------|-----------|------------|----------------------|-------------------------|-------|
| PID                                            | Gene | Number of patients | Age [year] | HSCCT | Septic shock | Heart failure | Respiratory failure | Liver failure | Renal failure | Multiple organ failure | Haemorrhage | Thrombosis | Neurological complications | Surgical complications | Drug toxicity | Relapse of malignancy | Veno occlusive disorder | Graft versus host disease                              | Post-transplant lymphoproliferative disorder | Rejection/poor graft transplant | Other | Infection | Malignancy | Immune dysregulation | Transplantation related | Other |
|                                                |      |                    |            |       |              |               |                     |               |               |                        |             |            |                            |                        |               |                       |                         |                                                        |                                              |                                 |       |           |            |                      |                         |       |
|                                                | RAG1 | 1                  | 1          | 1     |              |               | 1                   |               |               |                        |             |            |                            |                        |               |                       |                         |                                                        |                                              |                                 |       | 1         |            |                      |                         |       |
|                                                | N/A  | 2                  | 4 month    | 1     | 1            |               | 2                   |               |               | 1                      |             |            |                            |                        |               |                       |                         |                                                        |                                              |                                 |       | 1         |            |                      |                         |       |
| Steinert myotonia dystrophia                   | ZNF9 | 1                  | 70         |       |              |               |                     |               |               |                        |             |            |                            |                        |               |                       |                         |                                                        |                                              |                                 |       |           |            |                      |                         |       |
| Unclassified antibody deficiency               |      | 4                  |            | 1     |              |               | 3                   |               |               | 1                      |             |            |                            |                        | 1             |                       |                         |                                                        |                                              |                                 |       | 3         | 1          |                      |                         |       |
|                                                | LRBA | 1                  | 12         | 1     |              |               | 1                   |               |               |                        |             |            |                            |                        |               |                       |                         |                                                        |                                              |                                 |       | 1         |            |                      |                         |       |
|                                                | N/A  | 3                  | 14,17,79   |       |              |               | 2                   |               |               | 1                      |             |            |                            |                        | 1             |                       |                         |                                                        |                                              |                                 |       | 2         | 1          |                      |                         |       |
| Unclassified autoinflammatory diseases         | N/A  | 1                  | 14         | 1     |              | 1             | 1                   |               |               |                        |             |            |                            |                        |               |                       |                         |                                                        |                                              |                                 |       |           |            | 1                    |                         |       |
| Unclassified disorders of immune dysregulation | N/A  | 1                  | N/A        |       |              |               |                     |               |               |                        |             |            |                            |                        |               |                       |                         |                                                        |                                              |                                 |       |           |            |                      |                         |       |

| Main cause(s) leading to death |                   |                    |            |           |              |               |                     |               |               |                        |             |            |                            |                        |               |                       |                         |                           |                                              | Underlying morbid setting(s) associated with mortality |          |           |            |                      |                         |          |
|--------------------------------|-------------------|--------------------|------------|-----------|--------------|---------------|---------------------|---------------|---------------|------------------------|-------------|------------|----------------------------|------------------------|---------------|-----------------------|-------------------------|---------------------------|----------------------------------------------|--------------------------------------------------------|----------|-----------|------------|----------------------|-------------------------|----------|
| PID                            | Gene              | Number of patients | Age [year] | HSCCT     | Septic shock | Heart failure | Respiratory failure | Liver failure | Renal failure | Multiple organ failure | Haemorrhage | Thrombosis | Neurological complications | Surgical complications | Drug toxicity | Relapse of malignancy | Veno occlusive disorder | Graft versus host disease | Post-transplant lymphoproliferative disorder | Rejection/poor graft transplant                        | Other    | Infection | Malignancy | Immune dysregulation | Transplantation related | Other    |
|                                |                   |                    |            |           |              |               |                     |               |               |                        |             |            |                            |                        |               |                       |                         |                           |                                              |                                                        |          |           |            |                      |                         |          |
|                                | BIRC4/XIAP (XLP2) | 1                  | 19         | 1         |              |               |                     |               |               | 1                      |             |            |                            |                        |               |                       |                         |                           |                                              |                                                        |          |           |            |                      | 1                       |          |
|                                | SH2D1A (XLP1)     | 1                  | 24         |           |              |               |                     |               |               |                        |             |            |                            |                        |               |                       |                         |                           |                                              |                                                        |          |           |            |                      |                         |          |
| <b>Total</b>                   |                   | <b>51</b>          |            | <b>14</b> | <b>9</b>     | <b>5</b>      | <b>16</b>           | <b>2</b>      | <b>1</b>      | <b>13</b>              | <b>4</b>    |            | <b>1</b>                   | <b>2</b>               |               | <b>1</b>              |                         | <b>3</b>                  | <b>0</b>                                     | <b>0</b>                                               | <b>2</b> | <b>20</b> | <b>8</b>   | <b>9</b>             | <b>7</b>                | <b>1</b> |

S47: Cause of death for 51 patients

\* Hemolysis due to T-LGL lymphoma, \*\* chronic pancreatitis, \*\*\* Heart disease, myocardial infection

| PID                        | Number of patients (total) | IgG substitution unknown | %   | No IgG substitution | %    |
|----------------------------|----------------------------|--------------------------|-----|---------------------|------|
| Selective IgA deficiency   | 69                         | 24                       | 35% | 45                  | 65%  |
| Congenital neutropenia     | 32                         | 1                        | 3%  | 31                  | 97%  |
| FMF                        | 24                         | 3                        | 12% | 21                  | 88%  |
| HAE (C1Inh)                | 23                         | 3                        | 13% | 20                  | 87%  |
| TRAPS                      | 18                         | 3                        | 17% | 15                  | 83%  |
| Shwachman-Diamond-syndrome | 11                         | 0                        | 0%  | 11                  | 100% |

S48: PID with no IgG substitution (PIDs with minimum 10 patients of 270 patients)

| PID / IgG substitution delay [Years] | -20  | -11 | -10 | -6 | -5 | -4 | -3 | -2 | -1  | 0  | 1  | 2 | 3  | 4 | 5 | 6 | 7 | 8 | 9 | 10 | 11 | 12 | 13 | 14 | 15 | 16 | 17 | 18 | 19 | 20 | 21 | 22 | 23 | 24 | 26 | 27 | 29 | 30 | 31 | 34 | 36 | 40 | 41 | 53  | Number of patients with information available date |
|--------------------------------------|------|-----|-----|----|----|----|----|----|-----|----|----|---|----|---|---|---|---|---|---|----|----|----|----|----|----|----|----|----|----|----|----|----|----|----|----|----|----|----|----|----|----|----|----|-----|----------------------------------------------------|
|                                      | CVID | 1   | 1   | 1  | 2  | 3  | 7  | 9  | 346 | 94 | 28 | 8 | 14 | 6 | 8 | 8 | 9 | 8 | 4 | 2  | 4  | 3  | 3  | 1  | 3  | 1  | 6  | 2  | 2  | 1  | 2  | 1  | 1  | 1  | 1  | 1  | 1  | 1  | 1  | 1  | 1  | 2  | 1  | 598 |                                                    |
| Unclassified antibody def.           |      | 1   |     | 1  |    | 4  | 83 | 37 | 5   | 5  | 6  | 5 | 3  | 3 | 1 | 1 | 1 |   | 1 | 1  |    | 1  | 1  | 1  | 1  | 1  |    |    |    |    |    |    |    |    |    |    |    |    |    |    |    |    |    | 160 |                                                    |
| CGD                                  |      |     |     |    |    |    |    |    | 2   |    | 2  |   |    |   |   | 2 |   |   |   |    |    |    |    | 1  |    |    |    |    |    |    |    |    |    |    |    |    |    |    |    |    |    |    |    | 7   |                                                    |
| Agamma-globulinemia                  |      |     |     |    |    |    | 1  | 1  | 71  | 10 | 1  | 1 | 1  | 1 | 1 | 1 | 1 | 1 | 1 |    |    |    |    |    | 2  |    | 1  |    |    |    |    |    |    |    |    |    |    | 1  |    |    |    |    |    | 94  |                                                    |
| Isolated IgG subclass deficiency     |      |     |     |    |    |    |    |    | 33  | 10 | 5  | 4 |    | 3 | 1 | 1 | 1 | 1 | 1 |    | 1  |    |    |    |    |    |    |    |    |    |    |    |    |    |    |    |    |    |    |    |    |    |    |     | 60                                                 |
| SCID                                 |      |     |     |    |    |    |    | 18 |     | 1  |    |   | 1  |   |   |   |   |   |   |    |    |    |    |    |    |    |    |    |    |    |    |    |    |    |    |    |    |    |    |    |    |    |    | 20  |                                                    |
| Combined ID                          | 1    |     |     |    |    |    | 2  | 25 | 9   | 1  |    |   |    |   |   |   | 2 |   |   |    |    |    | 1  |    | 1  |    |    |    |    |    |    |    |    |    |    |    |    |    |    |    |    |    |    | 43  |                                                    |
| Selective IgA deficiency             |      |     |     |    |    |    |    |    | 1   |    |    |   |    |   |   |   |   |   |   |    |    |    |    |    |    |    |    |    |    |    |    |    |    |    |    |    |    |    |    |    |    |    |    | 1   |                                                    |
| DGS                                  |      |     |     |    |    |    | 1  | 1  | 1   |    |    |   |    |   |   |   |   |   | 1 |    |    |    |    |    |    |    |    |    |    |    |    |    |    |    |    |    |    |    |    |    |    |    |    | 4   |                                                    |
| A-T                                  |      |     |     |    | 1  |    | 6  | 2  | 2   | 1  | 3  |   | 1  | 2 | 1 | 1 |   |   |   |    |    | 1  | 1  |    |    |    |    |    |    |    |    |    |    |    |    |    |    |    |    |    |    |    |    | 22  |                                                    |
| Unclassified IDs                     |      |     |     |    |    |    | 2  | 11 | 2   | 1  |    |   | 1  |   |   |   |   | 1 | 1 |    |    |    |    |    |    |    |    |    |    |    |    |    |    |    |    |    |    |    |    | 1  | 1  |    |    | 21  |                                                    |
| HIES                                 |      |     |     |    |    |    | 1  | 5  | 1   | 1  |    | 1 | 1  |   |   |   |   | 1 | 3 |    |    |    |    |    |    |    | 1  |    |    |    |    |    |    |    |    |    |    |    |    |    |    |    |    | 16  |                                                    |
| ALPS                                 |      |     |     |    |    |    |    |    |     | 1  |    |   |    |   |   |   |   |   |   |    |    |    |    |    |    |    |    |    |    |    |    |    |    |    |    |    |    |    |    |    |    |    |    | 1   |                                                    |
| CSR/HIGM (Hyper-IgM)                 |      |     |     |    |    |    | 1  | 1  | 19  | 3  |    |   |    |   |   |   |   |   |   |    |    |    |    |    |    |    |    |    |    |    |    |    |    |    |    |    |    |    |    |    | 1  |    |    | 25  |                                                    |
| XLP                                  |      |     |     |    |    |    |    | 1  | 4   | 1  |    |   |    |   |   |   |   |   |   |    |    |    |    | 1  |    |    |    |    |    |    |    |    |    |    |    |    |    |    |    |    |    |    |    | 7   |                                                    |
| Congenital neutropenia               |      |     |     |    |    |    |    |    |     |    |    |   |    |   |   |   |   |   |   |    |    |    |    |    |    |    |    |    |    |    |    |    |    |    |    |    |    |    |    |    |    |    |    | 0   |                                                    |
| WAS                                  |      |     |     |    |    |    | 1  | 3  | 2   |    |    |   |    |   |   |   |   |   |   |    |    |    |    |    |    |    |    |    |    |    |    |    |    |    |    |    |    |    |    |    |    |    |    | 7   |                                                    |
| IgA with IgG subclass def.           |      |     |     |    |    |    | 1  | 8  | 2   |    | 1  |   |    |   |   |   |   | 1 | 1 |    |    |    |    |    |    |    |    |    |    |    |    |    |    |    |    |    |    |    |    |    |    |    |    | 14  |                                                    |
| FMF                                  |      |     |     |    |    |    |    |    |     |    |    |   |    |   |   |   |   |   |   |    |    |    |    |    |    |    |    |    |    |    |    |    |    |    |    |    |    |    |    |    |    |    |    | 0   |                                                    |
| HAE (C1Inh)                          |      |     |     |    |    |    |    |    |     |    |    |   |    |   |   |   |   |   |   |    |    |    |    |    |    |    |    |    |    |    |    |    |    |    |    |    |    |    |    |    |    |    |    | 0   |                                                    |

| PID / IgG substitution delay [Years]           | -20                                        | -11 | -10 | -6 | -5 | -4 | -3 | -2 | -1 | 0 | 1 | 2 | 3 | 4 | 5 | 6 | 7 | 8 | 9 | 10 | 11 | 12 | 13 | 14 | 15 | 16 | 17 | 18 | 19 | 20 | 21 | 22 | 23 | 24 | 26 | 27 | 29 | 30 | 31 | 34 | 36 | 40 | 41 | 53 | Number of patients with information available date |  |  |   |   |
|------------------------------------------------|--------------------------------------------|-----|-----|----|----|----|----|----|----|---|---|---|---|---|---|---|---|---|---|----|----|----|----|----|----|----|----|----|----|----|----|----|----|----|----|----|----|----|----|----|----|----|----|----|----------------------------------------------------|--|--|---|---|
|                                                | Transient hypogammaglobulinemia of infancy |     |     |    |    |    |    |    |    |   | 5 |   |   |   |   |   |   |   |   |    |    |    |    |    |    |    |    |    |    |    |    |    |    |    |    |    |    |    |    |    |    |    |    |    |                                                    |  |  | 5 |   |
| FHLH                                           |                                            |     |     |    |    |    |    |    |    | 2 |   |   |   |   |   |   |   |   |   |    |    |    |    |    |    |    |    |    |    |    |    |    |    |    |    |    |    |    |    |    |    |    |    |    |                                                    |  |  |   | 2 |
| Unclassified autoinflammatory                  |                                            |     |     |    |    |    |    |    |    |   |   |   |   |   |   |   |   |   |   |    |    |    |    |    |    |    |    |    |    |    |    |    |    |    |    |    |    |    |    |    |    |    |    |    |                                                    |  |  | 0 |   |
| CMC                                            |                                            |     |     |    |    |    |    |    |    | 1 |   | 1 |   |   |   |   |   |   | 1 |    |    |    | 1  |    |    |    |    |    |    |    |    |    |    |    |    |    |    |    |    |    |    |    |    |    |                                                    |  |  | 5 |   |
| Unclassified disorders of immune dysregulation |                                            |     |     |    |    |    |    |    |    | 3 |   |   |   |   |   |   |   | 1 |   |    |    |    |    |    |    |    |    |    |    |    |    |    |    |    |    |    |    |    |    |    |    |    |    |    |                                                    |  |  | 4 |   |
| TRAPS                                          |                                            |     |     |    |    |    |    |    |    |   |   |   |   |   |   |   |   |   |   |    |    |    |    |    |    |    |    |    |    |    |    |    |    |    |    |    |    |    |    |    |    |    |    |    |                                                    |  |  | 0 |   |
| Specific IgG def. (SPAD)                       |                                            |     |     |    |    | 1  |    |    |    | 2 | 1 | 1 |   | 2 | 1 |   |   |   |   |    |    |    |    |    |    |    |    |    |    |    |    |    |    |    |    |    |    |    |    |    |    |    |    |    |                                                    |  |  | 8 |   |
| Syndromic PID, unclassified                    |                                            |     |     | 1  |    |    |    |    |    | 3 | 2 |   | 1 |   | 2 |   |   |   |   |    |    |    |    |    |    |    |    |    |    |    |    |    |    |    |    |    |    |    |    |    |    |    |    |    |                                                    |  |  | 9 |   |
| Innate ID, unclassified                        |                                            |     |     |    |    |    |    |    |    | 2 | 1 | 1 |   |   |   |   |   |   |   |    |    |    |    |    |    |    |    |    |    |    |    |    |    |    |    |    |    |    |    |    |    |    |    |    |                                                    |  |  | 4 |   |
| Shwachman-Diamond-syndrome                     |                                            |     |     |    |    |    |    |    |    |   |   |   |   |   |   |   |   |   |   |    |    |    |    |    |    |    |    |    |    |    |    |    |    |    |    |    |    |    |    |    |    |    |    |    |                                                    |  |  | 0 |   |
| NBS1                                           |                                            |     |     |    |    | 1  |    |    |    | 1 | 1 |   | 1 | 1 | 1 |   |   |   |   |    |    |    | 1  |    |    |    |    |    |    |    |    |    |    |    |    |    |    |    |    |    |    |    |    |    |                                                    |  |  | 7 |   |
| Unclassified phagocytic disorders              |                                            |     |     |    |    |    |    |    |    |   |   | 1 |   |   |   |   |   |   |   |    |    |    |    |    |    |    |    |    |    |    |    |    |    |    |    |    |    |    |    |    |    |    |    |    |                                                    |  |  | 1 |   |
| TLR/NF kappa-B                                 |                                            |     |     |    |    |    |    | 1  |    | 1 | 3 | 1 |   |   |   |   |   |   |   |    |    |    |    |    |    |    |    |    |    |    |    |    |    |    |    |    |    |    |    |    |    |    |    |    |                                                    |  |  | 6 |   |
| Nothing entered                                |                                            |     |     |    |    |    |    |    |    | 2 |   |   |   |   |   |   |   |   |   |    |    |    |    |    |    |    |    |    |    |    |    |    |    |    |    |    |    |    |    |    |    |    |    |    |                                                    |  |  | 2 |   |
| MSMD                                           |                                            |     |     |    |    |    |    |    |    |   | 1 |   |   |   | 1 |   |   |   |   |    |    |    |    |    |    |    |    |    |    |    |    |    |    |    |    |    |    |    |    |    |    |    |    |    |                                                    |  |  | 2 |   |
| Atypical SCID                                  |                                            |     |     |    |    |    |    |    |    | 1 | 1 |   |   |   |   |   |   |   |   |    |    |    |    |    |    |    |    |    |    |    |    |    |    |    |    |    |    |    |    |    |    |    |    |    |                                                    |  |  | 2 |   |



| PID / IgG substitution delay [Years] | -20     | -11 | -10 | -6 | -5 | -4 | -3 | -2 | -1 | 0 | 1 | 2 | 3 | 4 | 5 | 6 | 7 | 8 | 9 | 10 | 11 | 12 | 13 | 14 | 15 | 16 | 17 | 18 | 19 | 20 | 21 | 22 | 23 | 24 | 26 | 27 | 29 | 30 | 31 | 34 | 36 | 40 | 41 | 53 | Number of patients with information available date |  |   |   |
|--------------------------------------|---------|-----|-----|----|----|----|----|----|----|---|---|---|---|---|---|---|---|---|---|----|----|----|----|----|----|----|----|----|----|----|----|----|----|----|----|----|----|----|----|----|----|----|----|----|----------------------------------------------------|--|---|---|
|                                      | MonoMAC |     |     |    | 1  |    |    |    |    |   | 1 |   |   |   |   |   |   |   |   |    |    |    |    |    |    |    |    |    |    |    |    |    |    |    |    |    |    |    |    |    |    |    |    |    |                                                    |  |   | 2 |
| Steinert myotonic dystrophia         |         |     |     |    |    |    |    |    |    |   | 1 |   |   |   |   |   |   |   |   |    |    |    |    |    |    |    |    |    |    |    |    |    |    |    |    |    |    |    |    |    |    |    |    |    |                                                    |  |   | 1 |
| C8 deficiency                        |         |     |     |    |    |    |    |    |    |   |   |   |   |   |   |   |   |   |   |    |    |    |    |    |    |    |    |    |    |    |    |    |    |    |    |    |    |    |    |    |    |    |    |    |                                                    |  | 0 |   |
| Griscelli, type 2                    |         |     |     |    |    |    |    |    |    |   |   |   |   |   |   |   |   |   |   |    |    |    |    |    |    |    |    |    |    |    |    |    |    |    |    |    |    |    |    |    |    |    |    |    |                                                    |  | 0 |   |
| Early-onset multi-organ AI           |         |     |     |    |    |    | 1  |    |    |   | 1 |   |   |   |   |   |   |   |   |    |    |    |    |    |    |    |    |    |    |    |    |    |    |    |    |    |    |    |    |    |    |    |    |    |                                                    |  | 2 |   |
| Thymoma with immunodeficiency        |         |     |     |    |    |    |    |    |    | 2 |   |   |   |   |   |   |   |   |   |    |    |    |    |    |    |    |    |    |    |    |    |    |    |    |    |    |    |    |    |    |    |    |    |    |                                                    |  | 2 |   |
| ICF                                  |         |     |     |    |    |    |    |    |    | 1 |   |   |   |   |   |   |   |   |   |    |    |    |    |    |    |    |    |    |    |    |    |    |    |    |    |    |    |    |    |    |    |    |    |    |                                                    |  | 1 |   |
| CD4 deficiency                       |         |     |     |    |    |    |    |    |    |   |   |   |   |   |   |   |   |   |   |    |    |    |    |    |    |    |    |    |    |    |    |    |    |    |    |    |    |    |    |    |    |    |    |    |                                                    |  | 0 |   |
| FCAS                                 |         |     |     |    |    |    |    |    |    |   |   |   |   |   |   |   |   |   |   |    |    |    |    |    |    |    |    |    |    |    |    |    |    |    |    |    |    |    |    |    |    |    |    |    |                                                    |  | 0 |   |
| Isolated congenital asplenia         |         |     |     |    |    |    |    |    |    |   |   |   |   |   |   |   |   |   |   |    |    |    |    |    |    |    |    |    |    |    |    |    |    |    |    |    |    |    |    |    |    |    |    |    |                                                    |  | 0 |   |
| LAD                                  |         |     |     |    |    |    |    |    |    |   |   |   |   |   |   |   |   |   |   |    |    |    |    |    |    |    |    |    |    |    |    |    |    |    |    |    |    |    |    |    |    |    |    |    |                                                    |  | 0 |   |
| PFC                                  |         |     |     |    |    |    |    |    |    |   |   |   |   |   |   |   |   |   |   |    |    |    |    |    |    |    |    |    |    |    |    |    |    |    |    |    |    |    |    |    |    |    |    |    |                                                    |  | 0 |   |
| Schimke disease                      |         |     |     |    |    |    |    |    |    |   |   |   |   |   |   |   |   |   |   |    |    |    |    |    |    |    |    |    |    |    |    |    |    |    |    |    |    |    |    |    |    |    |    |    |                                                    |  | 0 |   |
| Bloom syndrome                       |         |     |     |    |    |    |    | 1  |    |   |   |   |   |   |   |   |   |   |   |    |    |    |    |    |    |    |    |    |    |    |    |    |    |    |    |    |    |    |    |    |    |    |    |    |                                                    |  |   | 1 |
| C1 deficiency                        |         |     |     |    |    |    |    |    |    |   |   |   |   |   | 1 |   |   |   |   |    |    |    |    |    |    |    |    |    |    |    |    |    |    |    |    |    |    |    |    |    |    |    |    |    |                                                    |  | 1 |   |
| CD27 deficiency                      |         |     |     |    |    |    |    |    |    |   |   | 1 |   |   |   |   |   |   |   |    |    |    |    |    |    |    |    |    |    |    |    |    |    |    |    |    |    |    |    |    |    |    |    |    |                                                    |  | 1 |   |
| PMS2 deficiency                      |         |     |     |    |    |    |    |    |    | 1 |   |   |   |   |   |   |   |   |   |    |    |    |    |    |    |    |    |    |    |    |    |    |    |    |    |    |    |    |    |    |    |    |    |    |                                                    |  | 1 |   |
| Type 1 interferonopathies            |         |     |     |    |    |    |    |    |    |   |   |   |   | 1 |   |   |   |   |   |    |    |    |    |    |    |    |    |    |    |    |    |    |    |    |    |    |    |    |    |    |    |    |    |    |                                                    |  | 1 |   |
| C7 deficiency                        |         |     |     |    |    |    |    |    |    |   |   |   |   |   |   |   |   |   |   |    |    |    |    |    |    |    |    |    |    |    |    |    |    |    |    |    |    |    |    |    |    |    |    |    |                                                    |  | 0 |   |
| CD25 deficiency                      |         |     |     |    |    |    |    |    |    |   |   |   |   |   |   |   |   |   |   |    |    |    |    |    |    |    |    |    |    |    |    |    |    |    |    |    |    |    |    |    |    |    |    |    |                                                    |  | 0 |   |

| PID / IgG substitution delay [Years] | -20      | -11      | -10      | -6       | -5       | -4       | -3       | -2        | -1        | 0          | 1          | 2         | 3         | 4         | 5         | 6         | 7         | 8         | 9        | 10        | 11       | 12       | 13       | 14       | 15       | 16       | 17       | 18       | 19       | 20       | 21       | 22       | 23       | 24       | 26       | 27       | 29       | 30       | 31       | 34       | 36       | 40       | 41       | 53       | Number of patients with information available date |              |   |   |   |
|--------------------------------------|----------|----------|----------|----------|----------|----------|----------|-----------|-----------|------------|------------|-----------|-----------|-----------|-----------|-----------|-----------|-----------|----------|-----------|----------|----------|----------|----------|----------|----------|----------|----------|----------|----------|----------|----------|----------|----------|----------|----------|----------|----------|----------|----------|----------|----------|----------|----------|----------------------------------------------------|--------------|---|---|---|
| Factor I deficiency                  |          |          |          |          |          |          |          |           |           |            |            |           |           |           |           |           |           |           |          |           |          |          |          |          |          |          |          |          |          |          |          |          |          |          |          |          |          |          |          |          |          |          |          |          |                                                    |              | 0 |   |   |
| Fc receptor deficiencies             |          |          |          |          |          |          |          |           |           |            |            |           |           |           |           |           |           |           |          |           |          |          |          |          |          |          |          |          |          |          |          |          |          |          |          |          |          |          |          |          |          |          |          |          |                                                    |              |   |   | 0 |
| G6PD                                 |          |          |          |          |          |          |          |           |           |            |            |           |           |           |           |           |           |           |          |           |          |          |          |          |          |          |          |          |          |          |          |          |          |          |          |          |          |          |          |          |          |          |          |          |                                                    |              |   | 0 |   |
| GSD 1b                               |          |          |          |          |          |          |          |           |           |            |            |           |           |           |           |           |           |           |          |           |          |          |          |          |          |          |          |          |          |          |          |          |          |          |          |          |          |          |          |          |          |          |          |          |                                                    |              |   | 0 |   |
| Hermansky-Pudlak syndrome            |          |          |          |          |          |          |          |           |           |            |            |           |           |           |           |           |           |           |          |           |          |          |          |          |          |          |          |          |          |          |          |          |          |          |          |          |          |          |          |          |          |          |          |          |                                                    |              |   | 0 |   |
| IBD-like                             |          |          |          |          |          |          |          |           |           |            |            |           |           |           |           |           |           |           |          |           |          |          |          |          |          |          |          |          |          |          |          |          |          |          |          |          |          |          |          |          |          |          |          |          |                                                    |              |   | 0 |   |
| MBL                                  |          |          |          |          |          |          |          |           |           |            |            |           |           |           |           |           |           |           |          |           |          |          |          |          |          |          |          |          |          |          |          |          |          |          |          |          |          |          |          |          |          |          |          |          |                                                    |              |   | 0 |   |
| RALD                                 |          |          |          |          |          |          |          |           |           |            |            |           |           |           |           |           |           |           |          |           |          |          |          |          |          |          |          |          |          |          |          |          |          |          |          |          |          |          |          |          |          |          |          |          |                                                    |              |   | 0 |   |
| Reticular Dysgenesis - AK2 (SCID)    |          |          |          |          |          |          |          |           |           |            |            |           |           |           |           |           |           |           |          |           |          |          |          |          |          |          |          |          |          |          |          |          |          |          |          |          |          |          |          |          |          |          |          |          |                                                    |              | 0 |   |   |
| <b>Total</b>                         | <b>1</b> | <b>1</b> | <b>2</b> | <b>2</b> | <b>1</b> | <b>4</b> | <b>6</b> | <b>13</b> | <b>26</b> | <b>666</b> | <b>194</b> | <b>52</b> | <b>24</b> | <b>30</b> | <b>25</b> | <b>14</b> | <b>17</b> | <b>15</b> | <b>8</b> | <b>15</b> | <b>6</b> | <b>5</b> | <b>8</b> | <b>5</b> | <b>5</b> | <b>4</b> | <b>4</b> | <b>2</b> | <b>8</b> | <b>3</b> | <b>2</b> | <b>1</b> | <b>2</b> | <b>3</b> | <b>1</b> | <b>1</b> | <b>2</b> | <b>3</b> | <b>2</b> | <b>1</b> | <b>1</b> | <b>1</b> | <b>1</b> | <b>2</b> | <b>1</b>                                           | <b>1,189</b> |   |   |   |

S49: IgG substitution delay

| Relative IgG-dose<br>[mg per kg body<br>weight per month] | Side<br>effects<br>sc | Side<br>effects<br>iv | sc  | iv | Side<br>effects<br>total | No side<br>effects<br>sc | No side<br>effects<br>iv | No side<br>effects<br>total | Side<br>effects<br>sc of sc<br>[%] | Side<br>effects<br>iv of iv<br>[%] | No side<br>effects<br>total of total<br>[%] | Total |
|-----------------------------------------------------------|-----------------------|-----------------------|-----|----|--------------------------|--------------------------|--------------------------|-----------------------------|------------------------------------|------------------------------------|---------------------------------------------|-------|
| 0-50                                                      | 2                     | 0                     | 2   | 5  | 2                        | 0                        | 3                        | 3                           | 100%                               | 0%                                 | 43%                                         | 7     |
| 50-100                                                    | 2                     | 0                     | 10  | 3  | 2                        | 5                        | 3                        | 8                           | 20%                                | 0%                                 | 62%                                         | 13    |
| 100-150                                                   | 2                     | 0                     | 13  | 6  | 2                        | 11                       | 5                        | 16                          | 15%                                | 0%                                 | 84%                                         | 19    |
| 150-200                                                   | 3                     | 1                     | 18  | 12 | 4                        | 14                       | 10                       | 24                          | 17%                                | 8%                                 | 80%                                         | 30    |
| 200-250                                                   | 3                     | 0                     | 27  | 7  | 3                        | 22                       | 6                        | 28                          | 11%                                | 0%                                 | 82%                                         | 34    |
| 250-300                                                   | 2                     | 1                     | 47  | 8  | 3                        | 42                       | 4                        | 46                          | 4%                                 | 13%                                | 84%                                         | 55    |
| 300-350                                                   | 5                     | 6                     | 61  | 32 | 11                       | 50                       | 21                       | 71                          | 8%                                 | 19%                                | 76%                                         | 93    |
| 350-400                                                   | 7                     | 5                     | 63  | 30 | 12                       | 50                       | 20                       | 70                          | 11%                                | 17%                                | 75%                                         | 93    |
| 400-450                                                   | 9                     | 5                     | 115 | 28 | 14                       | 94                       | 18                       | 112                         | 8%                                 | 18%                                | 78%                                         | 143   |
| 450-500                                                   | 11                    | 3                     | 88  | 21 | 14                       | 71                       | 15                       | 86                          | 13%                                | 14%                                | 79%                                         | 109   |
| 500-550                                                   | 7                     | 2                     | 70  | 23 | 9                        | 58                       | 21                       | 79                          | 10%                                | 9%                                 | 85%                                         | 93    |
| 550-600                                                   | 12                    | 1                     | 61  | 30 | 13                       | 42                       | 24                       | 66                          | 20%                                | 3%                                 | 73%                                         | 91    |
| 600-650                                                   | 8                     | 0                     | 46  | 19 | 8                        | 36                       | 17                       | 53                          | 17%                                | 0%                                 | 82%                                         | 65    |
| 650-700                                                   | 3                     | 1                     | 30  | 14 | 4                        | 23                       | 11                       | 34                          | 10%                                | 7%                                 | 77%                                         | 44    |
| 700-750                                                   | 2                     | 1                     | 32  | 13 | 3                        | 27                       | 12                       | 39                          | 6%                                 | 8%                                 | 87%                                         | 45    |
| 750-800                                                   | 4                     | 1                     | 21  | 6  | 5                        | 17                       | 3                        | 20                          | 19%                                | 17%                                | 74%                                         | 27    |
| 800-850                                                   | 2                     | 0                     | 16  | 5  | 2                        | 13                       | 5                        | 18                          | 13%                                | 0%                                 | 86%                                         | 21    |
| 850-900                                                   | 0                     | 0                     | 5   | 1  | 0                        | 4                        | 0                        | 4                           | 0%                                 | 0%                                 | 67%                                         | 6     |
| 900-950                                                   | 2                     | 1                     | 7   | 4  | 3                        | 5                        | 3                        | 8                           | 29%                                | 25%                                | 73%                                         | 11    |
| 950-1000                                                  | 2                     | 0                     | 8   | 2  | 2                        | 5                        | 2                        | 7                           | 25%                                | 0%                                 | 70%                                         | 10    |
| 1000-1050                                                 | 0                     | 0                     | 5   | 1  | 0                        | 5                        | 0                        | 5                           | 0%                                 | 0%                                 | 83%                                         | 6     |
| 1050-1100                                                 | 1                     | 1                     | 7   | 2  | 2                        | 6                        | 0                        | 6                           | 14%                                | 50%                                | 67%                                         | 9     |
| 1100-1150                                                 | 0                     | 0                     | 2   | 2  | 0                        | 2                        | 2                        | 4                           | 0%                                 | 0%                                 | 100%                                        | 4     |
| 1150-1200                                                 | 0                     | 0                     | 5   | 1  | 0                        | 5                        | 1                        | 6                           | 0%                                 | 0%                                 | 100%                                        | 6     |
| 1200-1250                                                 | 0                     | 0                     | 1   | 0  | 0                        | 1                        | 0                        | 1                           | 0%                                 |                                    | 100%                                        | 1     |
| 1250-1300                                                 | 1                     | 0                     | 3   | 4  | 1                        | 2                        | 3                        | 5                           | 33%                                | 0%                                 | 71%                                         | 7     |
| 1300-1350                                                 | 0                     | 0                     | 1   | 0  | 0                        | 1                        | 0                        | 1                           | 0%                                 |                                    | 100%                                        | 1     |
| 1400-1450                                                 | 0                     | 0                     | 4   | 1  | 0                        | 3                        | 1                        | 4                           | 0%                                 | 0%                                 | 80%                                         | 5     |



| Relative IgG-dose<br>[mg per kg body<br>weight per month] | Side<br>effects<br>sc | Side<br>effects<br>iv | sc  | iv  | Side<br>effects<br>total | No side<br>effects<br>sc | No side<br>effects<br>iv | No side<br>effects<br>total | Side<br>effects<br>sc of sc<br>[%] | Side<br>effects<br>iv of iv<br>[%] | No side<br>effects<br>total of total<br>[%] | Total |
|-----------------------------------------------------------|-----------------------|-----------------------|-----|-----|--------------------------|--------------------------|--------------------------|-----------------------------|------------------------------------|------------------------------------|---------------------------------------------|-------|
| 1550-1600                                                 | 0                     | 0                     | 1   | 0   | 0                        | 1                        | 0                        | 1                           | 0%                                 |                                    | 100%                                        | 1     |
| 1600-1650                                                 | 0                     | 0                     | 1   | 0   | 0                        | 1                        | 0                        | 1                           | 0%                                 |                                    | 100%                                        | 1     |
| 1700-1750                                                 | 0                     | 1                     | 2   | 1   | 1                        | 2                        | 0                        | 2                           | 0%                                 | 100%                               | 67%                                         | 3     |
| 1800-1850                                                 | 0                     | 0                     | 1   | 0   | 0                        | 1                        | 0                        | 1                           | 0%                                 |                                    | 100%                                        | 1     |
| 1950-2000                                                 | 0                     | 0                     | 1   | 0   | 0                        | 1                        | 0                        | 1                           | 0%                                 |                                    | 100%                                        | 1     |
| 2000-2050                                                 | 0                     | 0                     | 1   | 0   | 0                        | 1                        | 0                        | 1                           | 0%                                 |                                    | 100%                                        | 1     |
| 2100-2150                                                 | 0                     | 0                     | 1   | 1   | 0                        | 1                        | 1                        | 2                           | 0%                                 | 0%                                 | 100%                                        | 2     |
| 2200-2250                                                 | 0                     | 0                     | 1   | 0   | 0                        | 1                        | 0                        | 1                           | 0%                                 |                                    | 100%                                        | 1     |
| 2250-2300                                                 | 0                     | 0                     | 1   | 0   | 0                        | 1                        | 0                        | 1                           | 0%                                 |                                    | 100%                                        | 1     |
| 2750-2800                                                 | 0                     | 0                     | 1   | 0   | 0                        | 1                        | 0                        | 1                           | 0%                                 |                                    | 100%                                        | 1     |
|                                                           | 90                    | 30                    | 779 | 282 | 120                      | 625                      | 211                      | 836                         | 12%                                | 11%                                | 79%                                         | 1,061 |

S50: Relative IgG-dose [mg per kg body weight per month] and side effects (1,061 patients)

| PID                                        | Total | HSCT | HSCT (%) |
|--------------------------------------------|-------|------|----------|
| SCID                                       | 83    | 72   | 87%      |
| CGD                                        | 129   | 61   | 47%      |
| Combined ID                                | 74    | 28   | 38%      |
| WAS                                        | 29    | 20   | 69%      |
| FHLH                                       | 20    | 16   | 80%      |
| CSR/HIGM (Hyper-IgM)                       | 38    | 11   | 29%      |
| XLP                                        | 29    | 9    | 31%      |
| HIES                                       | 55    | 8    | 15%      |
| Congenital neutropenia                     | 32    | 7    | 22%      |
| IPEX                                       | 5     | 5    | 100%     |
| Atypical SCID                              | 7     | 5    | 71%      |
| Dyskeratosis congenita                     | 7     | 5    | 71%      |
| MSMD                                       | 9     | 4    | 44%      |
| Omenn syndrome                             | 5     | 4    | 80%      |
| HLA class II deficiency                    | 5     | 4    | 80%      |
| Griscelli, type 2                          | 3     | 3    | 100%     |
| MonoMAC                                    | 3     | 3    | 100%     |
| Unclassified IDs                           | 76    | 3    | 4%       |
| Chediak Higashi syndrome                   | 4     | 3    | 75%      |
| NBS1                                       | 10    | 3    | 30%      |
| Early onset of IBD                         | 5     | 3    | 60%      |
| Unclassified phagocytic disorders          | 10    | 3    | 30%      |
| Unclassified antibody def.                 | 267   | 2    | 1%       |
| LAD                                        | 2     | 2    | 100%     |
| Agammaglobulinemia                         | 112   | 2    | 2%       |
| Cartilage hair hypoplasia                  | 4     | 2    | 50%      |
| XLT (WASP)                                 | 7     | 2    | 29%      |
| CVID                                       | 728   | 2    | 0,2%     |
| Immune dysregulation, unclassified         | 20    | 2    | 10%      |
| Syndromic PID, unclassified                | 16    | 1    | 6%       |
| Unclassified autoinflammatory              | 22    | 1    | 5%       |
| TLR/NFkappa-B                              | 9     | 1    | 11%      |
| Reticular Dysgenesis - AK2 (SCID)          | 1     | 1    | 100%     |
| Shwachman-Diamond-syndrome                 | 11    | 1    | 9%       |
| A-T                                        | 66    | 1    | 2%       |
| Isolated IgG subclass deficiency           | 101   |      | 0%       |
| Selective IgA deficiency                   | 69    |      | 0%       |
| DGS                                        | 65    |      | 0%       |
| ALPS                                       | 38    |      | 0%       |
| IgA with IgG subclass deficiency           | 26    |      | 0%       |
| FMF                                        | 24    |      | 0%       |
| HAE (C1Inh)                                | 23    |      | 0%       |
| Transient hypogammaglobulinemia of infancy | 21    |      | 0%       |
| No PID entered                             | 19    |      | 0%       |
| CMC                                        | 19    |      | 0%       |
| Specific IgG deficiency (SPAD)             | 18    |      | 0%       |
| TRAPS                                      | 18    |      | 0%       |
| Innate ID, unclassified                    | 12    |      | 0%       |
| Muckle-Wells syndrome                      | 7     |      | 0%       |

| PID                           | Total        | HSCT       | HSCT (%)   |
|-------------------------------|--------------|------------|------------|
| C2 deficiency                 | 6            |            | 0%         |
| CINCA syndrome                | 6            |            | 0%         |
| Netherton syndrome            | 5            |            | 0%         |
| Complement ID, unclassified   | 5            |            | 0%         |
| IgM deficiency                | 5            |            | 0%         |
| WHIM                          | 5            |            | 0%         |
| Hyper IgD syndrome (MVK)      | 5            |            | 0%         |
| Ivemark syndrome              | 4            |            | 0%         |
| APECED                        | 4            |            | 0%         |
| Cyclic neutropenia            | 4            |            | 0%         |
| APDS                          | 3            |            | 0%         |
| C8 deficiency                 | 3            |            | 0%         |
| Steinert myotonic dystrophy   | 3            |            | 0%         |
| CD4 deficiency                | 2            |            | 0%         |
| FCAS                          | 2            |            | 0%         |
| ICF                           | 2            |            | 0%         |
| PFC                           | 2            |            | 0%         |
| Schimke disease               | 2            |            | 0%         |
| Isolated congenital asplenia  | 2            |            | 0%         |
| Thymoma with immunodeficiency | 2            |            | 0%         |
| Early-onset multi-organ AI    | 2            |            | 0%         |
| Factor I deficiency           | 1            |            | 0%         |
| C1 deficiency                 | 1            |            | 0%         |
| CD25 deficiency               | 1            |            | 0%         |
| GSD 1b                        | 1            |            | 0%         |
| Hermansky-Pudlak syndrome     | 1            |            | 0%         |
| PMS2 deficiency               | 1            |            | 0%         |
| C7 deficiency                 | 1            |            | 0%         |
| CD27 deficiency               | 1            |            | 0%         |
| IBD-like                      | 1            |            | 0%         |
| Bloom syndrome                | 1            |            | 0%         |
| G6PD                          | 1            |            | 0%         |
| RALD                          | 1            |            | 0%         |
| Fc receptor deficiencies      | 1            |            | 0%         |
| Type 1 interferonopathies     | 1            |            | 0%         |
| MBL                           | 1            |            | 0%         |
| Acquired angioedema           | 1            |            | 0%         |
| <b>Total</b>                  | <b>2,453</b> | <b>300</b> | <b>12%</b> |

S51: Patients with HSCT

| Main group / sub group                                                                     | Number of patients |
|--------------------------------------------------------------------------------------------|--------------------|
| Autoinflammatory disorders                                                                 | 1                  |
| Unclassified autoinflammatory diseases                                                     | 1                  |
| Combined immunodeficiencies                                                                | 21                 |
| Atypical severe combined immunodeficiency (Atypical SCID)                                  | 3                  |
| Combined immunodeficiency (CID)                                                            | 5                  |
| Severe combined immunodeficiency (SCID)                                                    | 13                 |
| Diseases of immune dysregulation                                                           | 5                  |
| Hemophagocytic lymphohistiocytosis (HLH)                                                   | 4                  |
| Unclassified disorders of immune dysregulation                                             | 1                  |
| Other well defined PIDs                                                                    | 6                  |
| DNA-breakage disorder ( <i>NBS1</i> )                                                      | 1                  |
| Hyper IgE syndromes ( <i>DOCK8</i> )                                                       | 1                  |
| MonoMAC ( <i>GATA2</i> )                                                                   | 2                  |
| Wiskott-Aldrich syndrome ( <i>WASP</i> (X-linked))                                         | 2                  |
| Phagocytic disorders                                                                       | 5                  |
| Chronic granulomatous disease ( <i>GP91-phox</i> ( <i>CYBB</i> ))                          | 4                  |
| Unclassified phagocytic disorders                                                          | 1                  |
| Predominantly antibody disorders                                                           | 6                  |
| Agammaglobulinemias ( <i>BTK</i> , X-linked)                                               | 1                  |
| Class switch recombination defects (CSR) /<br>HIGM syndromes <i>CD40L</i> ( <i>CD154</i> ) | 1                  |
| Unclassified antibody deficiency ( <i>LRBA</i> )                                           | 1                  |
| <b>Total</b>                                                                               | <b>42</b>          |

S52: Patients with HSCT and Ig treatment after HSCT

### Age distribution by year of birth

When analysing all 2,453 registered patients (and also the 12 most frequent PIDs), they exhibited a bimodal distribution according to their year of birth. The first peak contained patients currently aged 8 to 23, hence born between 1995 and 2007. The second peak contained patients aged 50 to 60, born between 1967 and 1959 (S55 and S56).

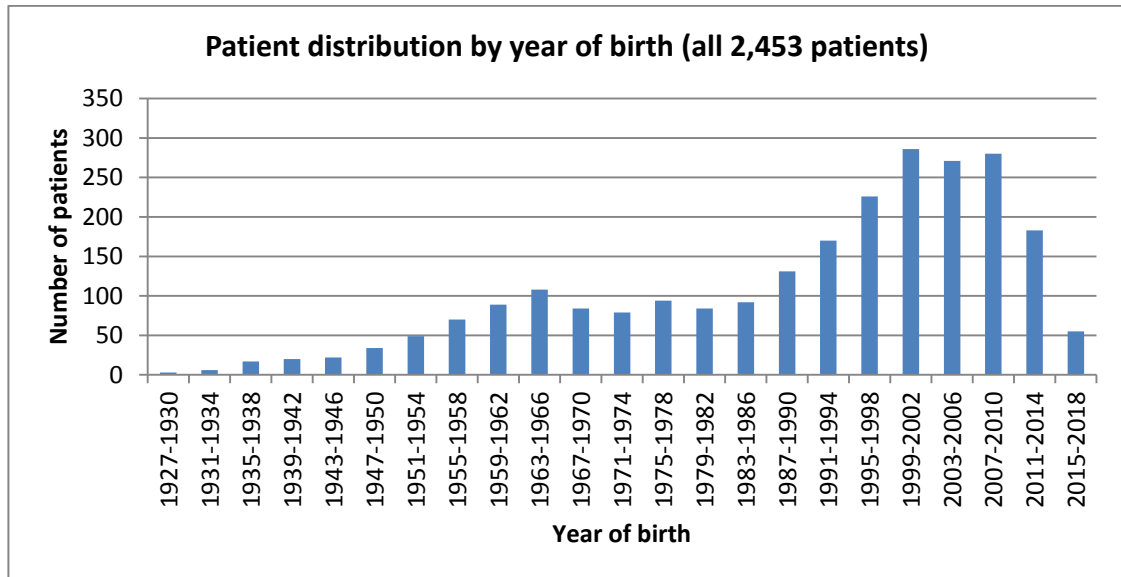

S53: Age distribution by year of birth of 2,453 patients

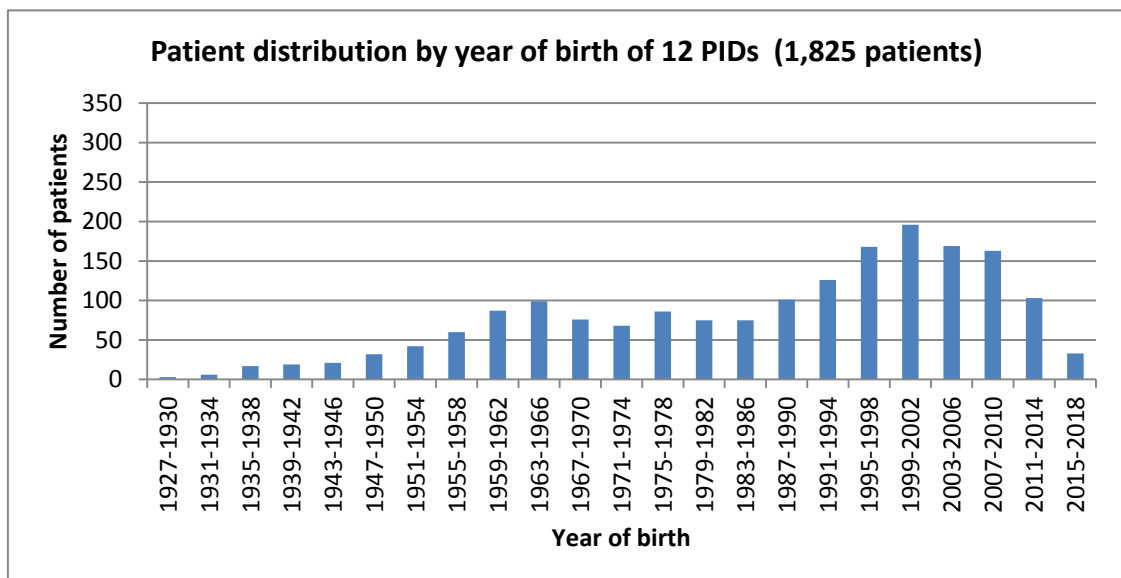

S54: Age distribution by year of birth of 12 PIDs (1,825 patients)

When we compared the individual PIDs with the highest numbers of registered patients (12 PIDs), quite different age curves appeared (S57, S58): For SCID and A-T, the majority of patients were aged 20 and younger, whereas most patients with CVID were aged 20 to 60. The oldest CVID patient was born in 1928 and the youngest registered one in 2011. Selective IgA deficiency and isolated IgG subclass deficiency exhibited a similar distribution to CVID, with a slight elevation between 1995 and 2010. A similar curve was also observed for patients with unclassified IDs.

The curves of SCID, A-T, and DGS patients were similar: The first patient with DGS was born in 1975, the first A-T patient in 1977 and the first patient with SCID in 1988. An increase of patients was recorded between 2003 and 2014. The oldest registered HIES patient was born in 1973 and the youngest in 2016. Here, we found that most patients were aged (11 patients) (S59).

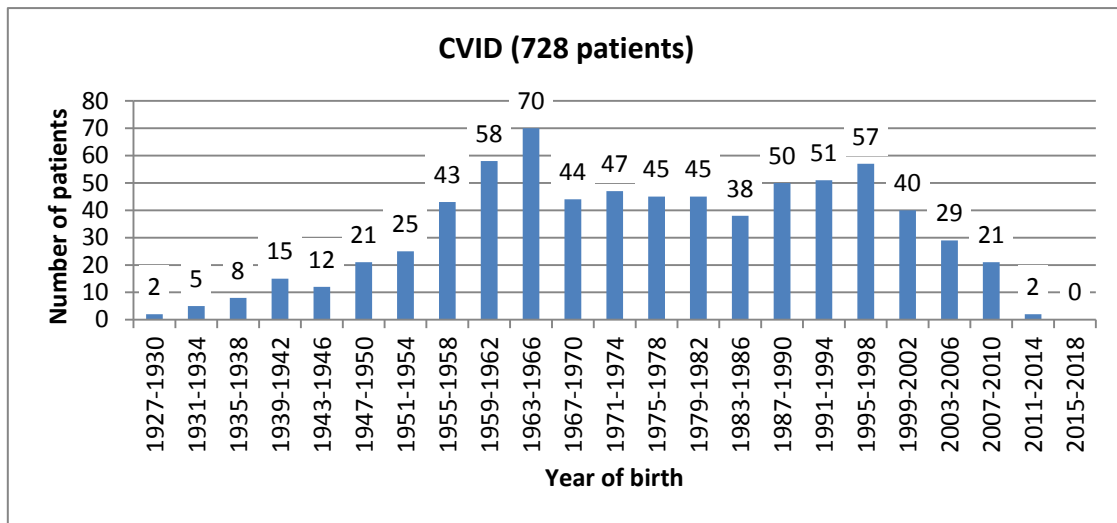

S55: Age distribution by year of birth of 728 CVID patients

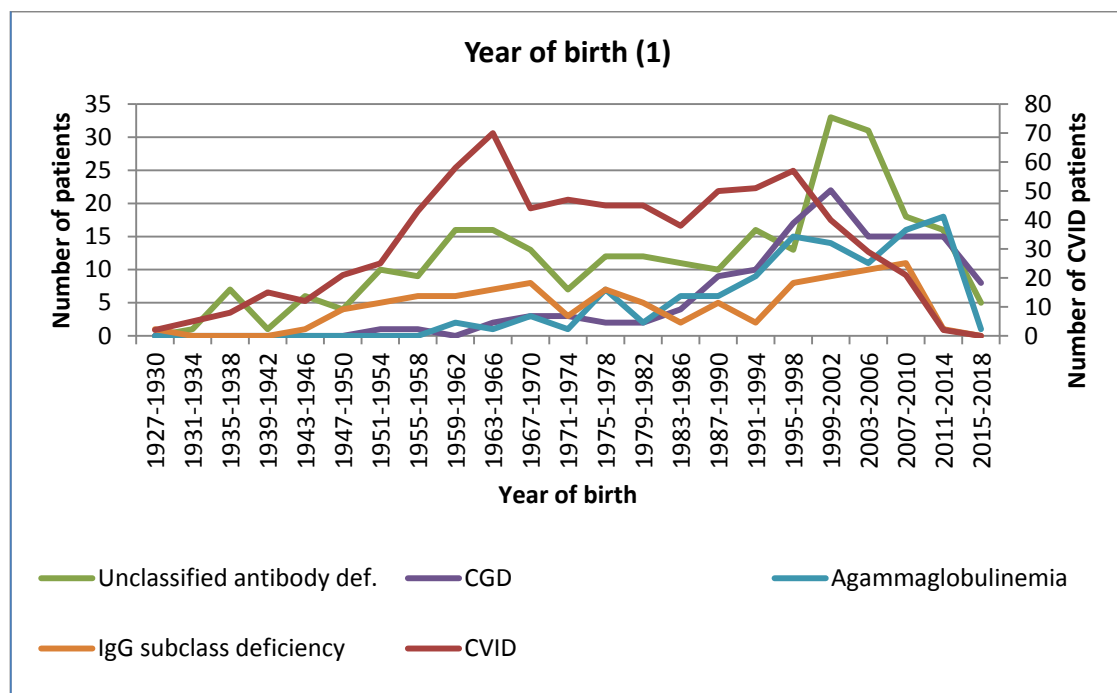

S56: Age distribution by year of birth of the 5 PIDs with the most patients (all registered patients)

Please note the different scaling of the number of CVID patients. Only one male patient born in 2007 had a HSCT treatment. We grouped the year of birth of all registered patients in 4-year span similar to Gathmann B et al. [3].

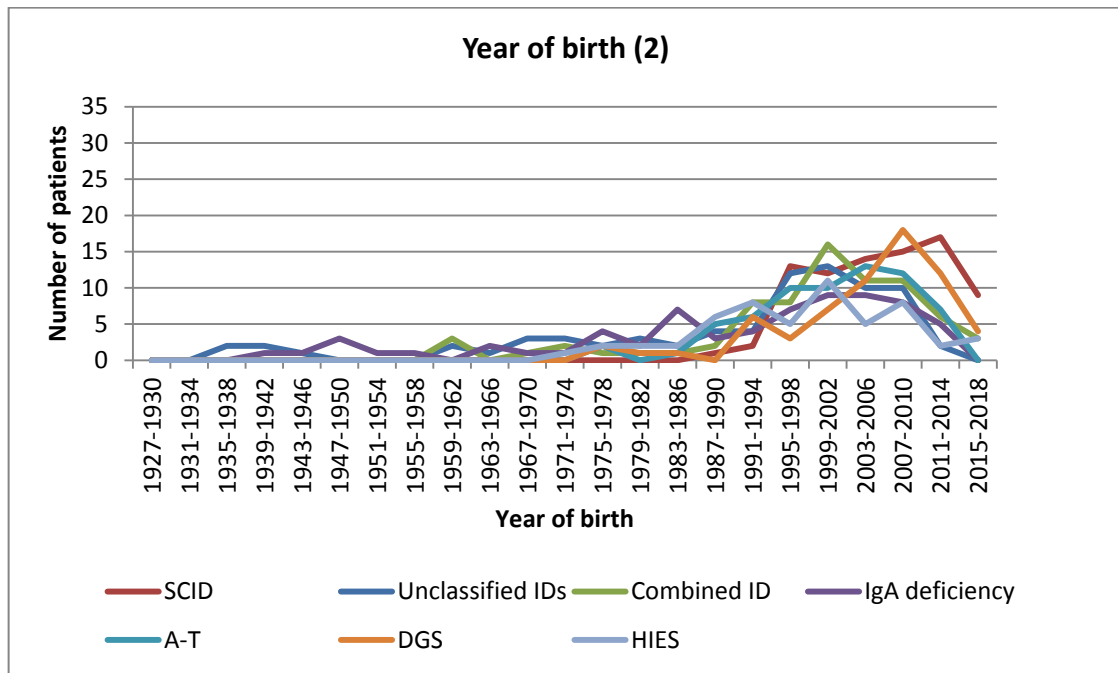

S57: Age distribution by year of birth of the first 7-12 PIDs with the most patients (all registered patients)

We grouped the year of birth of all registered patients in 4-year span similar to Gathmann B et al. [3].
